# Supplementary material for: Synthesis of imidazo[1,2-a][1,3,5]triazines by NBS-mediated coupling of 2-amino-1,3,5-triazines with 1,3-dicarbonyl compounds
Source: Royal Society of Chemistry journal article supplement (doi:10.1039/c9nj05794c), 2020-01-01

Support Information

**Synthesis of imidazo[1,2-a][1,3,5]triazines by NBS mediated coupling of  
2-amino-1,3,5-triazines with 1,3-dicarbonyl compounds**

**Zexi Pan, Chan Song, Chen Zhang, Wei Zhou, and Dong-Mei Cui**

**Experimental Section**

Under otherwise noted, materials were obtained from commercial suppliers and used without further purification. Thin layer chromatography (TLC) was performed using silica gel 60 F<sub>254</sub> and visualized using UV light. Column chromatography was performed with silica gel (mesh 300-400). <sup>1</sup>H NMR and <sup>13</sup>C NMR spectra were recorded on a Bruker Avance 500 MHz spectrometer in CDCl<sub>3</sub> with Me<sub>4</sub>Si as an internal standard. Data were reported as follows: chemical shift in ppm (δ), multiplicity (s = singlet, d = doublet, t = triplet, q = quartet, br = broad and m = multiplet), coupling constant in Hertz (Hz) and integration. IR spectra were recorded on an FT-IR spectrometer, and only major peaks are reported in cm<sup>-1</sup>. HRMS and mass data were recorded by ESI on a TOF mass spectrometer.

**General procedure for the preparation of imidazo[1,2-a][1,3,5]triazines**

To a mixture of 2-amino-1,3,5-triazine **1** (1.0 mmol) and 1,3-dicarbonyl compound **2** (0.5 mmol) in NMP (3 mL) was added NBS (0.5 mmol). The resulting mixture was stirred at 80 °C under N<sub>2</sub> atmosphere. After completion, the reaction mixture was cooled to room temperature, added H<sub>2</sub>O and extracted with ethyl acetate (3×15 mL). The organic phase was dried over anhydrous Na<sub>2</sub>SO<sub>4</sub>. The mixture was evaporated under vacuum, and the residue was purified by flash chromatography with petroleum ether/ethyl acetate (2:1 (v/v)) to give the pure product.

Ethyl 2-(dimethylamino)-7-phenylimidazo[1,2-a][1,3,5]triazine-6-carboxylate (**3a**)

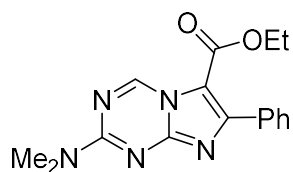

Yellow solid, 133.4 mg, 90% yield; mp: 127-128 °C; <sup>1</sup>H NMR (500 MHz, CDCl<sub>3</sub>): δ 9.70 (s, 1H),

7.95-7.88 (m, 2H), 7.43-7.41(m, 3H), 4.32 (q,  $J = 7.1$  Hz, 2H), 3.34 (s, 3H), 3.29 (s, 3H), 1.29 (t,  $J = 7.1$  Hz, 3H);  $^{13}\text{C}$  NMR (125 MHz,  $\text{CDCl}_3$ ):  $\delta$  160.3, 158.7, 155.1, 152.6, 147.8, 133.1, 130.4, 129.3, 127.4, 108.0, 60.7, 37.4, 37.1, 14.1; IR (KBr,  $\text{cm}^{-1}$ ): 2927, 1699, 1627, 1595, 1504, 1410, 1348, 1130, 755, 695. HRMS (ESI)  $m/z$   $[\text{M}+\text{H}]^+$  calcd for  $\text{C}_{16}\text{H}_{18}\text{N}_5\text{O}_2$  312.1460, found 312.1458.

Methyl 2-(dimethylamino)-7-(p-tolyl)imidazo[1,2-a][1,3,5]triazine-6-carboxylate (**3b**)

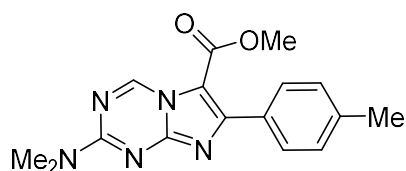

Yellow solid, 123.0 mg, 83% yield; mp: 171-172 °C;  $^1\text{H}$  NMR (500 MHz,  $\text{CDCl}_3$ ):  $\delta$  9.67 (s, 1H), 7.82 (d,  $J = 8.1$  Hz, 2H), 7.24 (d,  $J = 8.1$  Hz, 2H), 3.84 (s, 3H), 3.33 (s, 3H), 3.28 (s, 3H), 2.41 (s, 3H);  $^{13}\text{C}$  NMR (125 MHz,  $\text{CDCl}_3$ ):  $\delta$  160.7, 158.7, 155.4, 152.6, 147.8, 139.5, 130.2, 130.1, 128.4, 107.5, 51.4, 37.4, 37.2, 21.5; IR (KBr,  $\text{cm}^{-1}$ ): 2949, 1697, 1633, 1592, 1409, 1344, 1157, 1131, 1006, 783. HRMS (ESI)  $m/z$   $[\text{M}+\text{H}]^+$  calcd for  $\text{C}_{16}\text{H}_{18}\text{N}_5\text{O}_2$  312.1460, found 312.1463

Methyl 2-(dimethylamino)-7-(3-methoxyphenyl)imidazo[1,2-a][1,3,5]triazine-6-carboxylate (**3c**)

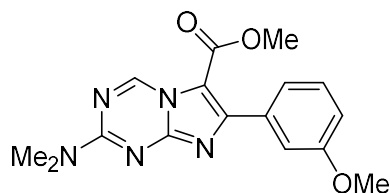

White solid, 132.3 mg, 85% yield; mp: 153-154 °C;  $^1\text{H}$  NMR (500 MHz,  $\text{CDCl}_3$ ):  $\delta$  9.68 (s, 1H), 7.49-7.45 (m, 2H), 7.32 (t,  $J = 8.0$  Hz, 1H), 6.99-6.96 (m, 1H), 3.85 (s, 3H), 3.83 (s, 3H), 3.33 (s, 3H), 3.28 (s, 3H);  $^{13}\text{C}$  NMR (125 MHz,  $\text{CDCl}_3$ ):  $\delta$  160.7, 159.0, 158.7, 154.9, 152.6, 147.8, 134.3, 128.5, 122.9, 115.9, 115.0, 107.8, 55.4, 51.4, 37.4, 37.2; IR (KBr,  $\text{cm}^{-1}$ ): 1683, 1628, 1506, 1472, 1407, 1361, 1197, 762. HRMS (ESI)  $m/z$   $[\text{M}+\text{H}]^+$  calcd for  $\text{C}_{16}\text{H}_{18}\text{N}_5\text{O}_3$  328.1410, found 328.1411

Methyl 7-(3,4-dimethoxyphenyl)-2-(dimethylamino)imidazo[1,2-a][1,3,5]triazine-6-carboxylate (**3d**)

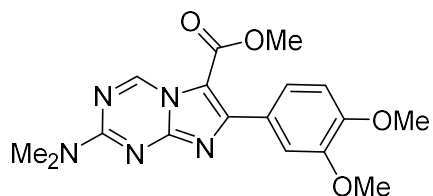

Yellow solid, 144.3 mg, 83% yield; mp: 175-176 °C;  $^1\text{H}$  NMR (500 MHz,  $\text{CDCl}_3$ ):  $\delta$  9.66 (s, 1H),

7.61(d,  $J = 2.0$  Hz, 1H), 7.58(dd,  $J = 8.3, 2.0$  Hz, 1H), 6.93 (d,  $J = 8.3$  Hz, 1H), 3.94 (s, 3H), 3.93 (s, 3H), 3.87 (s, 3H), 3.34 (s, 3H), 3.29 (s, 3H);  $^{13}\text{C}$  NMR (125 MHz,  $\text{CDCl}_3$ ):  $\delta$  160.7, 158.7, 155.1, 152.6, 150.3, 148.2, 147.9, 125.5, 123.8, 113.5, 110.1, 107.3, 56.0, 55.9, 51.4, 37.4, 37.2; IR (KBr,  $\text{cm}^{-1}$ ): 2960, 1679, 1623, 1536, 1424, 1355, 1267, 1132, 1046, 1020, 766. HRMS (ESI)  $m/z$   $[\text{M}+\text{H}]^+$  calcd for  $\text{C}_{17}\text{H}_{20}\text{N}_5\text{O}_4$  358.1515, found 358.1514.

Methyl 7-(3-bromophenyl)-2-(dimethylamino)imidazo[1,2-a][1,3,5]triazine-6-carboxylate (**3e**)

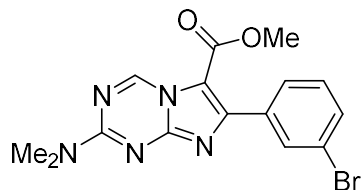

Yellow solid, 128.3 mg, 71% yield; mp: 152-153 °C;  $^1\text{H}$  NMR (500 MHz,  $\text{CDCl}_3$ ):  $\delta$  9.68 (s, 1H),  $\delta$  8.09 (t,  $J = 1.8$  Hz, 1H), 7.86 (dt,  $J = 8.0, 1.8$  Hz, 1H), 7.56 (dt,  $J = 7.9, 1.8$  Hz, 1H), 7.29 (dd,  $J = 8.0, 7.9$  Hz, 1H), 3.86 (s, 3H), 3.35 (s, 3H), 3.29 (s, 3H);  $^{13}\text{C}$  NMR (125 MHz,  $\text{CDCl}_3$ ):  $\delta$  160.4, 158.8, 153.3, 152.7, 147.8, 135.1, 133.3, 132.3, 129.2, 128.9, 121.7, 108.1, 51.6, 37.5, 37.2; IR (KBr,  $\text{cm}^{-1}$ ): 1687, 1625, 1593, 1471, 1409, 1362, 1195, 1153, 782. HRMS (ESI)  $m/z$   $[\text{M}+\text{H}]^+$  calcd for  $\text{C}_{15}\text{H}_{15}\text{N}_5\text{O}_2\text{Br}$  376.0409, found 376.0404.

Methyl 2-(dimethylamino)-7-(4-fluorophenyl)imidazo[1,2-a][1,3,5]triazine-6-carboxylate (**3f**)

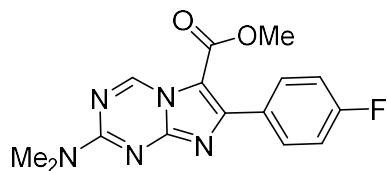

White solid, 118.4 mg, 75% yield; mp: 180-181 °C;  $^1\text{H}$  NMR (500 MHz,  $\text{CDCl}_3$ ):  $\delta$  9.66 (s, 1H), 7.93-7.90 (m, 2H), 7.13-7.10 (m, 2H), 3.85 (s, 3H), 3.34 (s, 3H), 3.28 (s, 3H);  $^{13}\text{C}$  NMR (125 MHz,  $\text{CDCl}_3$ ): 163.5 (d,  $J = 247.9$  Hz), 160.5, 158.7, 154.2, 152.6, 147.8, 132.3 (d,  $J = 8.2$  Hz), 129.1 (d,  $J = 3.1$  Hz), 114.6 (d,  $J = 21.7$  Hz), 107.7, 51.4, 37.4, 37.2; IR (KBr,  $\text{cm}^{-1}$ ): 1698, 1628, 1586, 1412, 1371, 1132, 1040, 850, 765. HRMS (ESI)  $m/z$   $[\text{M}+\text{H}]^+$  calcd for  $\text{C}_{15}\text{H}_{15}\text{FN}_5\text{O}_2$  316.1210, found 316.1206.

Methyl 7-(3-chlorophenyl)-2-(dimethylamino)imidazo[1,2-a][1,3,5]triazine-6-carboxylate (**3g**)

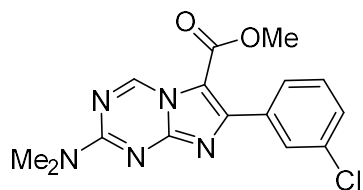

White solid, 124.9 mg, 75% yield; mp: 153-154 °C; <sup>1</sup>H NMR (500 MHz, CDCl<sub>3</sub>): δ 9.67 (s, 1H), 7.93 (t, *J* = 1.7 Hz, 1H), 7.79 (dt, *J* = 8.0, 1.7 Hz, 1H), 7.39(dt, *J* = 8.0, 1.7 Hz, 1H), 7.35(t, *J* = 8.0, 1H), 3.86 (s, 3H), 3.34 (s, 3H), 3.28 (s, 3H); <sup>13</sup>C NMR (125 MHz, CDCl<sub>3</sub>): δ 160.3, 158.7, 153.4, 152.6, 147.8, 134.8, 133.5, 130.4, 129.4, 128.9, 128.4, 108.0, 51.5, 37.4, 37.2; IR (KBr, cm<sup>-1</sup>): 948, 1676, 1583, 1462, 1410, 1316, 1250, 1180, 1049, 807, 770. HRMS (ESI) *m/z* [M+H]<sup>+</sup> calcd for C<sub>15</sub>H<sub>15</sub>ClN<sub>5</sub>O<sub>2</sub> 332.0914, found 332.0917.

Methyl 2-(dimethylamino)-7-(pyridin-4-yl)imidazo[1,2-a][1,3,5]triazine-6-carboxylate (**3h**)

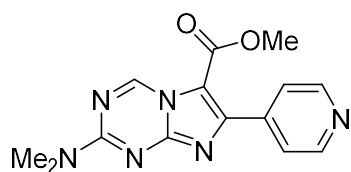

Yellow solid, 68.0 mg, 46% yield; mp: 195 °C; <sup>1</sup>H NMR (500 MHz, CDCl<sub>3</sub>): δ 9.67 (s, 1H), 8.69 (dd, *J* = 4.6, 1.7 Hz, 2H), 7.79 (dd, *J* = 4.6, 1.7 Hz, 2H), 3.86 (s, 3H), 3.35 (s, 3H), 3.29 (s, 3H); <sup>13</sup>C NMR (125 MHz, CDCl<sub>3</sub>): δ 160.1, 158.7, 152.8, 151.9, 149.4, 147.8, 140.9, 124.4, 108.8, 51.6, 37.5, 37.2; IR (KBr, cm<sup>-1</sup>): 1700, 1634, 1591, 1407, 1359, 1185, 1138, 764. HRMS (ESI) *m/z* [M+H]<sup>+</sup> calcd for C<sub>14</sub>H<sub>15</sub>N<sub>6</sub>O<sub>2</sub> 299.1256, found 299.1255.

Methyl 2-(dimethylamino)-7-(furan-2-yl)imidazo[1,2-a][1,3,5]triazine-6-carboxylate (**3i**)

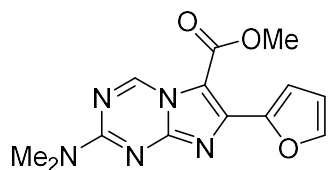

Yellow solid, 144.3mg, 90% yield; mp: 219-220 °C; <sup>1</sup>H NMR (500 MHz, CDCl<sub>3</sub>): δ 9.59 (s, 1H), 7.62 (dd, *J* = 3.5, 0.4 Hz, 1H), 7.48 (dd, *J* = 3.5, 0.4 Hz 1H), 6.56 (dd, *J* = 3.5, 3.5 Hz, 1H), 3.97 (s, 3H), 3.31 (s, 3H), 3.26 (s, 3H); <sup>13</sup>C NMR (125 MHz, CDCl<sub>3</sub>): δ 160.1, 158.7, 152.7, 147.7, 147.2, 144.4, 115.4, 111.9, 106.4, 51.5, 37.3, 37.1; IR (KBr, cm<sup>-1</sup>): 1684, 1633, 1407, 1372, 1194, 1147, 767. HRMS (ESI) *m/z* [M+H]<sup>+</sup> calcd for C<sub>13</sub>H<sub>14</sub>N<sub>5</sub>O<sub>3</sub> 288.1097, found 288.1099.

Methyl 2-(dimethylamino)-7-(thiophen-2-yl)imidazo[1,2-a][1,3,5]triazine-6-carboxylate (**3j**)

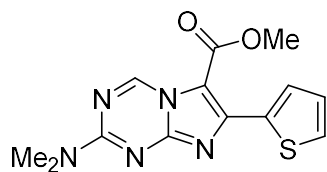

Yellow solid, 142.0mg, 93% yield; mp: 209 °C; <sup>1</sup>H NMR (500 MHz, CDCl<sub>3</sub>): δ 9.58 (s, 1H), 8.25 (dd, *J* = 3.8, 1.1 Hz, 1H), 7.51 (dd, *J* = 5.1, 1.1 Hz, 1H), 7.14 (dd, *J* = 5.0, 3.8 Hz, 1H), 3.99 (s, 3H), 3.32 (s, 3H), 3.27 (s, 3H); <sup>13</sup>C NMR (125 MHz, CDCl<sub>3</sub>): δ 160.2, 158.8, 152.3, 148.5, 147.7, 135.9, 131.2, 129.9, 127.6, 106.1, 51.5, 37.5, 37.2; IR (KBr, cm<sup>-1</sup>): 1693, 1632, 1590, 1405, 1176, 1120, 763. HRMS (ESI) *m/z* [M+H]<sup>+</sup> calcd for C<sub>13</sub>H<sub>14</sub>N<sub>5</sub>O<sub>2</sub>S 304.0868, found 304.0868.

Ethyl 2-(dimethylamino)-7-methylimidazo[1,2-a][1,3,5]triazine-6-carboxylate (**3k**)

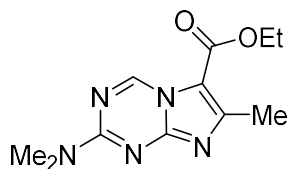

White solid, 96.0 mg, 77% yield; mp: 143 °C; <sup>1</sup>H NMR (500 MHz, CDCl<sub>3</sub>): δ 9.53 (s, 1H), 4.38 (q, *J* = 7.2, 2H), 3.30 (s, 3H), 3.25 (s, 3H), 2.60 (s, 3H), 1.41 (t, *J* = 7.1 Hz, 3H); <sup>13</sup>C NMR (125 MHz, CDCl<sub>3</sub>): δ 160.6, 158.6, 155.4, 152.6, 147.0, 108.8, 60.4, 37.3, 37.0, 16.1, 14.4; IR (KBr, cm<sup>-1</sup>): 2995, 1682, 1627, 1581, 1405, 1384, 1197, 1096, 1014, 762. HRMS (ESI) *m/z* [M+H]<sup>+</sup> calcd for C<sub>11</sub>H<sub>16</sub>N<sub>5</sub>O<sub>2</sub> 250.1304, found 250.1307.

Methyl 2-(dimethylamino)-7-methylimidazo[1,2-a][1,3,5]triazine-6-carboxylate (**3l**)

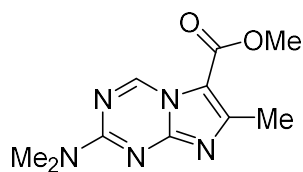

Yellow solid, 69.4mg, 61% yield; mp: 187-188 °C; <sup>1</sup>H NMR (500 MHz, CDCl<sub>3</sub>): δ 9.52 (s, 1H), 3.92 (s, 3H), 3.30 (s, 3H), 3.25 (s, 3H), 2.59 (s, 3H); <sup>13</sup>C NMR (125 MHz, CDCl<sub>3</sub>): δ 161.1, 158.7, 155.6, 152.8, 147.1, 108.7, 51.4, 37.4, 37.1, 16.2; IR (KBr, cm<sup>-1</sup>): 1697, 1633, 1594, 1385, 1195, 1091, 758. HRMS (ESI) *m/z* [M+H]<sup>+</sup> calcd for C<sub>10</sub>H<sub>14</sub>N<sub>5</sub>O<sub>2</sub> 236.1147, found 236.1147.

1-(2-(Dimethylamino)-7-methylimidazo[1,2-a][1,3,5]triazin-6-yl)ethan-1-one (**3m**)

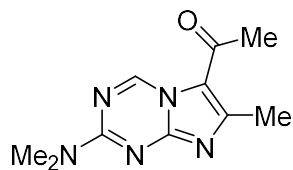

Yellow solid, 75.4mg, 69% yield; mp: 162-163 °C; <sup>1</sup>H NMR (500 MHz, CDCl<sub>3</sub>): δ 9.89 (s, 1H), 3.30 (s, 3H), 3.25 (s, 3H), 2.66 (s, 3H), 2.52 (s, 3H); <sup>13</sup>C NMR (125 MHz, CDCl<sub>3</sub>): δ 186.2, 159.0, 155.50, 152.9, 148.1, 119.1, 37.4, 37.0, 29.1, 17.7; IR (KBr, cm<sup>-1</sup>): 2931, 1636, 1594, 1413, 1386, 1170, 1070, 787. HRMS (ESI) m/z [M+H]<sup>+</sup> calcd for C<sub>10</sub>H<sub>14</sub>N<sub>5</sub>O 220.1198, found 220.1200.

(2-(Dimethylamino)-7-phenylimidazo[1,2-a][1,3,5]triazin-6-yl)(phenyl)methanone (**3n**)

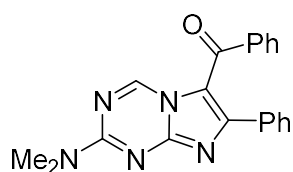

Yellow solid, 156.0 mg, 91% yield; mp: 207-208 °C, [lit]<sup>1</sup>: 209-210 °C; <sup>1</sup>H NMR (500 MHz, CDCl<sub>3</sub>): δ 9.90 (s, 1H), 7.48-7.45 (m, 2H), 7.34-7.32 (m, 2H), 7.29-7.26 (m, 1H), 7.16-7.13 (m, 1H), 7.11-7.04 (m, 4H), 3.38 (s, 3H), 3.33 (s, 3H).

2-(Dimethylamino)-7-phenylimidazo[1,2-a][1,3,5]triazine-6-carboxamide (**3o**)

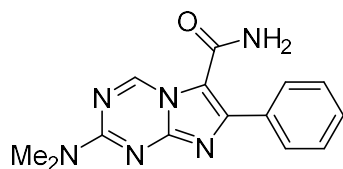

Yellow solid, 102.2 mg, 71% yield; mp: 257-258 °C; <sup>1</sup>H NMR (500 MHz, CDCl<sub>3</sub>): δ 9.93 (s, 1H), 7.77-7.71 (m, 2H), 7.58-7.45 (m, 3H), 5.73 (br, 1H), 5.36 (br, 1H), 3.35 (s, 3H), 3.29 (s, 3H); <sup>13</sup>C NMR (125 MHz, DMSO-*d*<sub>6</sub>): δ 161.8 158.2, 150.7, 148.5, 147.1, 133.8, 129.4, 129.3, 128.9, 112.0, 37.5, 37.0; IR (KBr, cm<sup>-1</sup>): 3109, 1658, 1630, 1590, 1405, 1364, 1151, 786. HRMS (ESI) m/z [M+H]<sup>+</sup> calcd for C<sub>14</sub>H<sub>15</sub>N<sub>6</sub>O 283.1307, found 283.1303.

2-(Dimethylamino)-N,7-diphenylimidazo[1,2-a][1,3,5]triazine-6-carboxamide (**3p**)

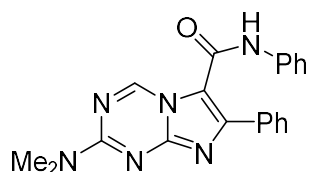

Yellow solid, 136.2mg, 76% yield; mp: >300 °C; <sup>1</sup>H NMR (500 MHz, CDCl<sub>3</sub>): δ 9.93 (s, 1H),

7.79-7.78 (m, 2H), 7.59 (s, 1H), 7.58- 7.52 (m, 3H), 7.31-7.26 (m, 4H), 7.09-7.06 (m, 1H), 3.35 (s, 3H), 3.28 (s, 3H);  $^{13}\text{C}$  NMR (125 MHz,  $\text{CDCl}_3$ ):  $\delta$  158.6, 158.1, 152.3, 149.9, 148.1, 137.5, 133.1, 130.2, 129.8, 129.2, 129.1, 124.3, 119.4, 111.2, 37.5, 37.2; IR (KBr,  $\text{cm}^{-1}$ ): 2923, 1653, 1633, 1586, 1374, 1151, 770, 694. HRMS (ESI)  $m/z$   $[\text{M}+\text{H}]^+$  calcd for  $\text{C}_{20}\text{H}_{19}\text{N}_6\text{O}$  359.1620, found 359.1615.

2-(Dimethylamino)-N,N-diethyl-7-phenylimidazo[1,2-a][1,3,5]triazine-6-carboxamide (**3q**)

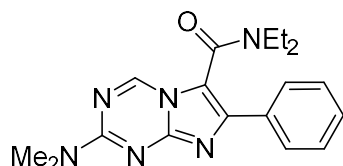

Yellow solid, 102.8mg, 61% yield; mp: 143-144 °C;  $^1\text{H}$  NMR (500 MHz,  $\text{CDCl}_3$ ):  $\delta$  8.93 (s, 1H), 7.82-7.74 (m, 2H), 7.43-7.35 (m, 3H), 3.60-3.51 (m, 2H), 3.29 (s, 3H), 3.25 (s, 3H), 3.11-3.01 (m, 2H), 1.35-1.15 (m, 3H), 0.91-0.65 (m, 3H);  $^{13}\text{C}$  NMR (125 MHz,  $\text{CDCl}_3$ ):  $\delta$  161.5, 158.2, 151.1, 146.2, 145.0, 133.2, 129.1, 128.5, 128.3, 109.9, 43.0, 39.0, 37.4, 37.2, 13.9, 12.4; IR (KBr,  $\text{cm}^{-1}$ ): 2959, 2930, 1636, 1613, 1590, 1405, 1127, 777, 698. HRMS (ESI)  $m/z$   $[\text{M}+\text{H}]^+$  calcd for  $\text{C}_{18}\text{H}_{23}\text{N}_6\text{O}$  339.1933, found 339.1936.

2-(Dimethylamino)-7-methyl-N-phenylimidazo[1,2-a][1,3,5]triazine-6-carboxamide (**3r**)

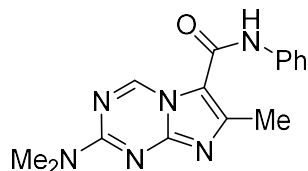

Yellow solid, 97.9mg, 66% yield; mp: 263°C;  $^1\text{H}$  NMR (500 MHz,  $\text{CDCl}_3$ ):  $\delta$  9.36 (s, 1H), 8.60 (s, 1H), 7.73-7.70 (m, 2H), 7.37-7.34 (m, 2H), 7.13-7.10(m, 1H), 3.32 (s, 3H), 3.27 (s, 3H), 2.83 (s, 3H);  $^{13}\text{C}$  NMR (125 MHz,  $\text{CDCl}_3$ ):  $\delta$  161.5, 157.9, 148.0, 144.3, 138.1, 133.3, 129.0, 123.9 120.0, 119.4, 37.5, 37.3, 8.4; IR (KBr,  $\text{cm}^{-1}$ ): 2910, 1678, 1640, 1595, 1510, 1439, 1305, 1234, 1076, 756, 693. HRMS (ESI)  $m/z$   $[\text{M}+\text{H}]^+$  calcd for  $\text{C}_{15}\text{H}_{17}\text{N}_6\text{O}$  297.1464, found 297.1460.

Ethyl 2-(diethylamino)-7-phenylimidazo[1,2-a][1,3,5]triazine-6-carboxylate (**3s**)

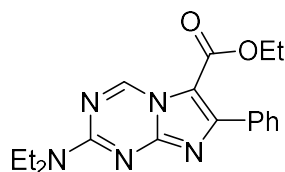

Yellow solid, 137.1mg, 82% yield; mp: 109-110 °C;  $^1\text{H}$  NMR (500 MHz,  $\text{CDCl}_3$ ):  $\delta$  9.69 (s, 1H),

7.93-7.88 (m, 2H), 7.44-7.39 (m, 3H), 4.32 (q,  $J = 7.1$  Hz, 2H), 3.76-3.71 (m, 4H), 1.31-1.24 (m, 9H);  $^{13}\text{C}$  NMR (125 MHz,  $\text{CDCl}_3$ ):  $\delta$  160.3, 157.8, 155.2, 152.9, 148.0, 133.3, 130.5, 129.4, 127.5, 108.0, 60.7, 42.9, 42.4, 14.1, 13.6, 12.5; IR (KBr,  $\text{cm}^{-1}$ ): 2987, 1670, 1625, 1567, 1381, 1351, 1153, 1086, 1045, 761, 697; HRMS (ESI)  $m/z$   $[\text{M}+\text{H}]^+$  calcd for  $\text{C}_{18}\text{H}_{22}\text{N}_5\text{O}_2$  340.1773, found 340.1771.

Ethyl 7-phenyl-2-(piperidin-1-yl)imidazo[1,2-a][1,3,5]triazine-6-carboxylate (**3t**)

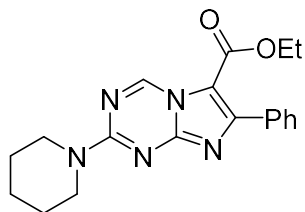

White solid, 150.6mg, 72% yield; mp: 106-107 °C;  $^1\text{H}$  NMR (500 MHz,  $\text{CDCl}_3$ ):  $\delta$  9.66 (s, 1H), 7.93-7.88 (m, 2H), 7.42-7.41 (m, 3H), 4.32 (q,  $J = 7.1$  Hz, 2H), 3.95-3.93 (m, 4H), 1.72-1.66 (m, 6H), 1.29 (t,  $J = 7.1$  Hz, 3H);  $^{13}\text{C}$  NMR (125 MHz,  $\text{CDCl}_3$ ):  $\delta$  160.2, 157.6, 155.1, 152.8, 148.0, 133.2, 130.4, 129.3, 127.4, 108.1, 60.65, 45.8, 45.0, 26.1, 25.5, 24.6, 14.1; IR (KBr,  $\text{cm}^{-1}$ ): 1682, 1623, 1567, 1377, 1191, 757, 657. HRMS (ESI)  $m/z$   $[\text{M}+\text{H}]^+$  calcd for  $\text{C}_{19}\text{H}_{22}\text{N}_5\text{O}_2$  352.1773, found 352.1768.

Ethyl 2-morpholino-7-phenylimidazo[1,2-a][1,3,5]triazine-6-carboxylate (**3u**)

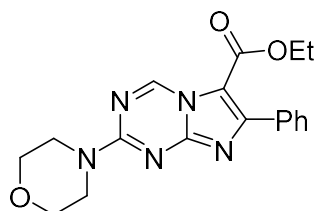

White solid, 160.6mg, 76% yield; mp: 139 °C;  $^1\text{H}$  NMR (500 MHz,  $\text{CDCl}_3$ ):  $\delta$  9.66 (s, 1H), 7.90 (dd,  $J = 6.0, 2.3$  Hz, 2H), 7.46-7.39 (m, 3H), 4.33 (q,  $J = 7.1$  Hz, 2H), 3.99 (t,  $J = 4.9$  Hz, 4H), 3.78 (t,  $J = 4.9$  Hz, 4H), 1.29 (t,  $J = 7.1$  Hz, 3H);  $^{13}\text{C}$  NMR (125 MHz,  $\text{CDCl}_3$ ):  $\delta$  160.2, 157.9, 155.1, 152.3, 148.3, 132.9, 130.4, 129.4, 127.5, 108.4, 66.7, 66.5, 60.8, 44.9, 44.2, 14.0; IR (KBr,  $\text{cm}^{-1}$ ): 2992, 1674, 1622, 1557, 1402, 1383, 1242, 1154, 757, 684. HRMS (ESI)  $m/z$   $[\text{M}+\text{H}]^+$  calcd for  $\text{C}_{18}\text{H}_{20}\text{N}_5\text{O}_3$  354.1566, found 354.1561.

Ethyl 7-phenyl-2-(piperazin-1-yl)imidazo[1,2-a][1,3,5]triazine-6-carboxylate (**3v**)



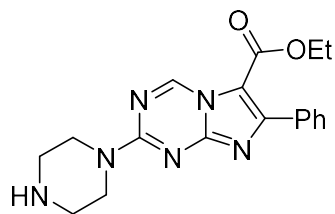

Yellow solid, 129.6mg, 73% yield; mp: 225-226 °C; <sup>1</sup>H NMR (500 MHz, CDCl<sub>3</sub>): δ 9.75 (s, 1H), 8.15 (s, 1H), 7.91-7.87 (m, 2H), 7.43-7.41 (m, 3H), 4.33 (q, *J* = 7.1 Hz, 2H), 4.06-3.99 (m, 4H), 3.68-3.64 (m, 2H), 3.50-3.46 (m, 2H), 1.29 (t, *J* = 7.1 Hz, 3H); <sup>13</sup>C NMR (125 MHz, CDCl<sub>3</sub>): δ 160.9, 160.2, 157.8, 155.2, 152.1, 148.6, 132.8, 130.4, 129.6, 127.6, 108.5, 60.9, 45.2, 44.5, 39.9, 39.3, 14.0; IR (KBr, cm<sup>-1</sup>): 3416, 2923, 1687, 1667, 1622, 1551, 1446, 1344, 1230, 1147, 707. HRMS (ESI) *m/z* [M+H]<sup>+</sup> calcd for C<sub>18</sub>H<sub>21</sub>N<sub>6</sub>O<sub>2</sub> 353.1726, found 353.1725.

Ethyl 7-phenyl-2-(pyrrolidin-1-yl)imidazo[1,2-a][1,3,5]triazine-6-carboxylate (**3w**)

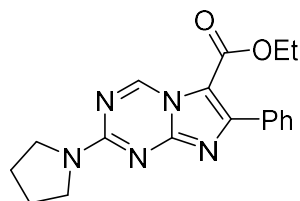

White solid, 131.0mg, 79% yield; mp: 155-157 °C; <sup>1</sup>H NMR (500 MHz, CDCl<sub>3</sub>): δ 9.70 (s, 1H), 7.92-7.90 (m, 2H), 7.43 -7.39 (m, 3H), 4.32 (q, *J* = 7.1 Hz, 2H), 3.74-3.68 (m, 4H), 2.05-2.01 (m, 4H), 1.29 (t, *J* = 7.1 Hz, 3H); <sup>13</sup>C NMR (125 MHz, CDCl<sub>3</sub>): δ 160.3, 156.6, 155.1, 152.6, 147.9, 133.2, 130.5, 129.3, 127.5, 107.9, 60.7, 47.4, 47.0, 25.5, 25.2, 14.1; IR (KBr, cm<sup>-1</sup>): 2993, 1699, 1633, 1574, 1496, 1452, 1342, 1134, 786, 699. HRMS (ESI) *m/z* [M+H]<sup>+</sup> calcd for C<sub>18</sub>H<sub>20</sub>N<sub>5</sub>O<sub>2</sub> 338.1617, found 338.1617.

Ethyl 2-(methylamino)-7-phenylimidazo[1,2-a][1,3,5]triazine-6-carboxylate (**3x**)

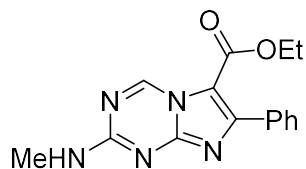

White solid, 76.5mg, 52% yield; mp: 131-132 °C; <sup>1</sup>H NMR (500 MHz, CDCl<sub>3</sub>): δ 9.66 (s, 1H), 7.91-7.89 (m, 2H), 7.44-7.41 (m, 3H), 5.84 (q, *J* = 5.1 Hz, 1H), 4.33 (q, *J* = 7.1 Hz, 2H), 3.12 (d, *J* = 5.1 Hz, 3H), 1.29 (t, *J* = 7.1 Hz, 3H); <sup>13</sup>C NMR (125 MHz, CDCl<sub>3</sub>): δ 160.3, 159.5, 154.6, 152.4, 148.2, 133.0, 130.4, 129.4, 127.5, 108.7, 60.8, 28.3, 14.0; IR (KBr, cm<sup>-1</sup>): 3436, 1704, 1659, 1379, 1195, 760, 696. HRMS (ESI) *m/z* [M+H]<sup>+</sup> calcd for C<sub>15</sub>H<sub>16</sub>N<sub>5</sub>O<sub>2</sub> 298.1304, found 298.1301.

Ethyl 7-phenyl-2-(phenylamino)imidazo[1,2-a][1,3,5]triazine-6-carboxylate (**3y**)

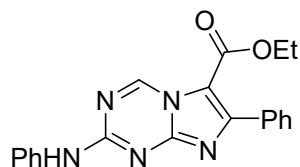

Yellow solid, 71.0mg, 40% yield; mp: 189-190 °C; <sup>1</sup>H NMR (500 MHz, CDCl<sub>3</sub>): δ 9.80 (s, 1H), 7.91-7.88 (m, 4H), 7.72 (br, 1H), 7.48-7.42 (m, 3H), 7.37 (m, 2H), 7.14 (t, *J* = 7.4 Hz, 1H), 4.35 (q, *J* = 7.1 Hz, 2H), 1.30 (t, *J* = 7.1 Hz, 3H); <sup>13</sup>C NMR (125 MHz, CDCl<sub>3</sub>): δ 160.2, 156.4, 155.0, 151.3, 148.5, 137.5, 132.8, 130.4, 129.5, 129.1, 127.6, 124.2, 119.9, 109.2, 61.0, 14.0; IR (KBr, cm<sup>-1</sup>): 3443, 2923, 1672, 1633, 1599, 1558, 1401, 1377, 1152, 1048, 757, 691. HRMS (ESI) *m/z* [M+H]<sup>+</sup> calcd for C<sub>20</sub>H<sub>18</sub>N<sub>5</sub>O<sub>2</sub> 360.1460, found 360.1461.

Ethyl 2-(benzylamino)-7-phenylimidazo[1,2-a][1,3,5]triazine-6-carboxylate (**3z**)

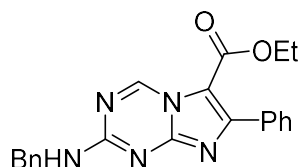

Yellow solid, 78.2 mg, 52% yield; mp: 189-190 °C; <sup>1</sup>H NMR (500 MHz, CDCl<sub>3</sub>): δ 9.65 (s, 1H), 7.90-7.89 (m, 2H), 7.45-7.41 (m, 3H), 7.39-7.38 (m, 2H), 7.36-7.27 (m, 3H), 6.21 (t, *J* = 5.6 Hz, 1H), 4.74 (d, *J* = 5.6 Hz, 2H), 4.33 (q, *J* = 7.1 Hz, 2H), 1.29 (t, *J* = 7.1 Hz, 3H); <sup>13</sup>C NMR (125 MHz, CDCl<sub>3</sub>): δ 160.2, 158.7, 154.7, 152.1, 148.5, 137.4, 132.9, 130.4, 129.4, 128.7, 128.0, 127.7, 127.5, 108.8, 60.8, 45.4, 14.0; IR (KBr, cm<sup>-1</sup>): 3250, 2987, 1685, 1643, 1479, 1376, 1350, 1192, 1154, 1050, 761, 694. HRMS (ESI) *m/z* [M+H]<sup>+</sup> calcd for C<sub>21</sub>H<sub>20</sub>N<sub>5</sub>O<sub>2</sub> 374.1617, found 374.1614.

Ethyl 2-(benzylamino)-7-hydroxy-7-phenyl-6,7-dihydroimidazo[1,2-a][1,3,5]triazine-6-carboxylate (**3z'**)

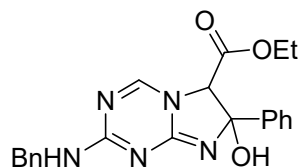

White solid; mp: 123-124 °C; <sup>1</sup>H NMR (500 MHz, CDCl<sub>3</sub>): δ 13.42 (s, 1H), 9.33 (s, 1H), 8.64 (t, *J* = 5.6 Hz, 1H), 8.47 (s, 1H), 7.93-7.92 (m, 2H), 7.47-7.34 (m, 8H), 7.33-7.28 (m, 1H), 4.64 (d, *J* = 5.6 Hz, 2H), 4.30 (q, *J* = 7.1 Hz, 2H), 1.32 (t, *J* = 7.1 Hz, 3H); <sup>13</sup>C NMR (125 MHz, CDCl<sub>3</sub>): δ 161.6, 160.1, 151.4, 150.5, 144.8, 137.7, 133.3, 129.2, 128.8, 128.4, 127.8, 127.6, 113.0, 60.6,

44.9, 14.3; IR (KBr,  $\text{cm}^{-1}$ ): 3315, 2929, 1703, 1634, 1538, 1382, 1149, 698. HRMS (ESI)  $m/z$

$[\text{M}+\text{H}]^+$  calcd for  $\text{C}_{21}\text{H}_{22}\text{N}_5\text{O}_3$  392.1723, found 392.1725.

Ethyl 2-bromo-3-oxo-3-phenylpropanoate (**4**)<sup>2</sup>

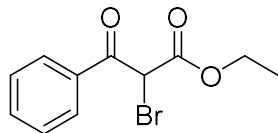

Yellow oil liquid;  $^1\text{H}$  NMR (500 MHz,  $\text{CDCl}_3$ ):  $\delta$  8.01-8.00 (m, 2H), 7.65-7.63 (m, 1H), 7.52-7.50 (m, 2H), 5.67 (s, 1H), 4.30 (q,  $J = 7.1$  Hz, 2H), 1.26 (t,  $J = 7.1$  Hz, 3H).

Ref.

(1) Li, J. J.; Song, C.; Cui, D.-M.; Zhang, C. *Org. Biomol. Chem.*, **2017**, *15*, 5564- 5570

(2) Khan, A. T.; Ali, M. A.; Goswami, P.; Choudhury L. H. *J. Org. Chem.*, **2006**, *71*, 8961-8963.

170502  
sc171426 CDC13 0502

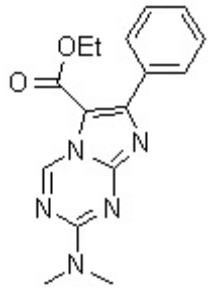

3a

9.6957

7.9184  
7.9130  
7.9095  
7.9065  
7.9060  
7.9018  
7.8990  
7.4251  
7.4191  
7.4148  
7.4122  
7.2766

4.3444  
4.3302  
4.3159  
4.3017

3.3380  
3.2871

1.3044  
1.2901  
1.2758

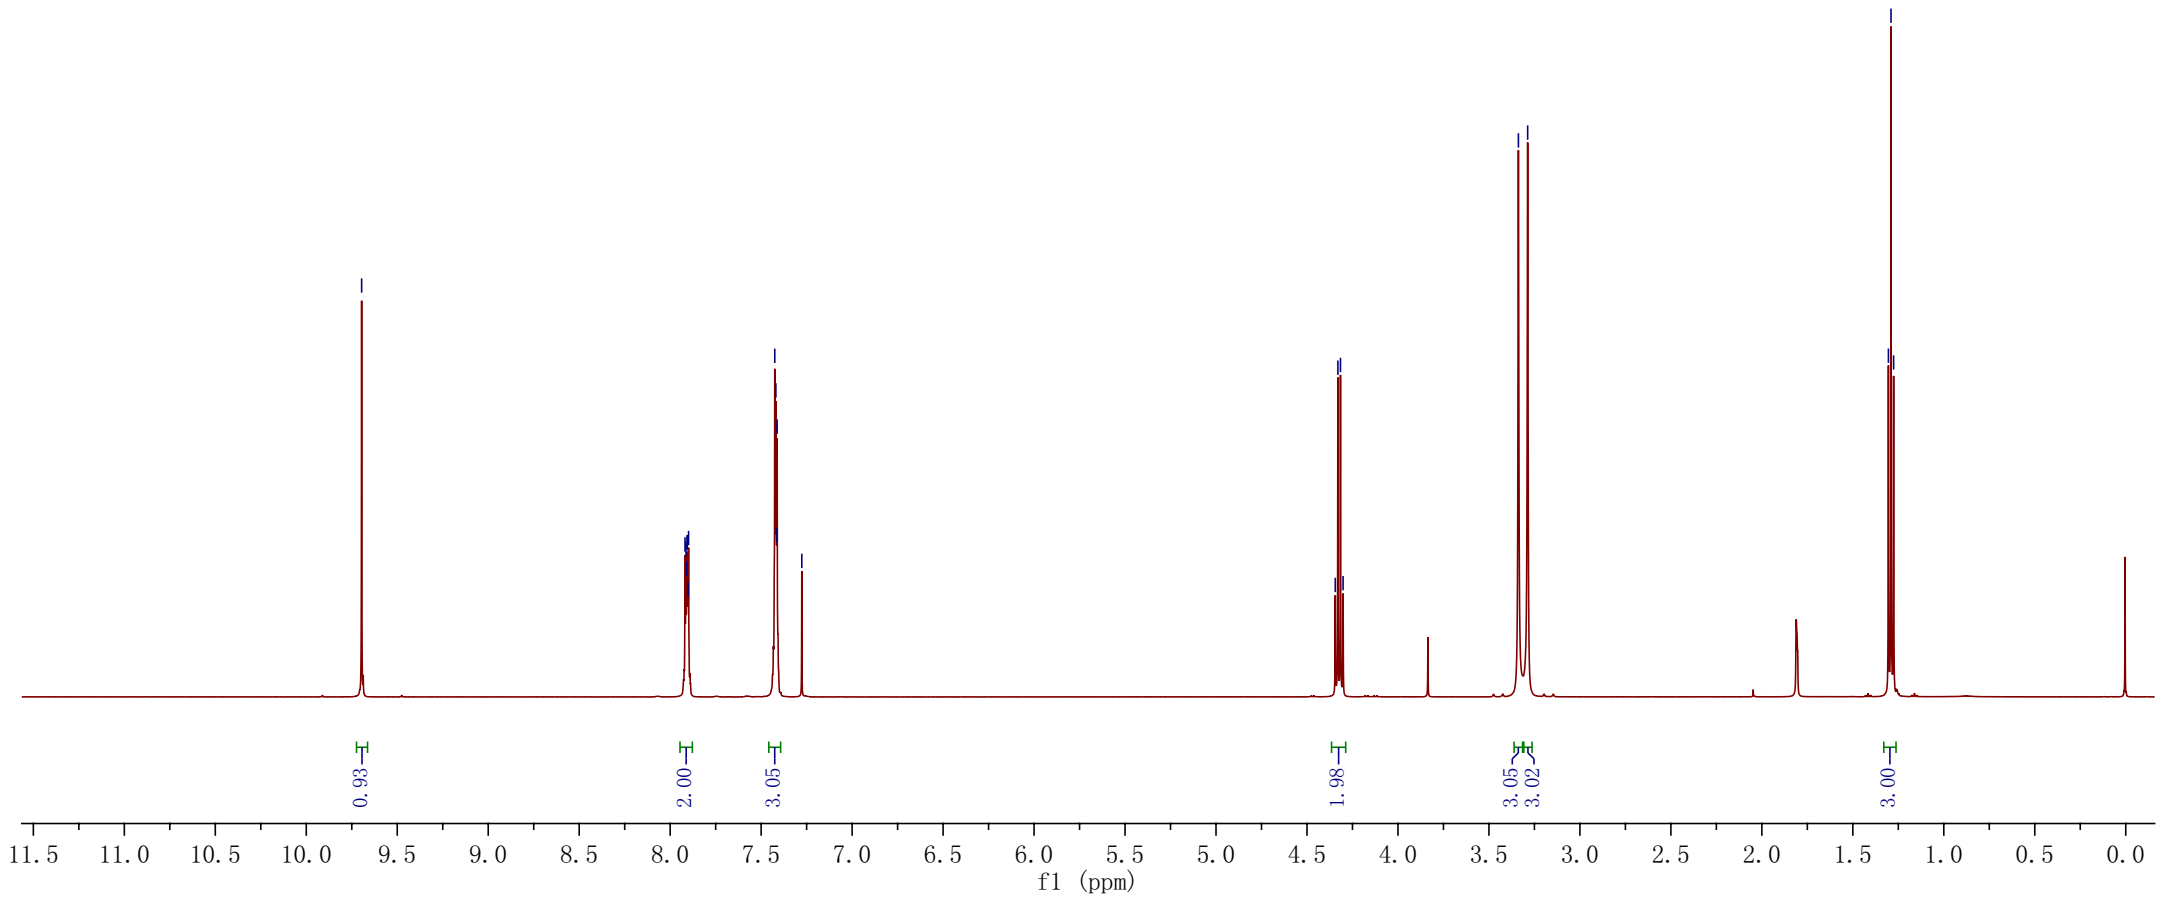

170503  
SC170426 CDC13 0503

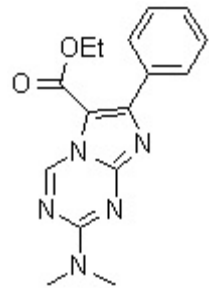

3a

160.2396  
158.6717  
155.0906  
152.5806  
147.8289  
133.1282  
130.4102  
129.3308  
127.4434  
108.0048  
77.2870  
77.0327  
76.7786  
60.6748  
37.3985  
37.1501  
14.0651

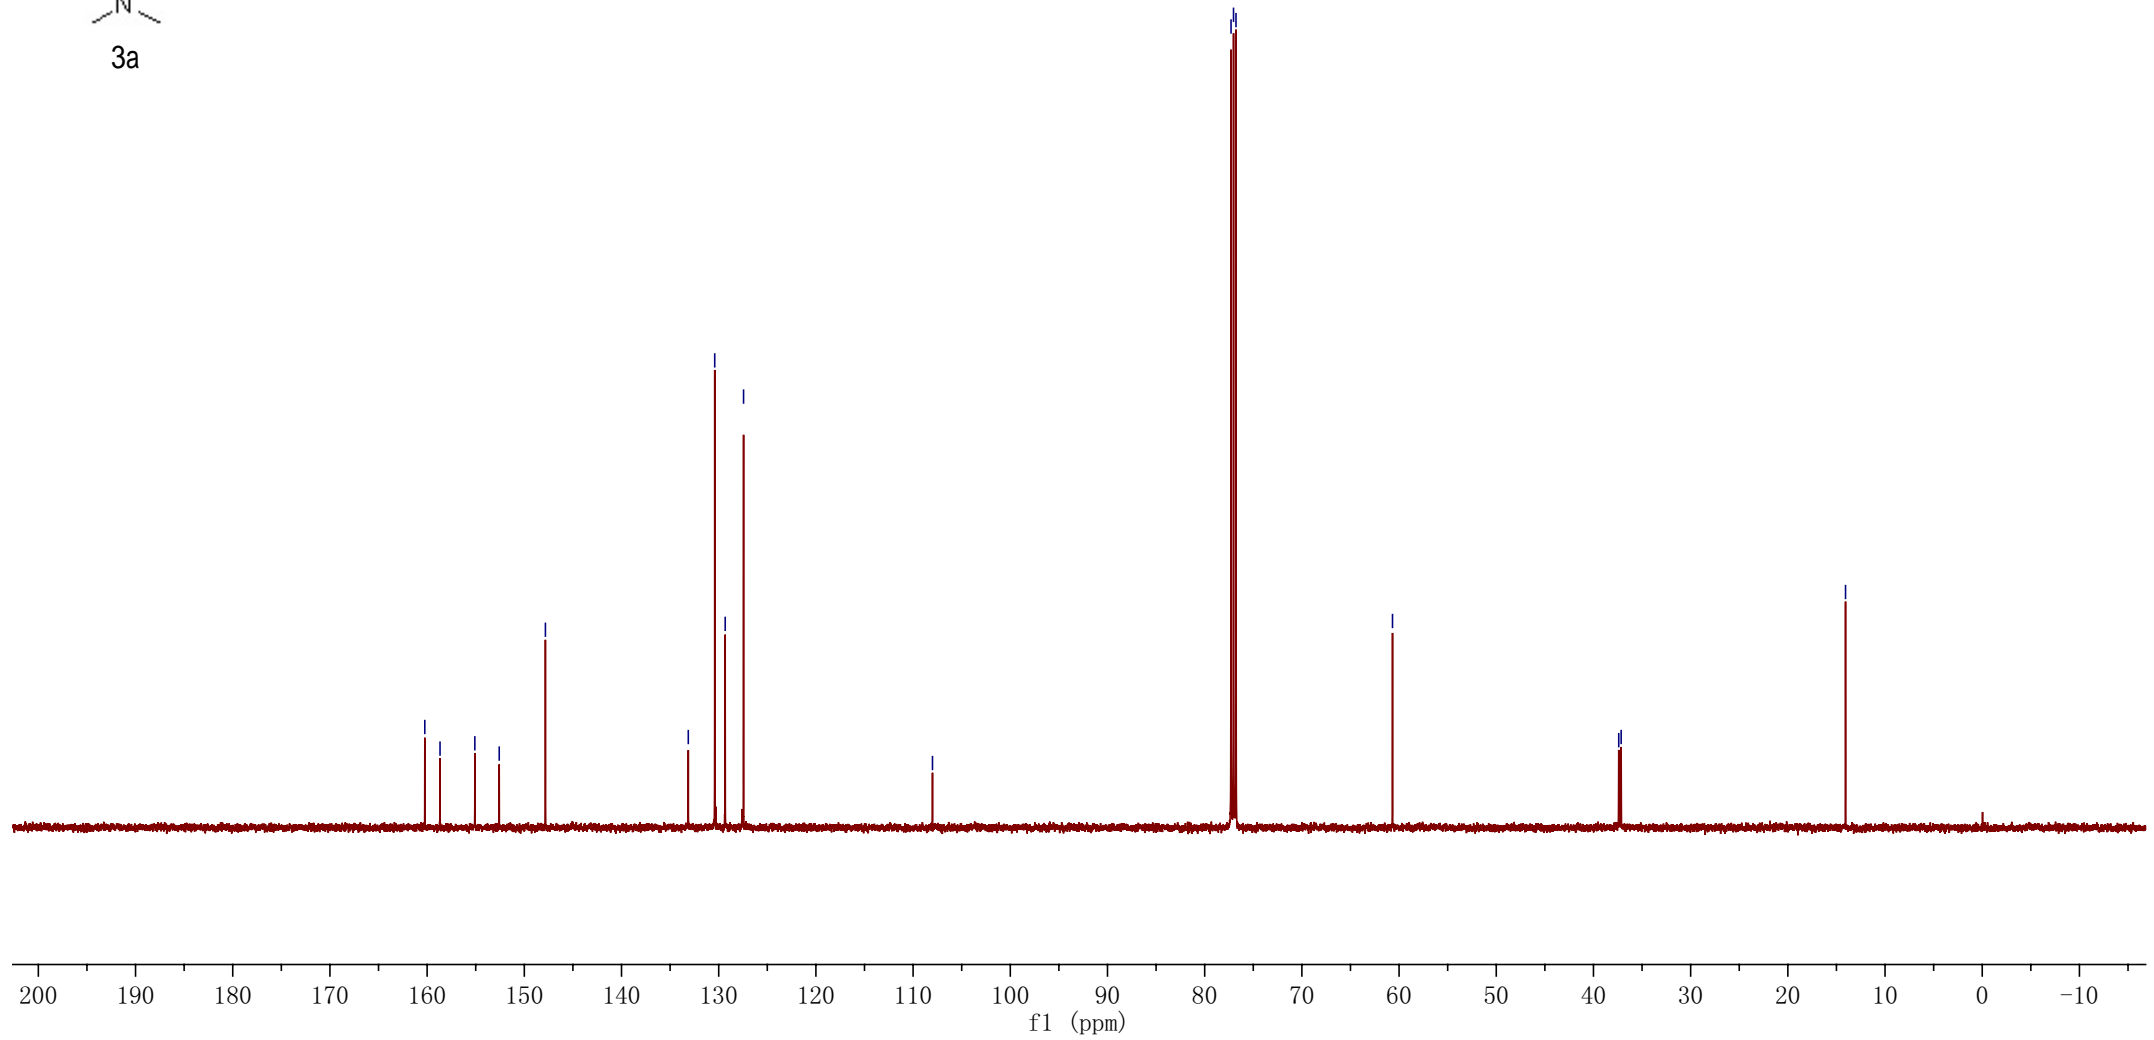

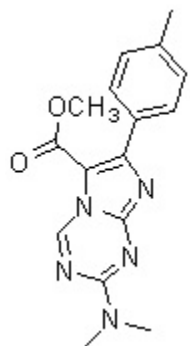

3b

9.6681

7.8244  
7.8081

7.2454  
7.2296

3.8388

3.3287  
3.2801

2.4109

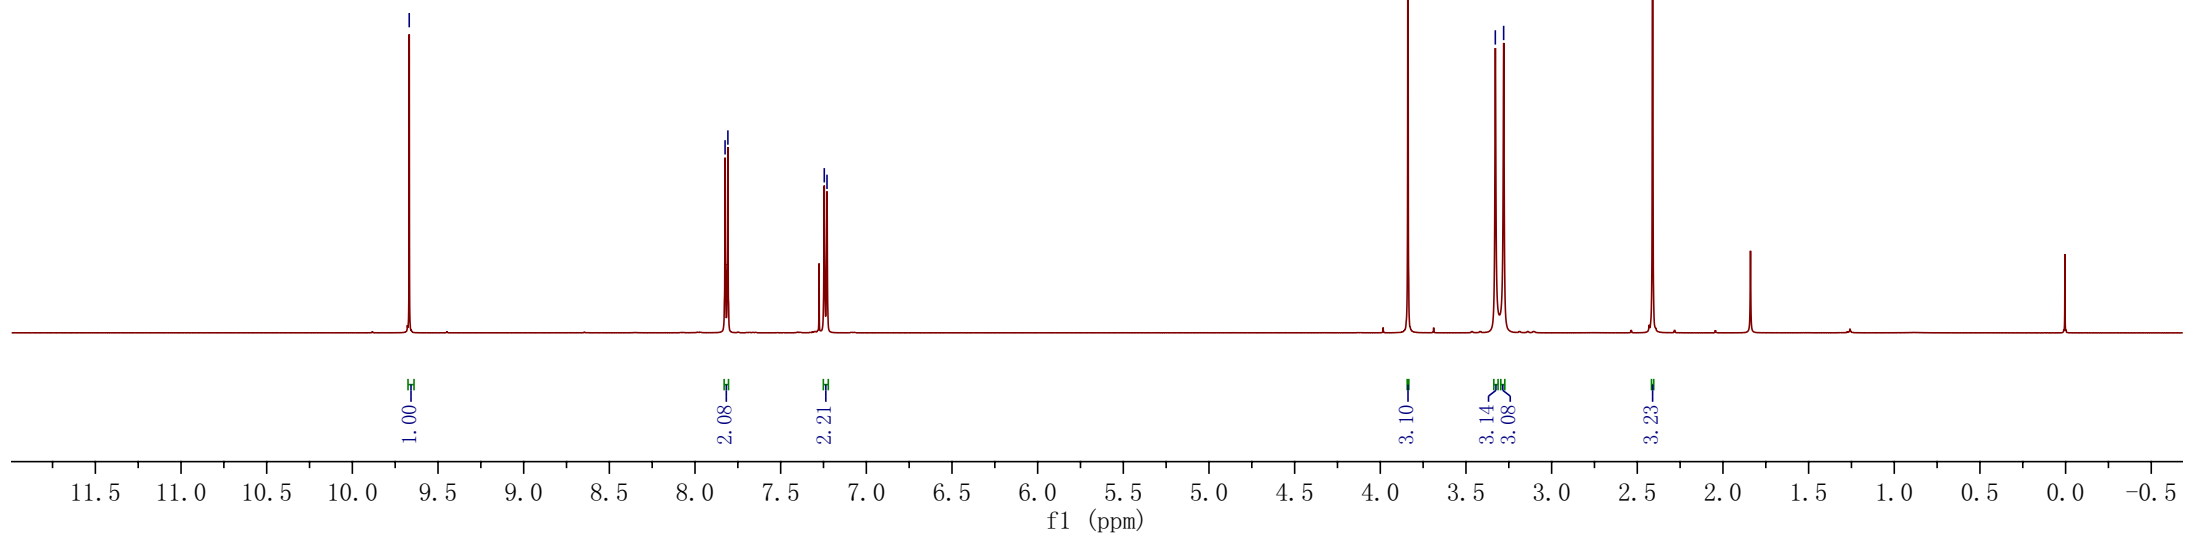

170918  
SC160620A CDC13 0918

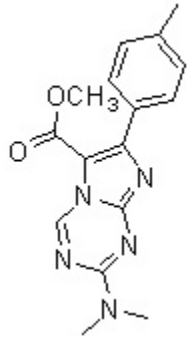

3b

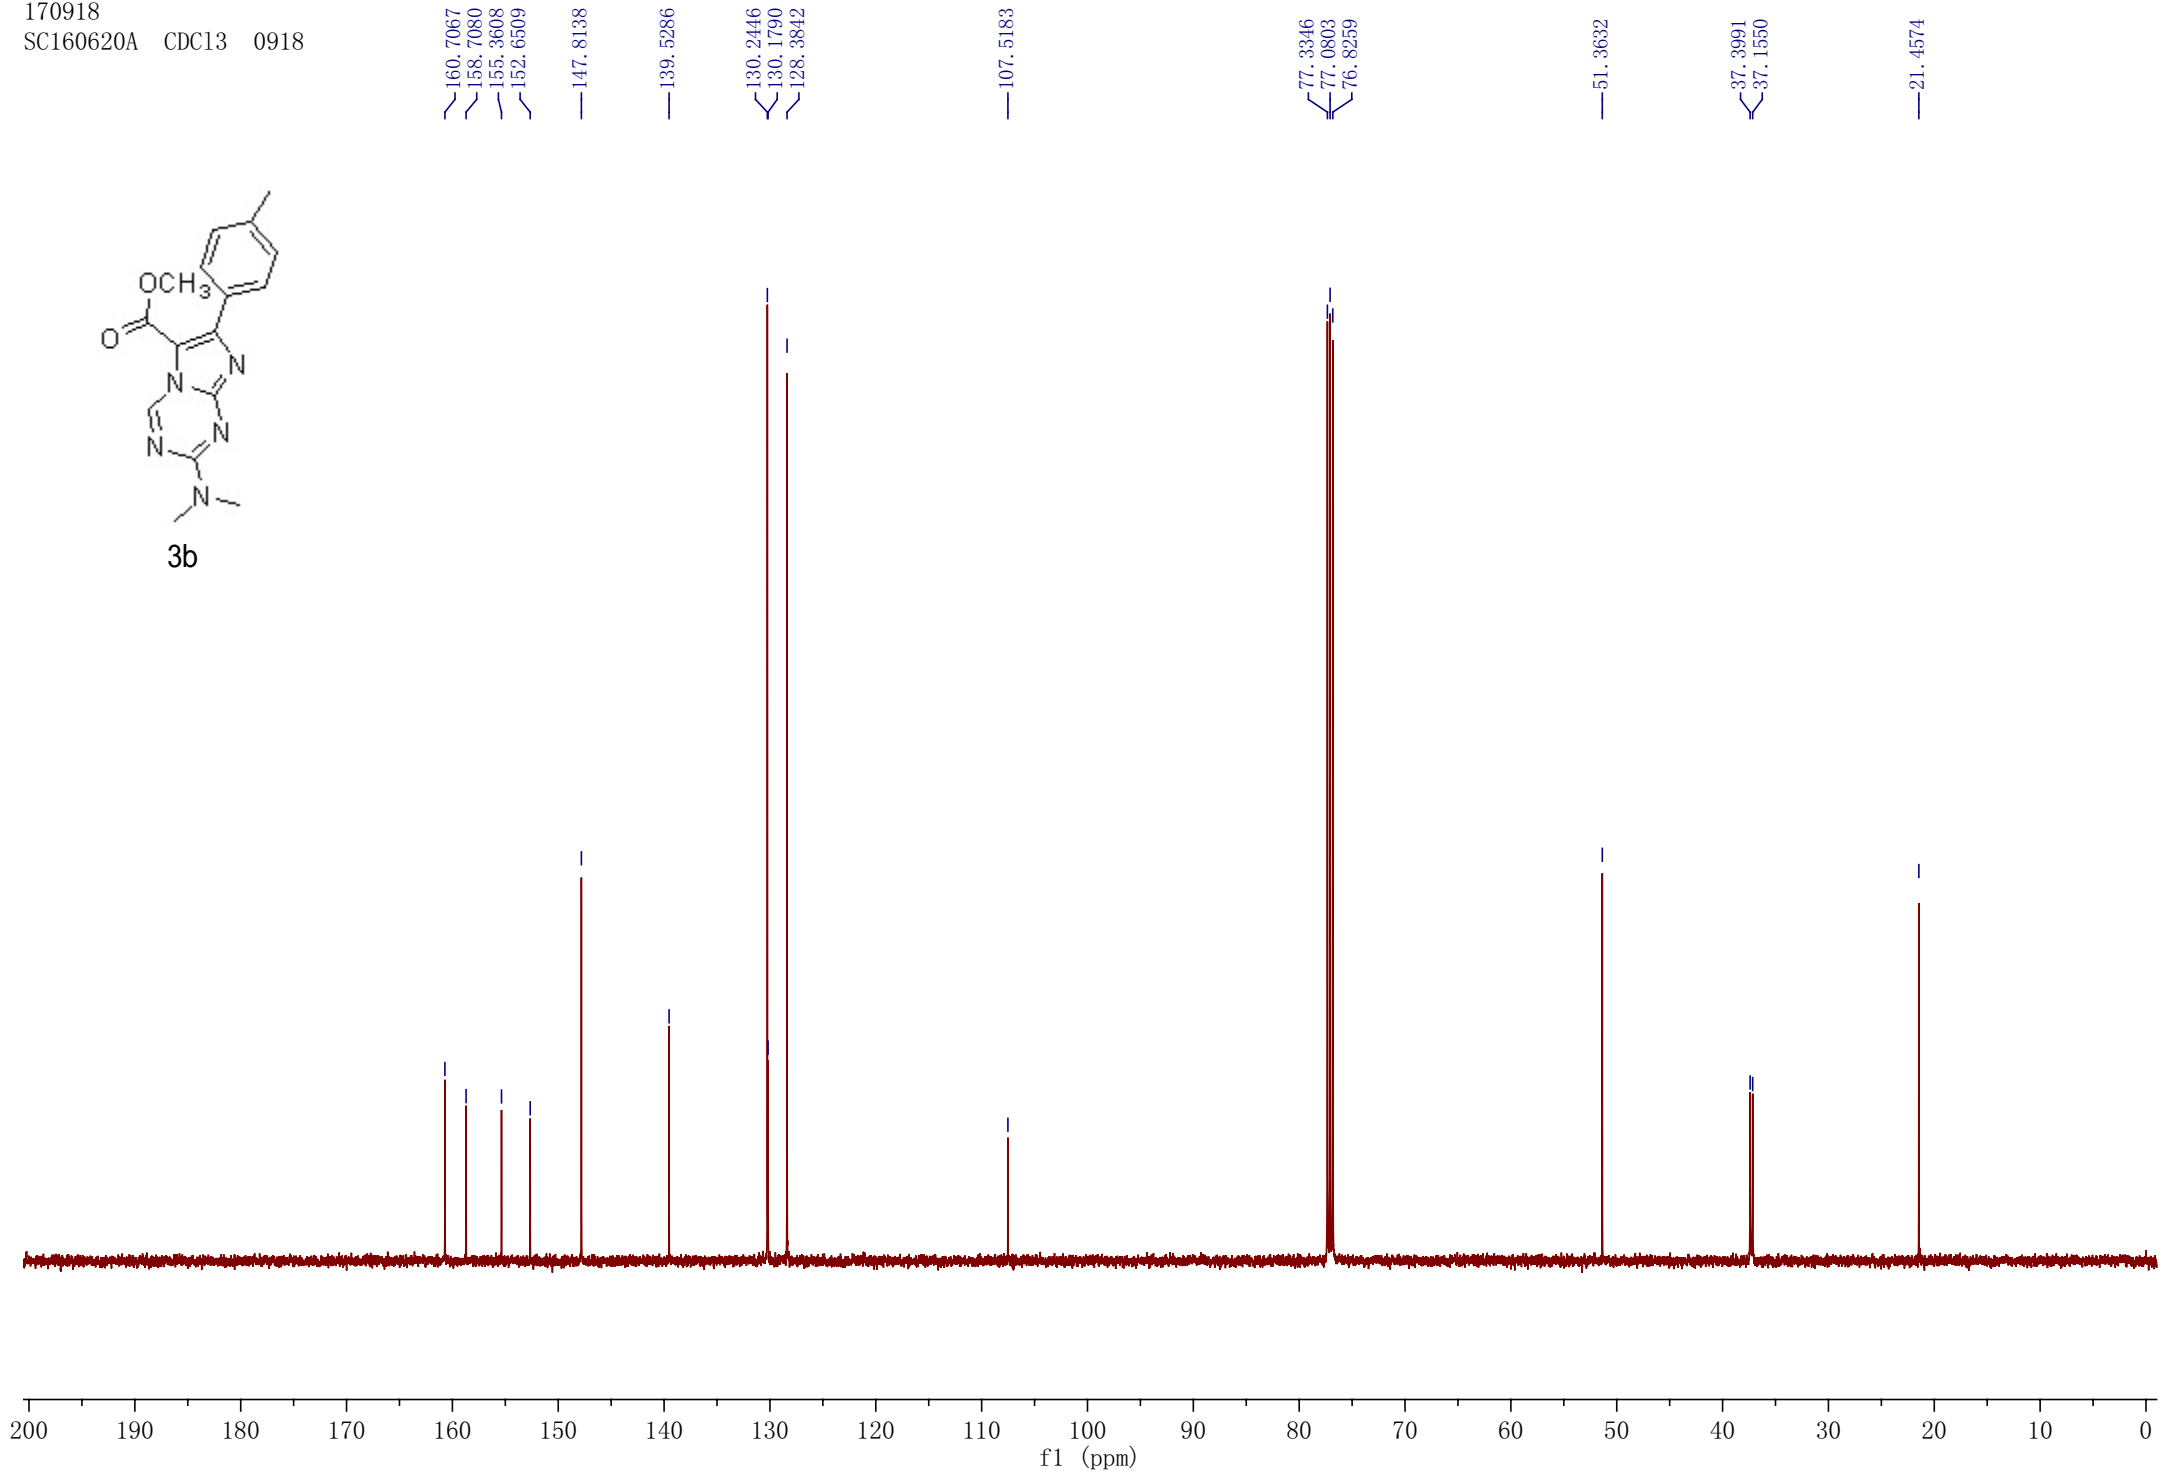

170609  
SC170608A CDC13 0609

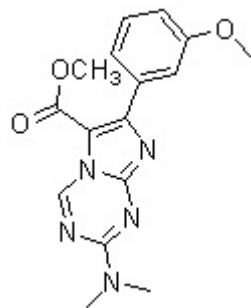

3c

9.6755

7.4871  
7.4716  
7.4667  
7.3393  
7.3233  
7.3077  
7.2762  
6.9858  
6.9819  
6.9808  
6.9708  
6.9688  
6.9660  
6.9641

3.8461  
3.8333

3.3263  
3.2761

1.00

2.19

1.14

1.10

3.24  
3.24

3.04  
3.08

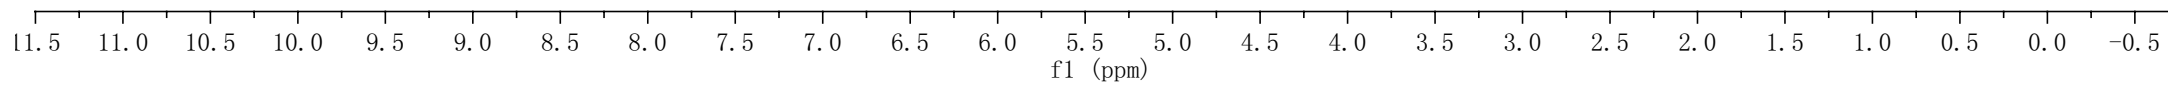



170612  
SC170608A CDC13 0612

160.61  
158.99  
158.69  
154.91  
152.59  
147.82

134.30  
128.54  
122.92  
115.94  
115.04  
107.85

77.34  
77.08  
76.83

55.35  
51.43

37.42  
37.16

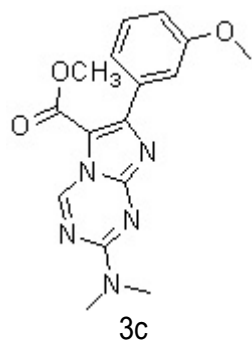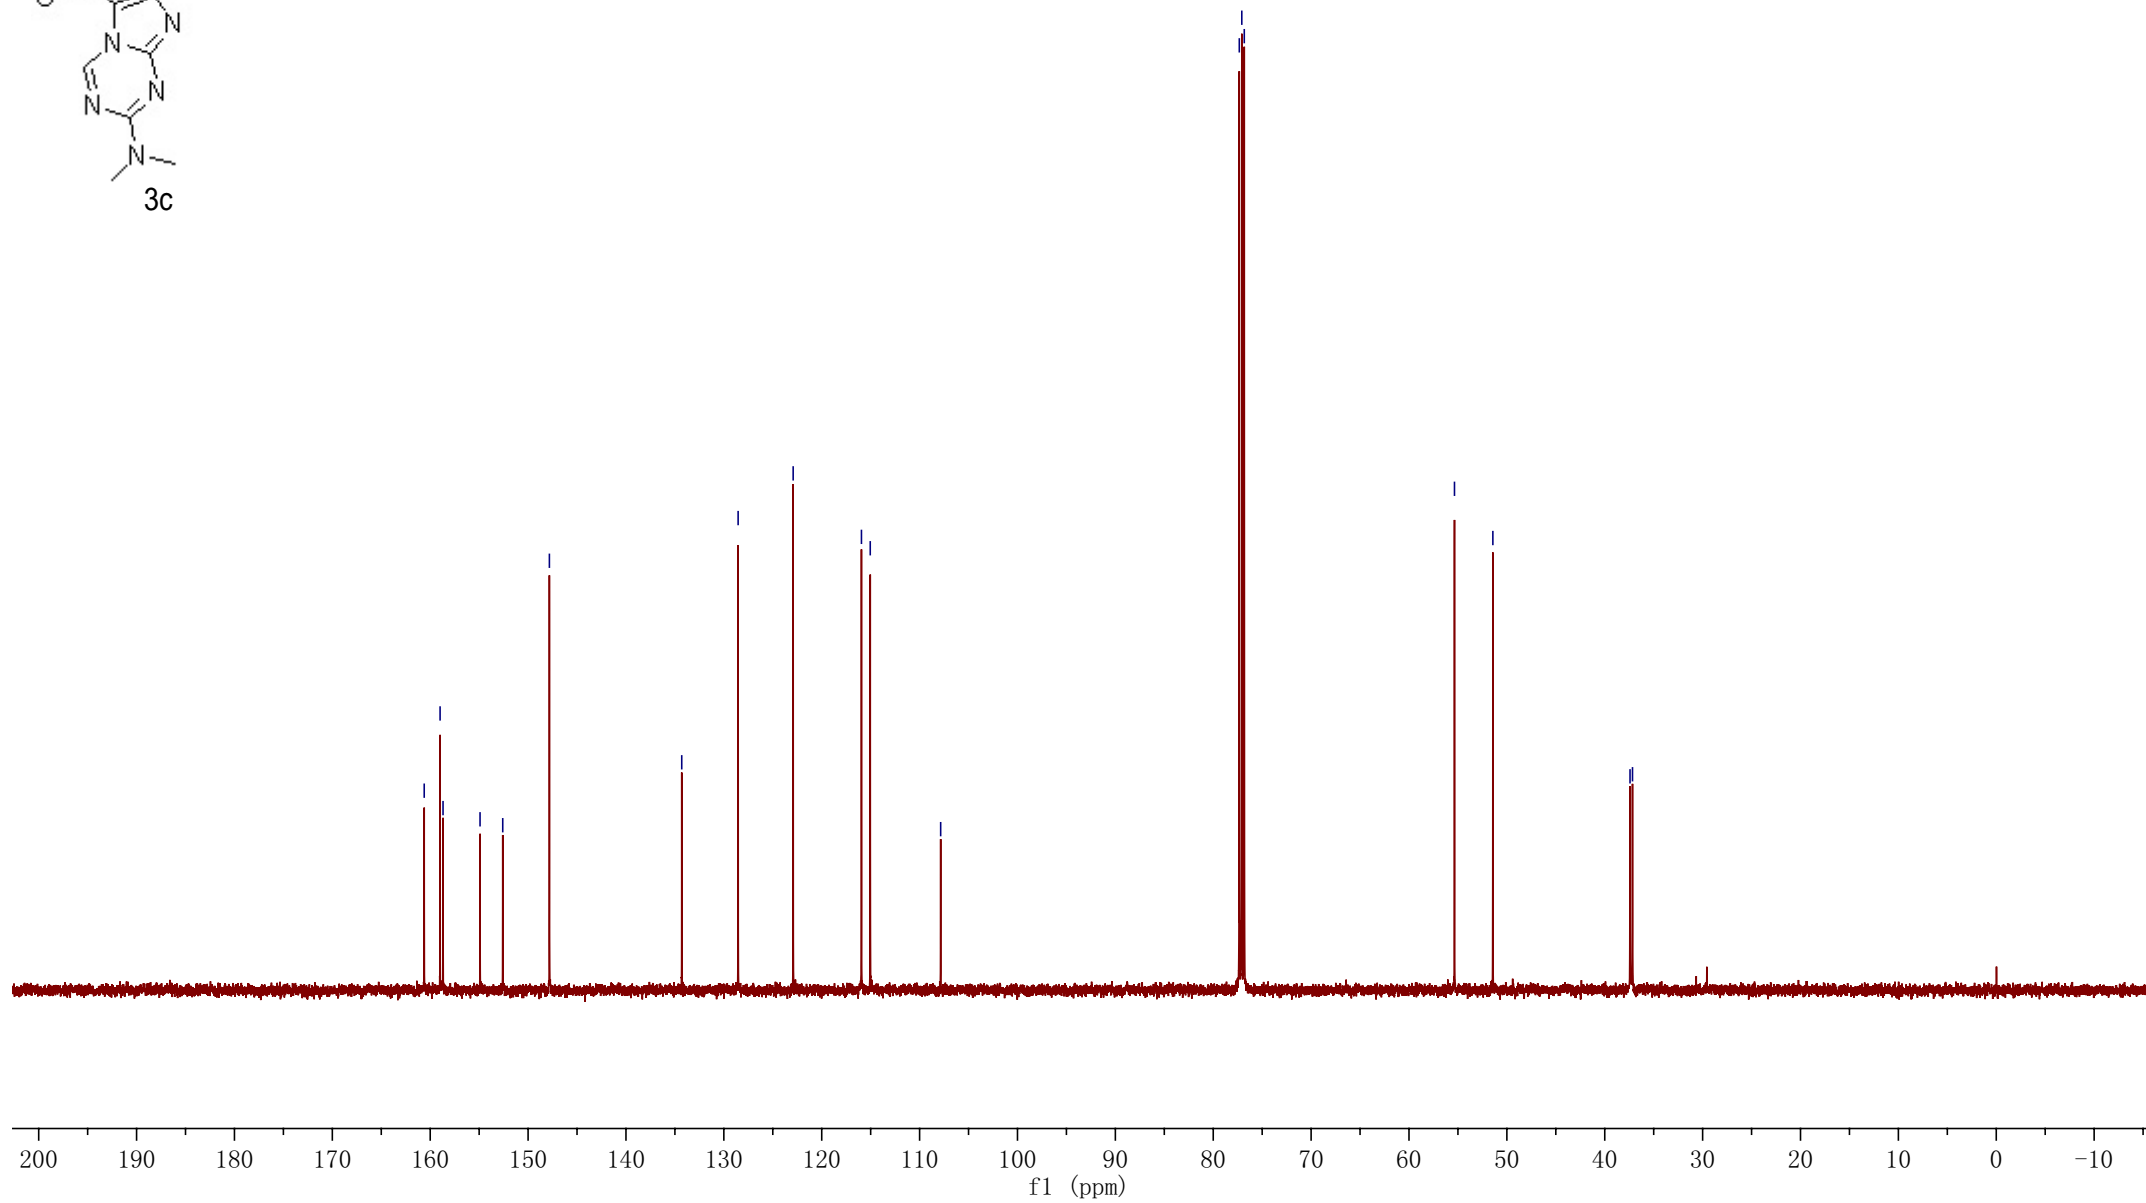

9.6618

7.6102  
7.6063  
7.5935  
7.5896  
7.5828  
7.5792

6.9384  
6.9217

3.9449  
3.9402  
3.8695

3.3358  
3.2874

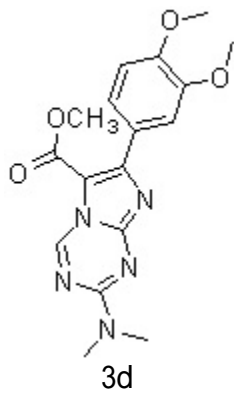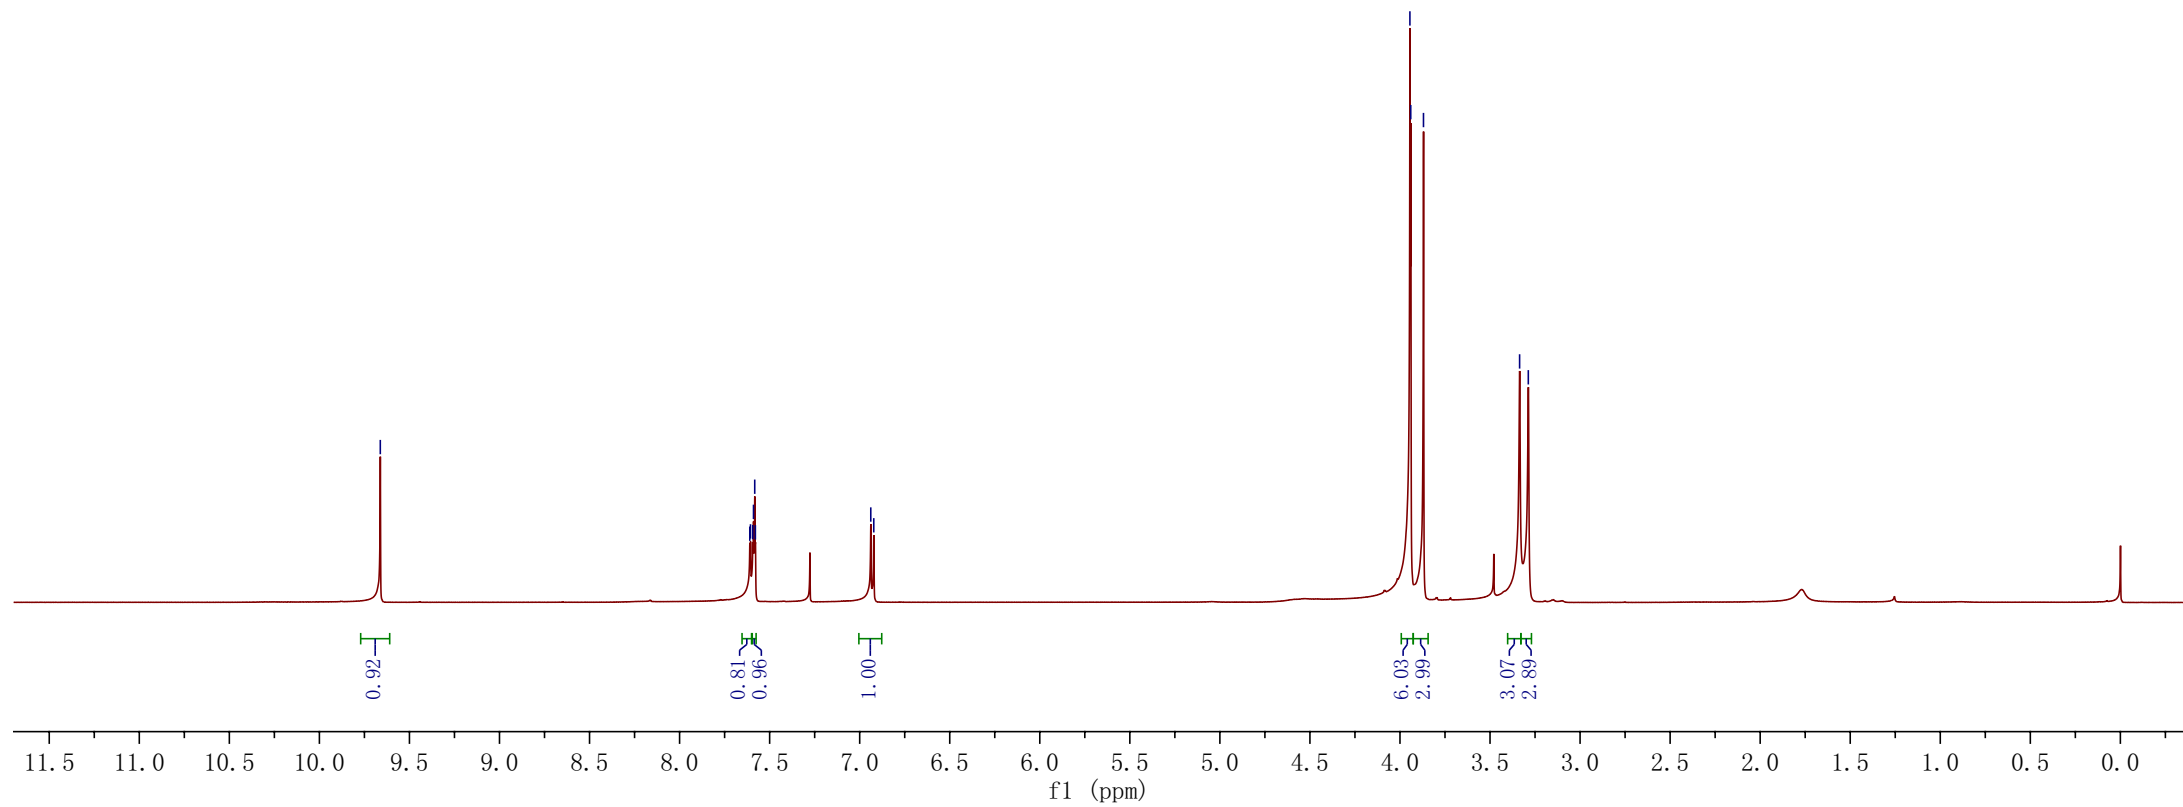

170918  
SC170629A CDC13 0918

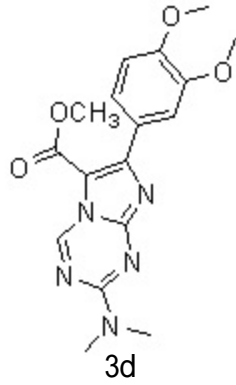

160.6556  
158.7295  
155.0718  
152.6081  
150.2514  
148.1604  
147.8584

125.5274  
123.7478

113.4690  
110.1625  
107.2850

77.3337  
77.0795  
76.8250

55.9753  
55.8903  
51.4040

37.4314  
37.1904

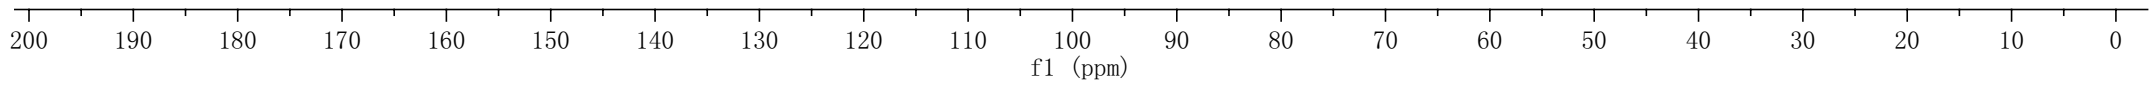

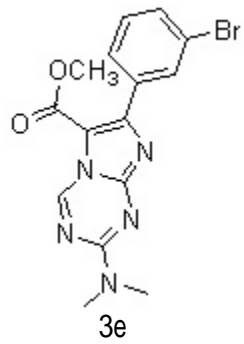

9.6757

8.0979  
8.0944  
8.0909  
7.8615  
7.8591  
7.8565  
7.8459  
7.8432  
7.8409  
7.5647  
7.5628  
7.5609  
7.5588  
7.5488  
7.5468  
7.5449  
7.5428  
7.3185  
7.3027  
7.2869  
7.2758

3.8643

3.3468  
3.2918

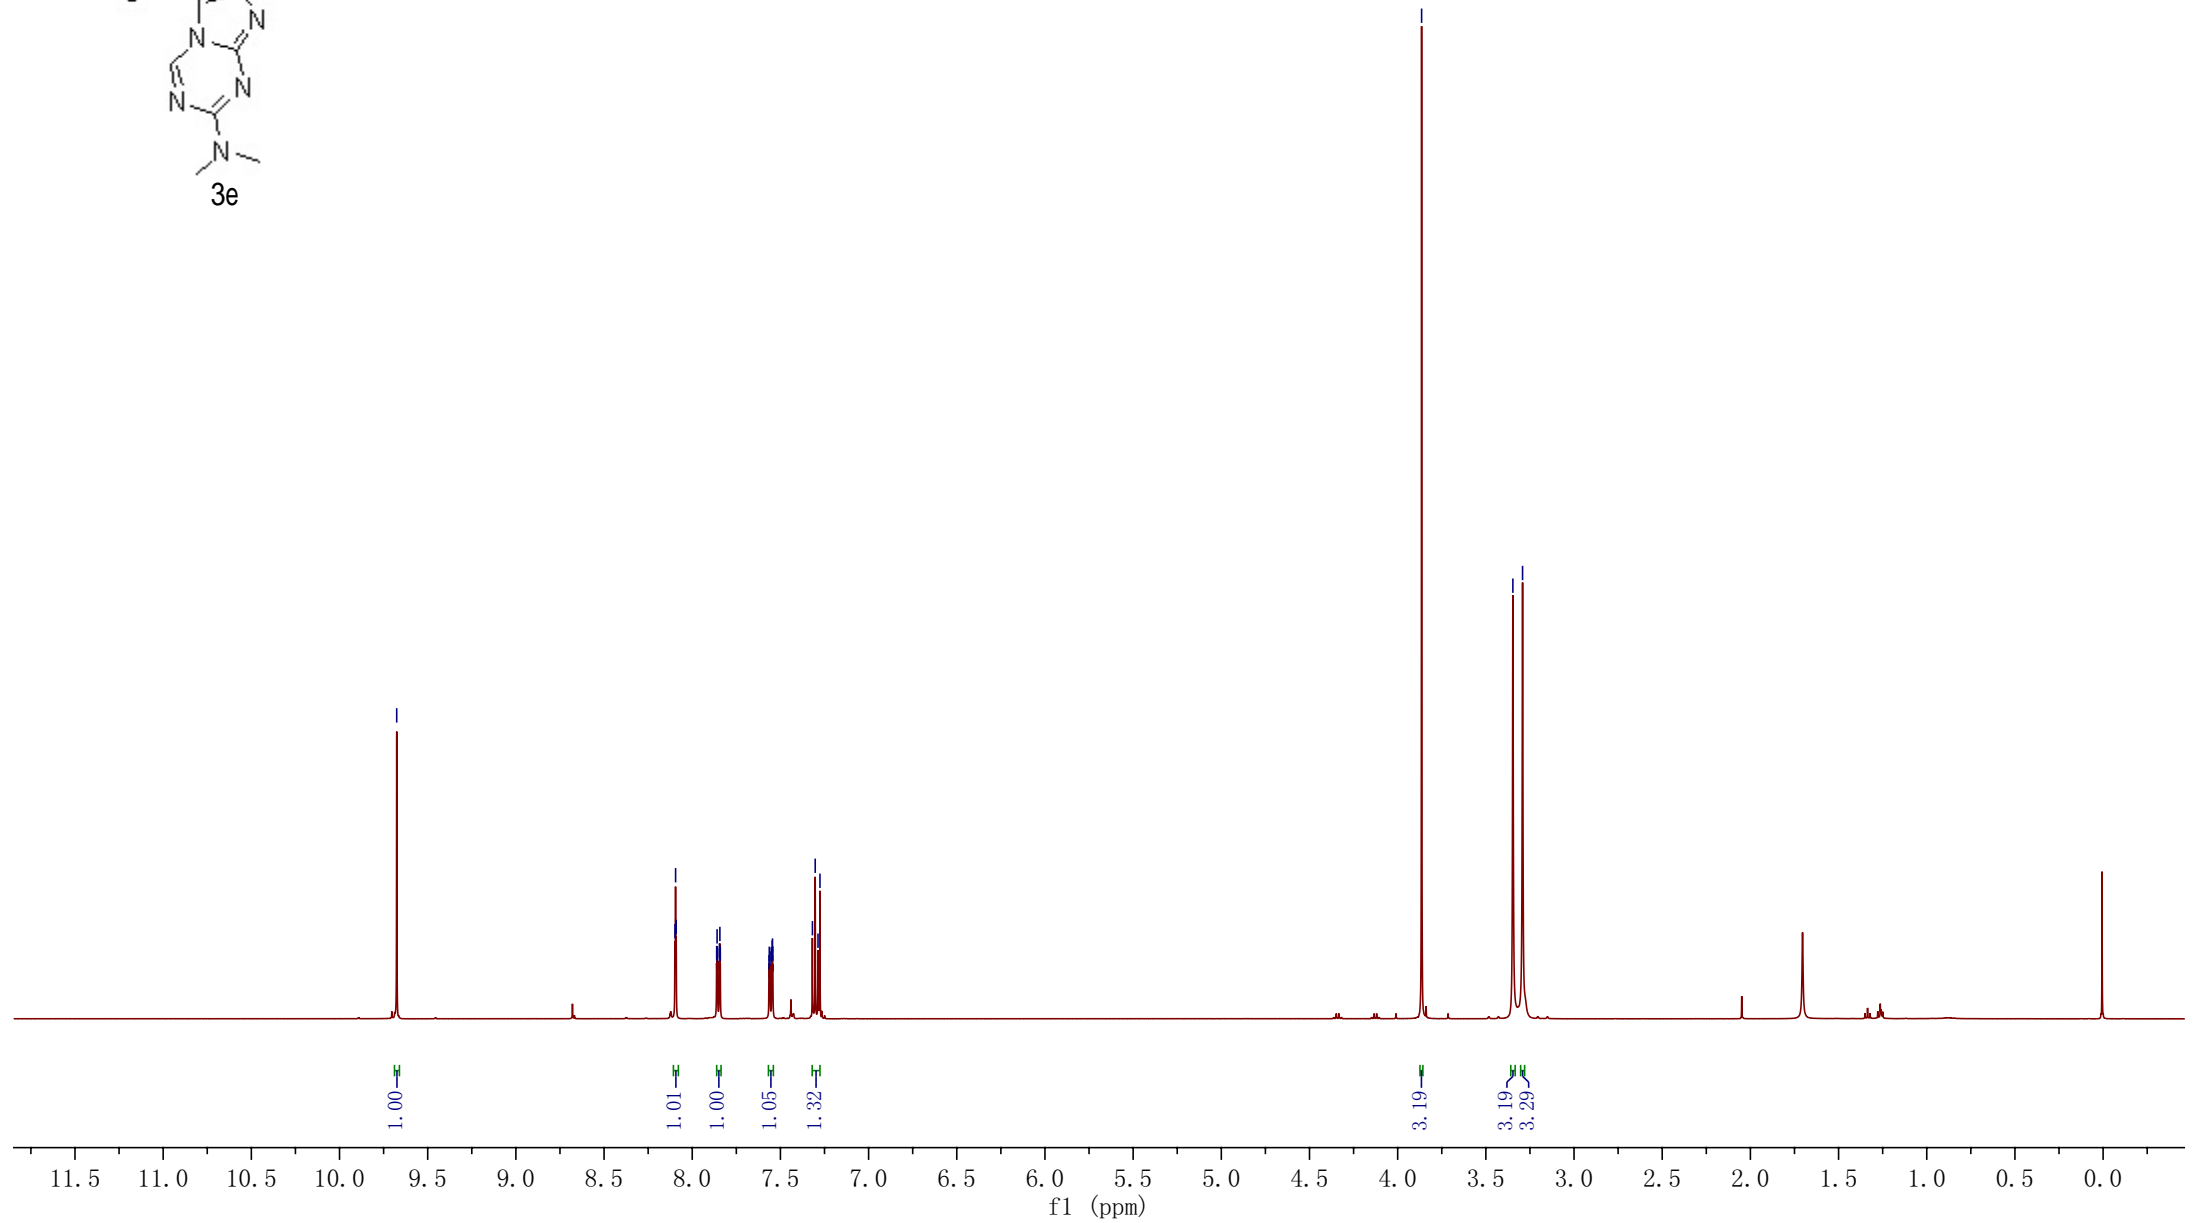

170918  
SC170712A CDC13 0918

160.3815  
158.7484

153.3363  
152.6934  
147.8433

135.1112  
133.3013  
132.3165  
129.1830  
128.9179

121.6778

108.1060

77.3352  
77.0812  
76.8270

51.5924

37.4938  
37.2303

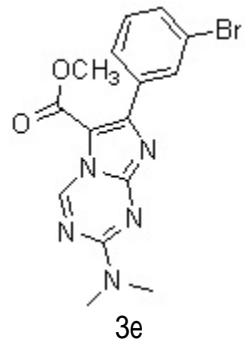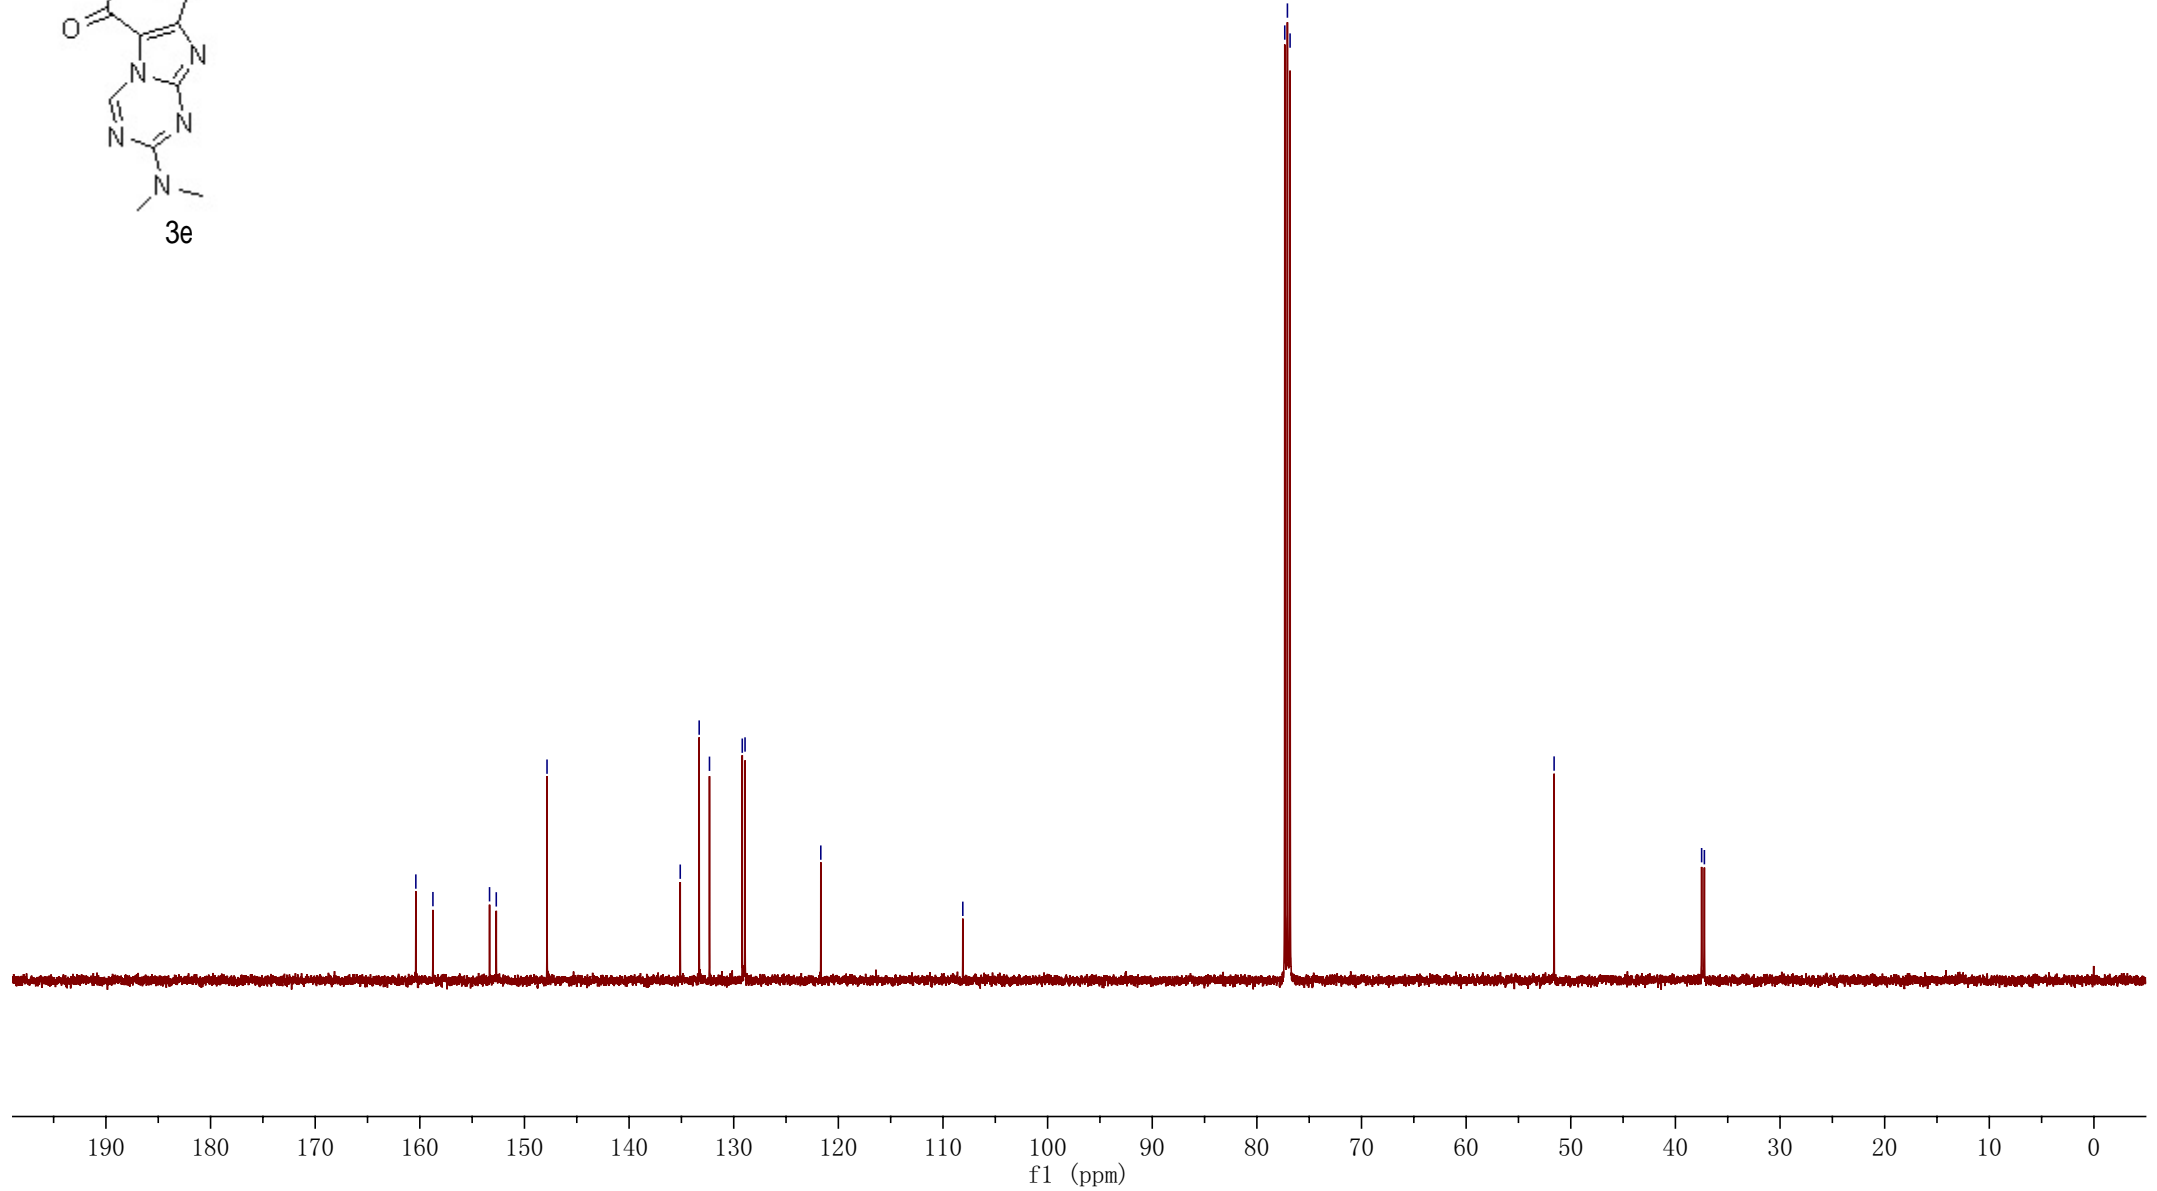

170619  
SC170612A CDC13 0619

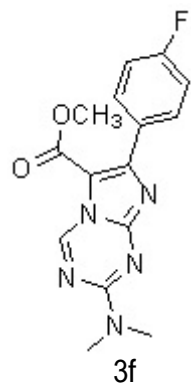

9.6560

7.9298  
7.9187  
7.9120  
7.9010

7.1305  
7.1130  
7.0954

3.8458

3.3369  
3.2830

0.97

2.08

2.14

3.00

3.03  
3.07

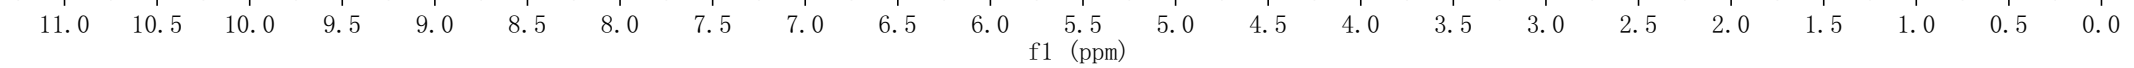

170620  
SC170612A CDC13 0620

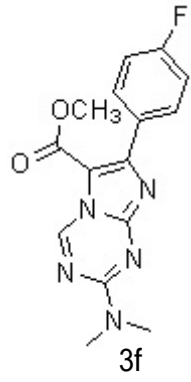

164.5301  
162.5480  
160.4515  
158.7135  
154.2253  
152.6386  
147.8146

132.3389  
132.2718  
129.1514  
129.1254

114.7527  
114.5803  
107.6480

77.2875  
77.0334  
76.7793

51.4431

37.4169  
37.1585

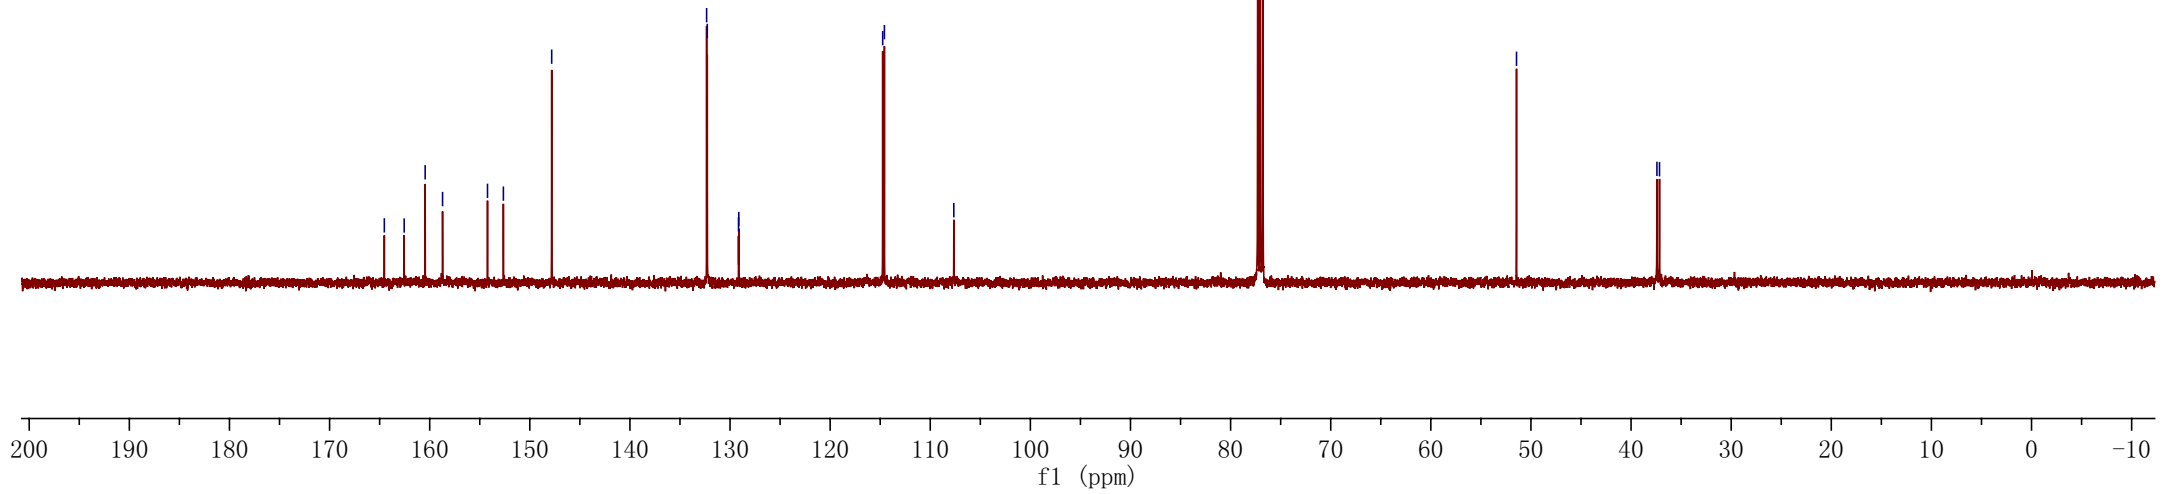

170609  
SC170605B CDC13 0609

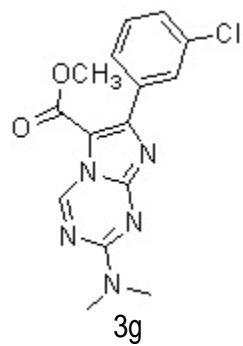

9.6680

7.9301  
7.9267  
7.9231  
7.8075  
7.8048  
7.8019  
7.7924  
7.7898  
7.7870  
7.4083  
7.4056  
7.4018  
7.3923  
7.3889  
7.3858  
7.3717  
7.3564  
7.3406  
7.2759

3.8555

3.3394  
3.2848

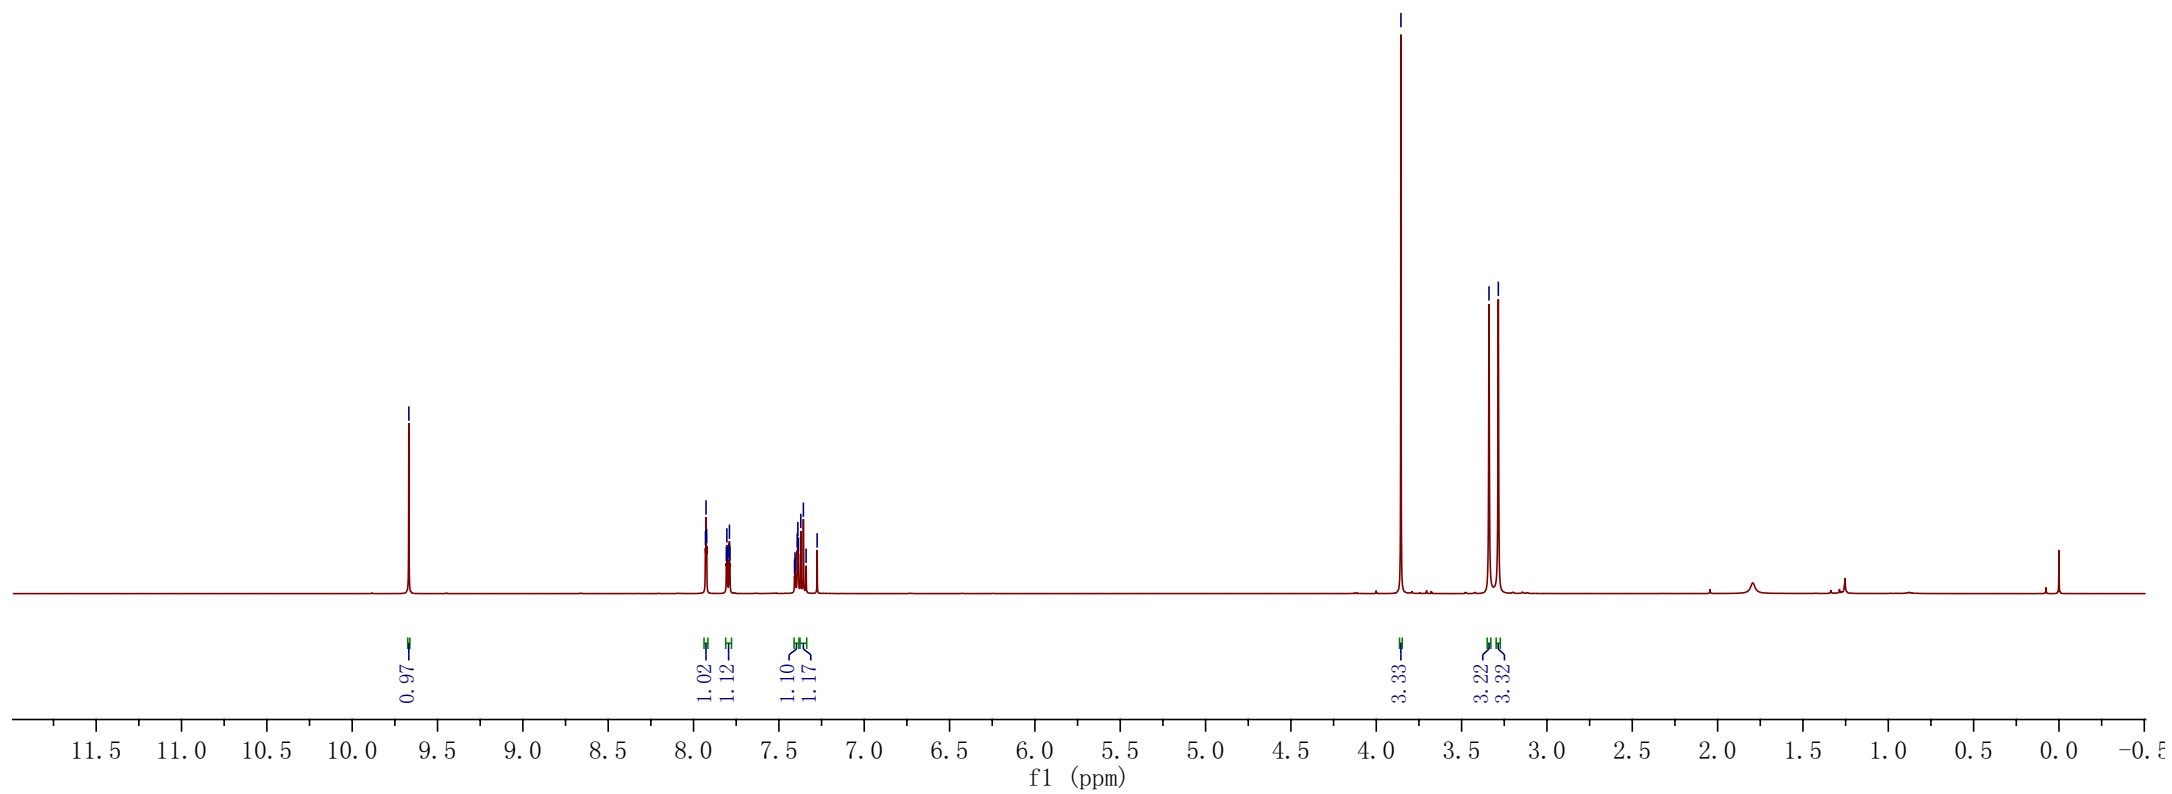



170612  
SC170605B CDC13 0612

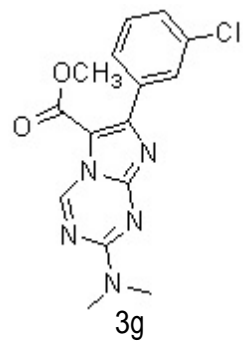

160.3154  
158.6728

153.4079  
152.6201

147.7804

134.8088  
133.5447  
130.3459  
129.3455  
128.8480  
128.4100

108.0352

77.2862  
77.0321  
76.7779

51.5218

37.4213  
37.1578

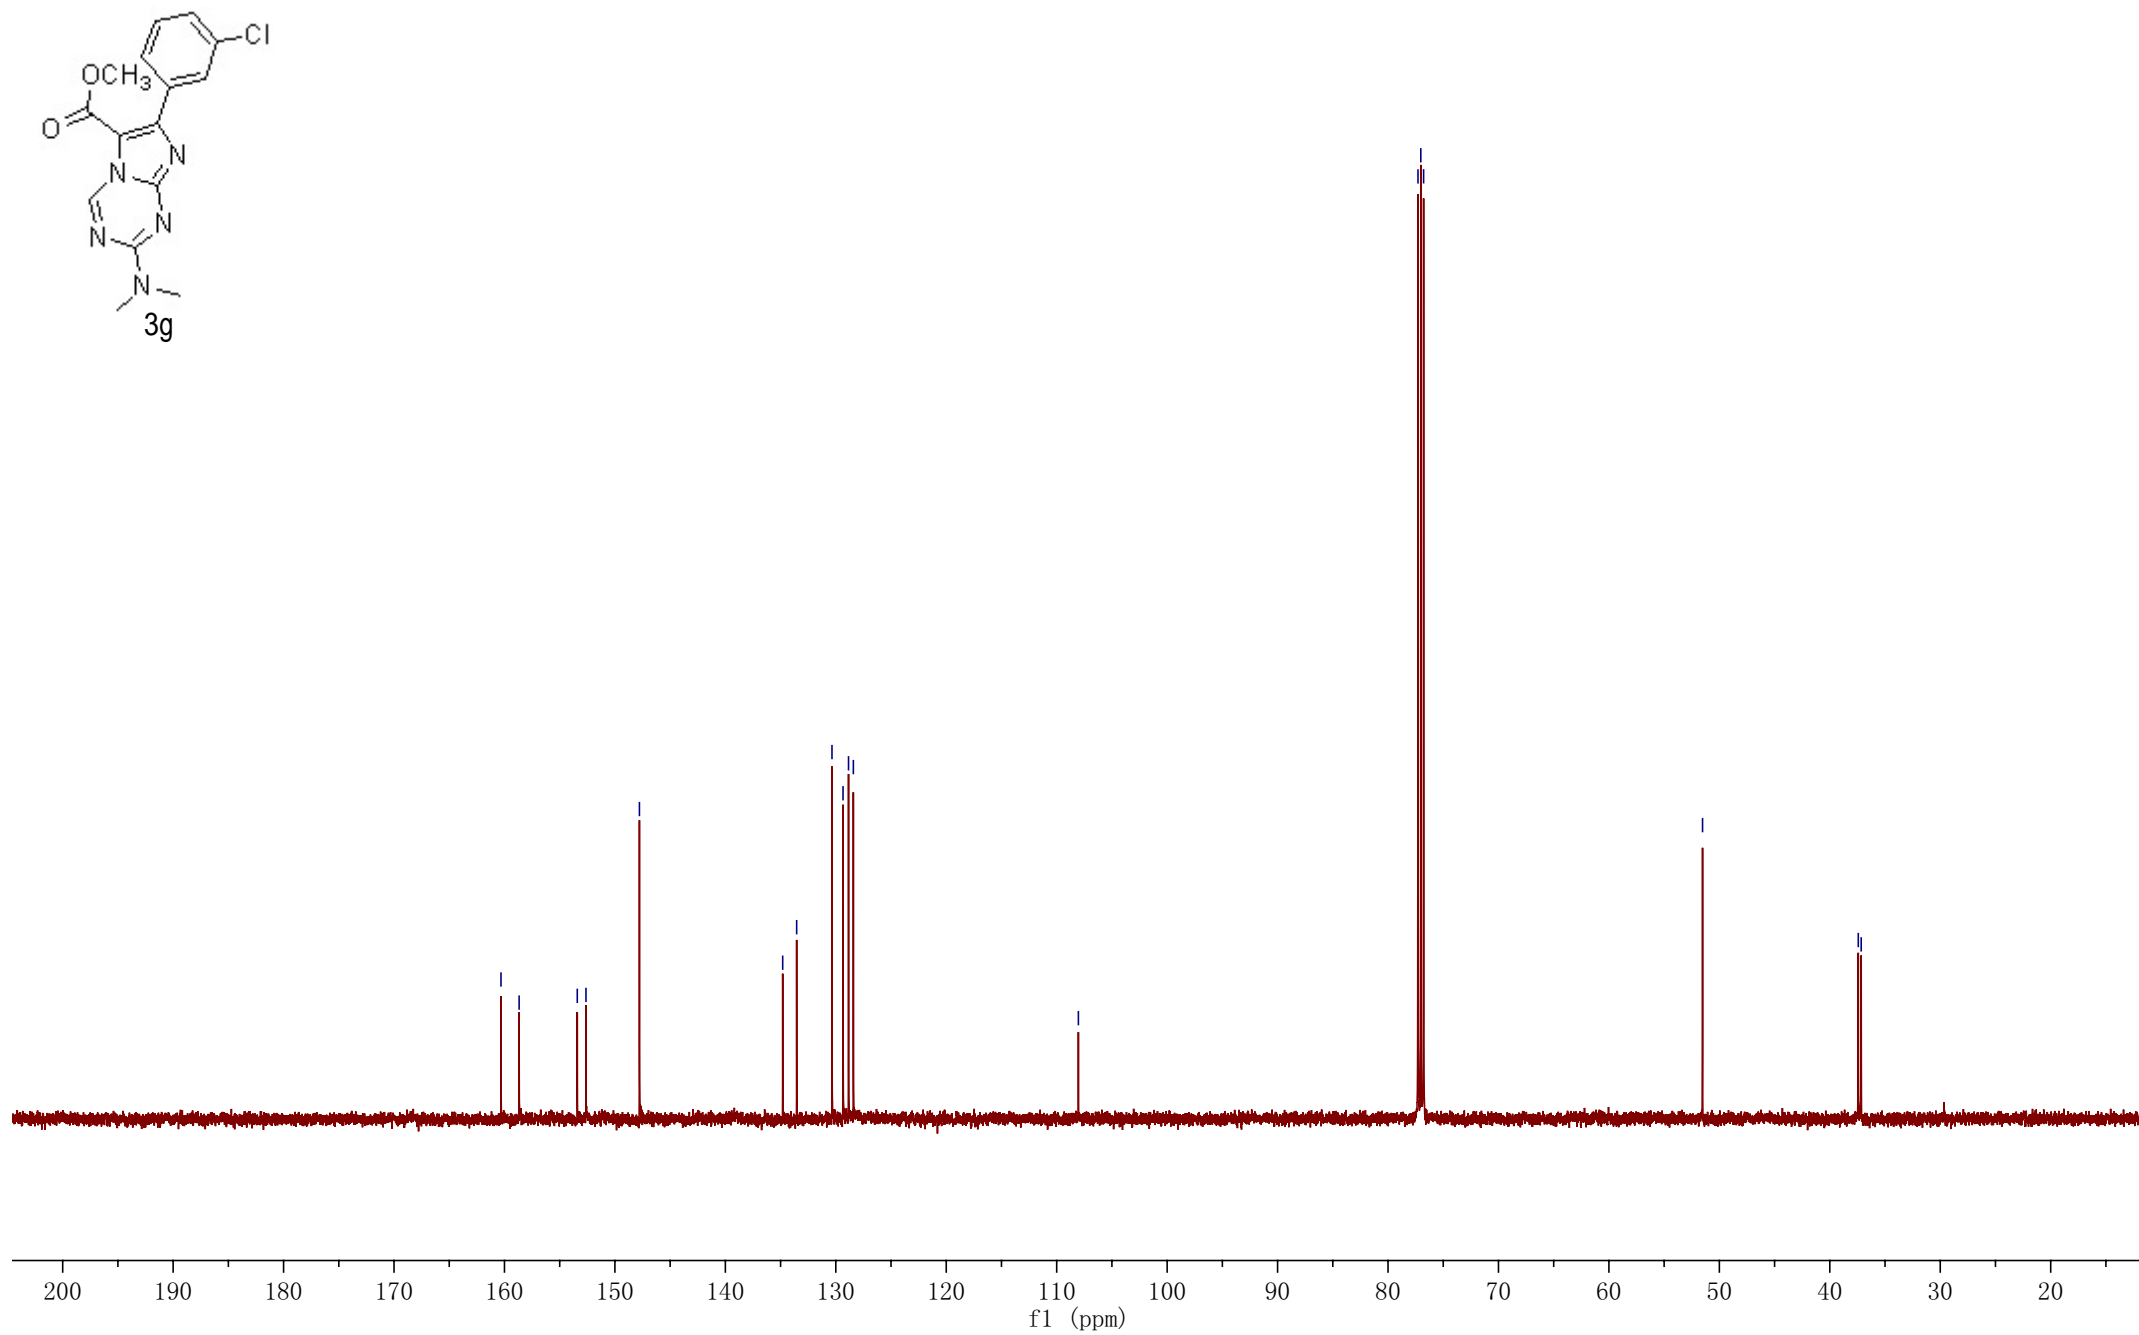

171031  
SC170717B CDC13

1030

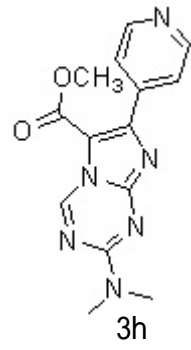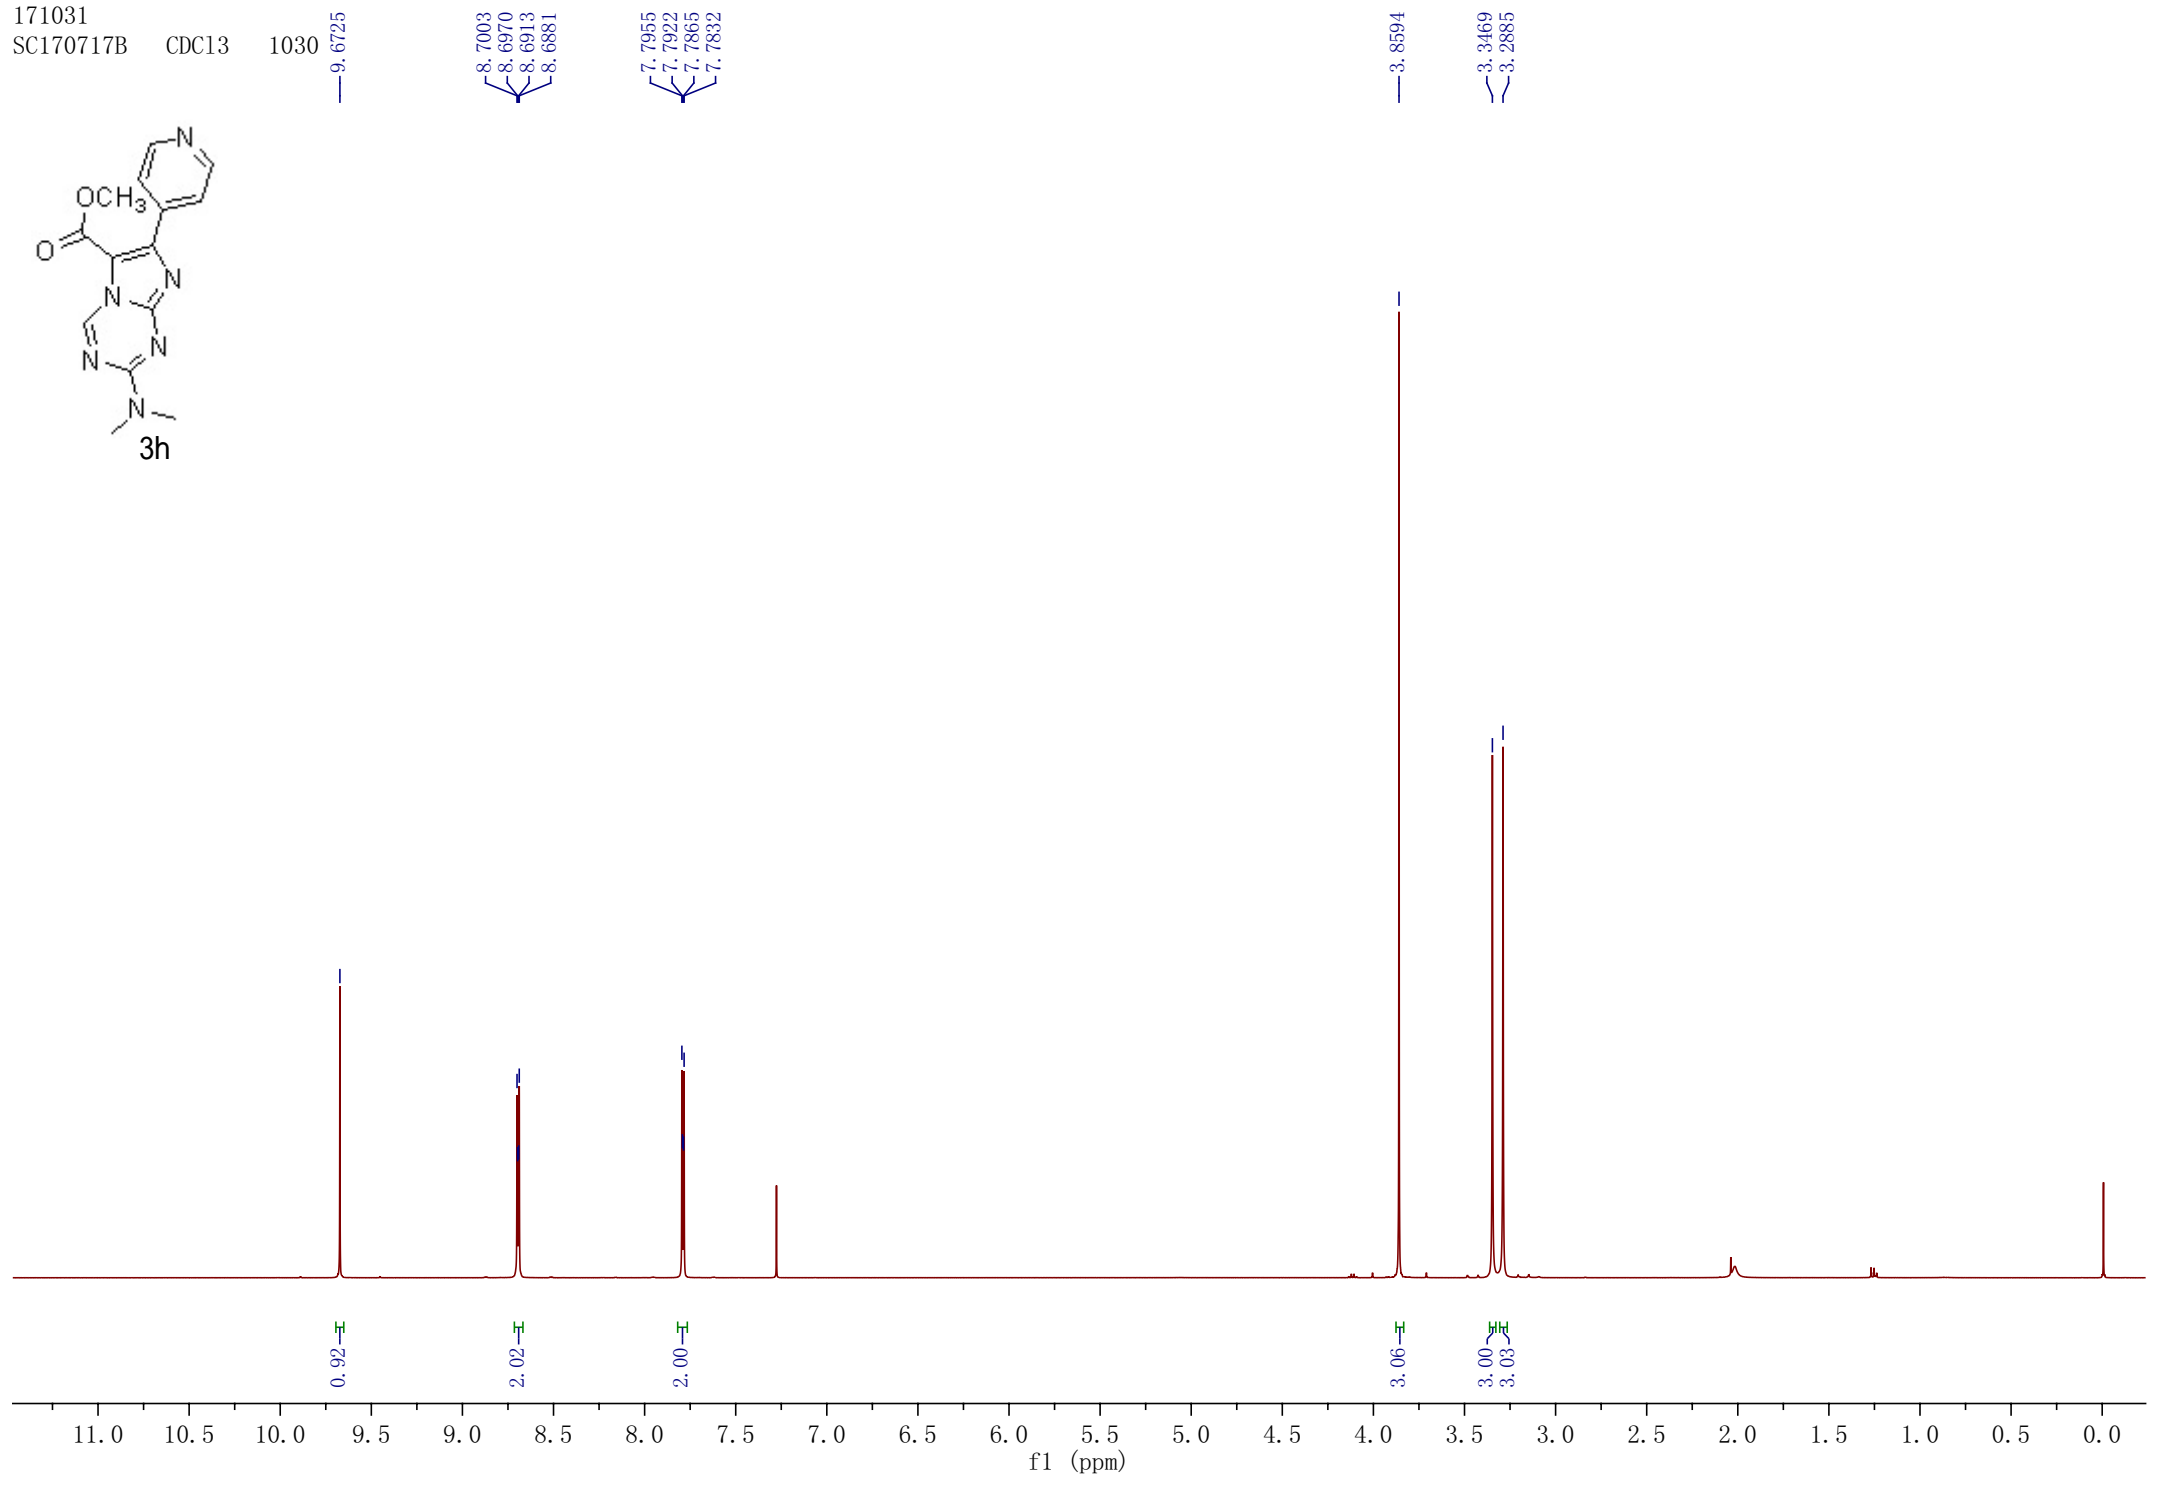

171101  
SC170717B CDC13 1101

160.0760  
158.6706

152.7655  
151.9528  
149.3707  
147.7644

140.8771

124.3656

108.8046

77.2868  
77.0325  
76.7785

51.6332

37.4726  
37.1982

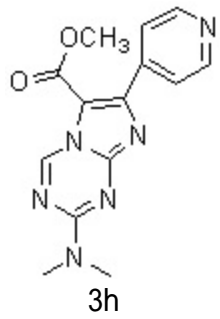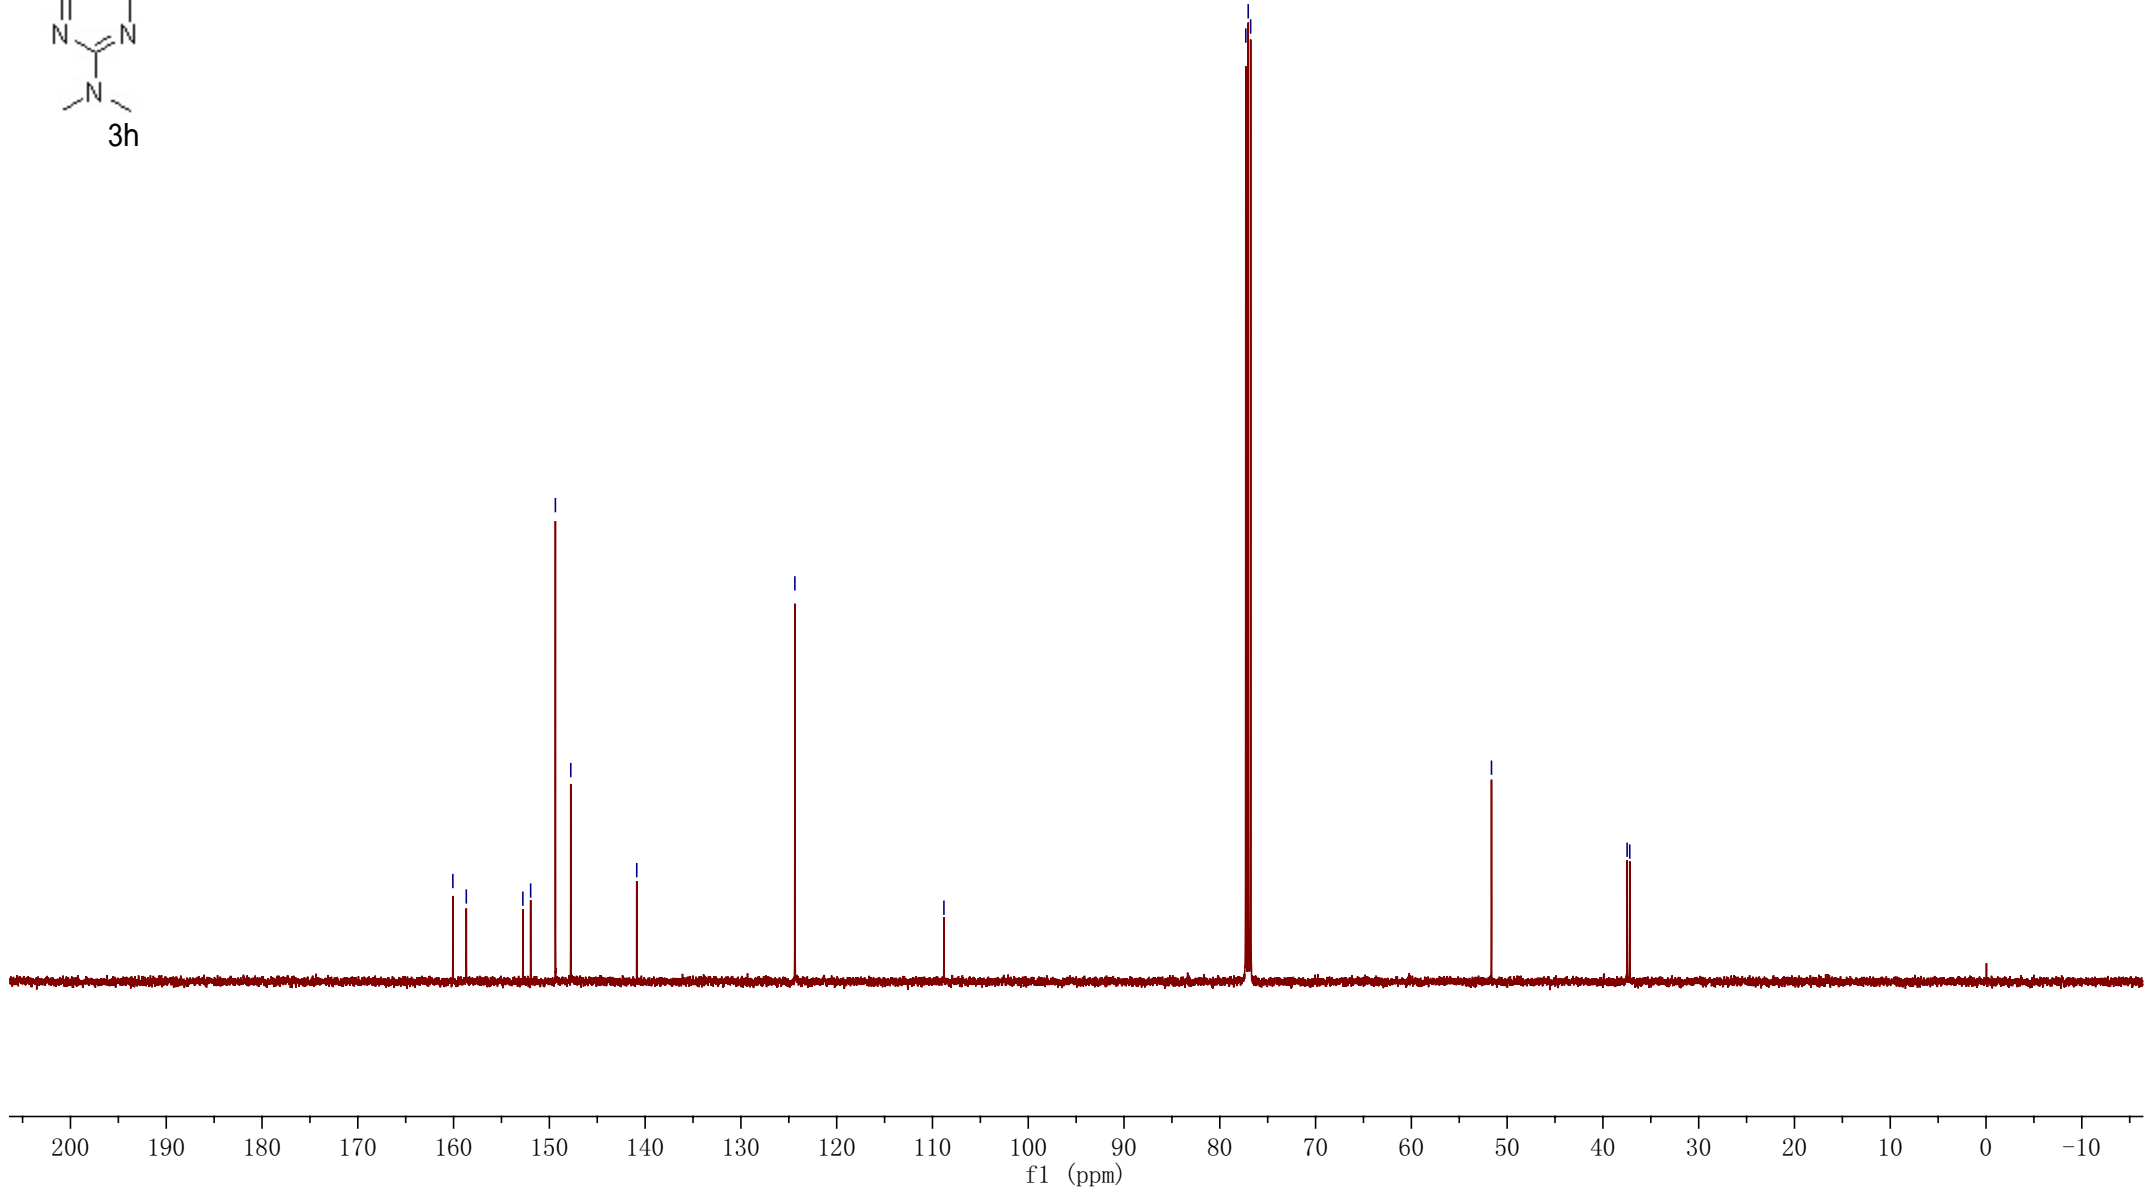

170619  
SC170612B CDC13 0619

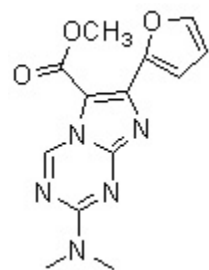

3i

9.5909

7.6204  
7.6183  
7.4891  
7.4883  
7.4822  
7.4815

6.5612  
6.5578  
6.5542  
6.5508

3.9717

3.3073  
3.2580

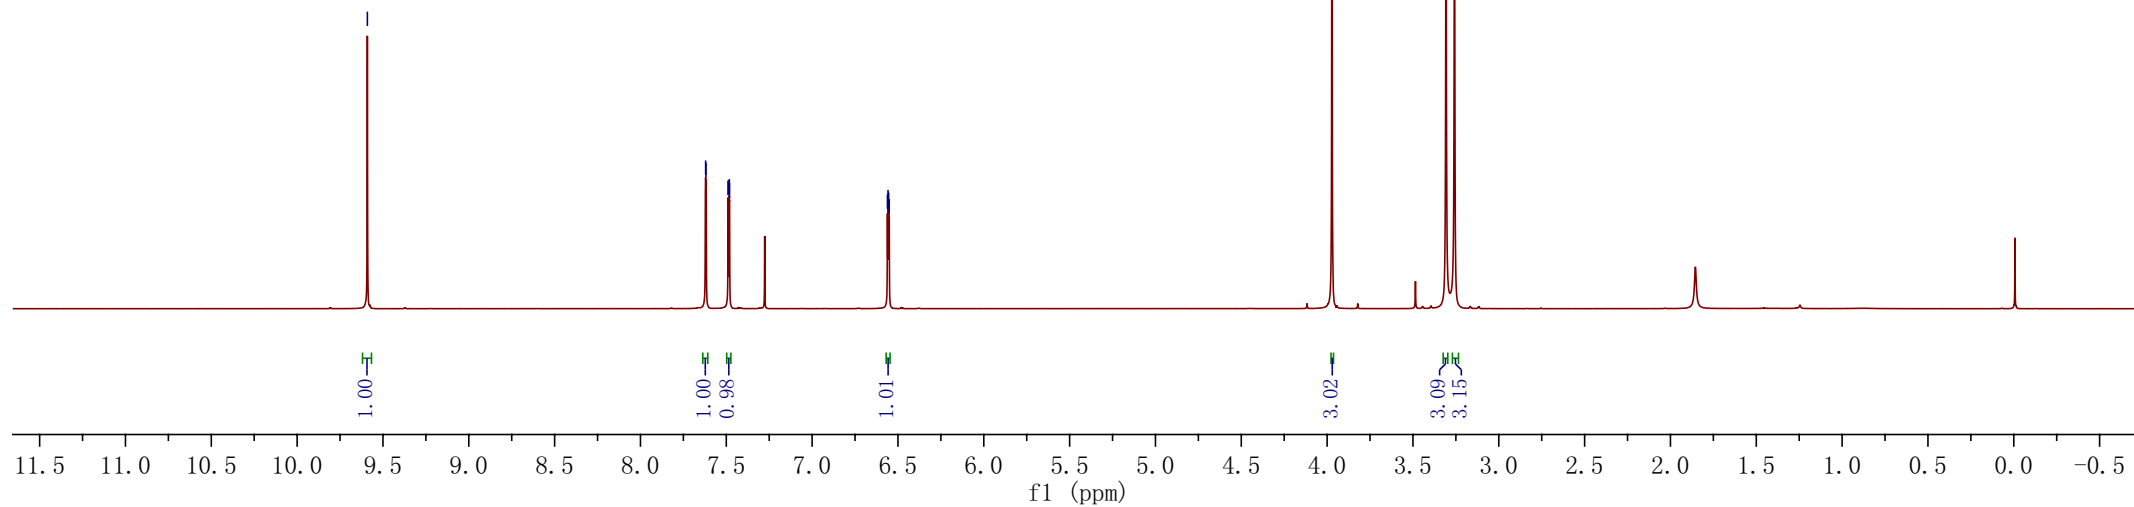

170620  
SC170612B CDC13 0620

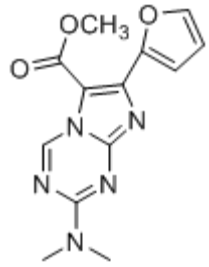

3i

160.05  
158.73

152.69

147.68  
147.18  
144.41

115.40

111.85

106.37

77.29  
77.03  
76.78

51.54

37.31  
37.06

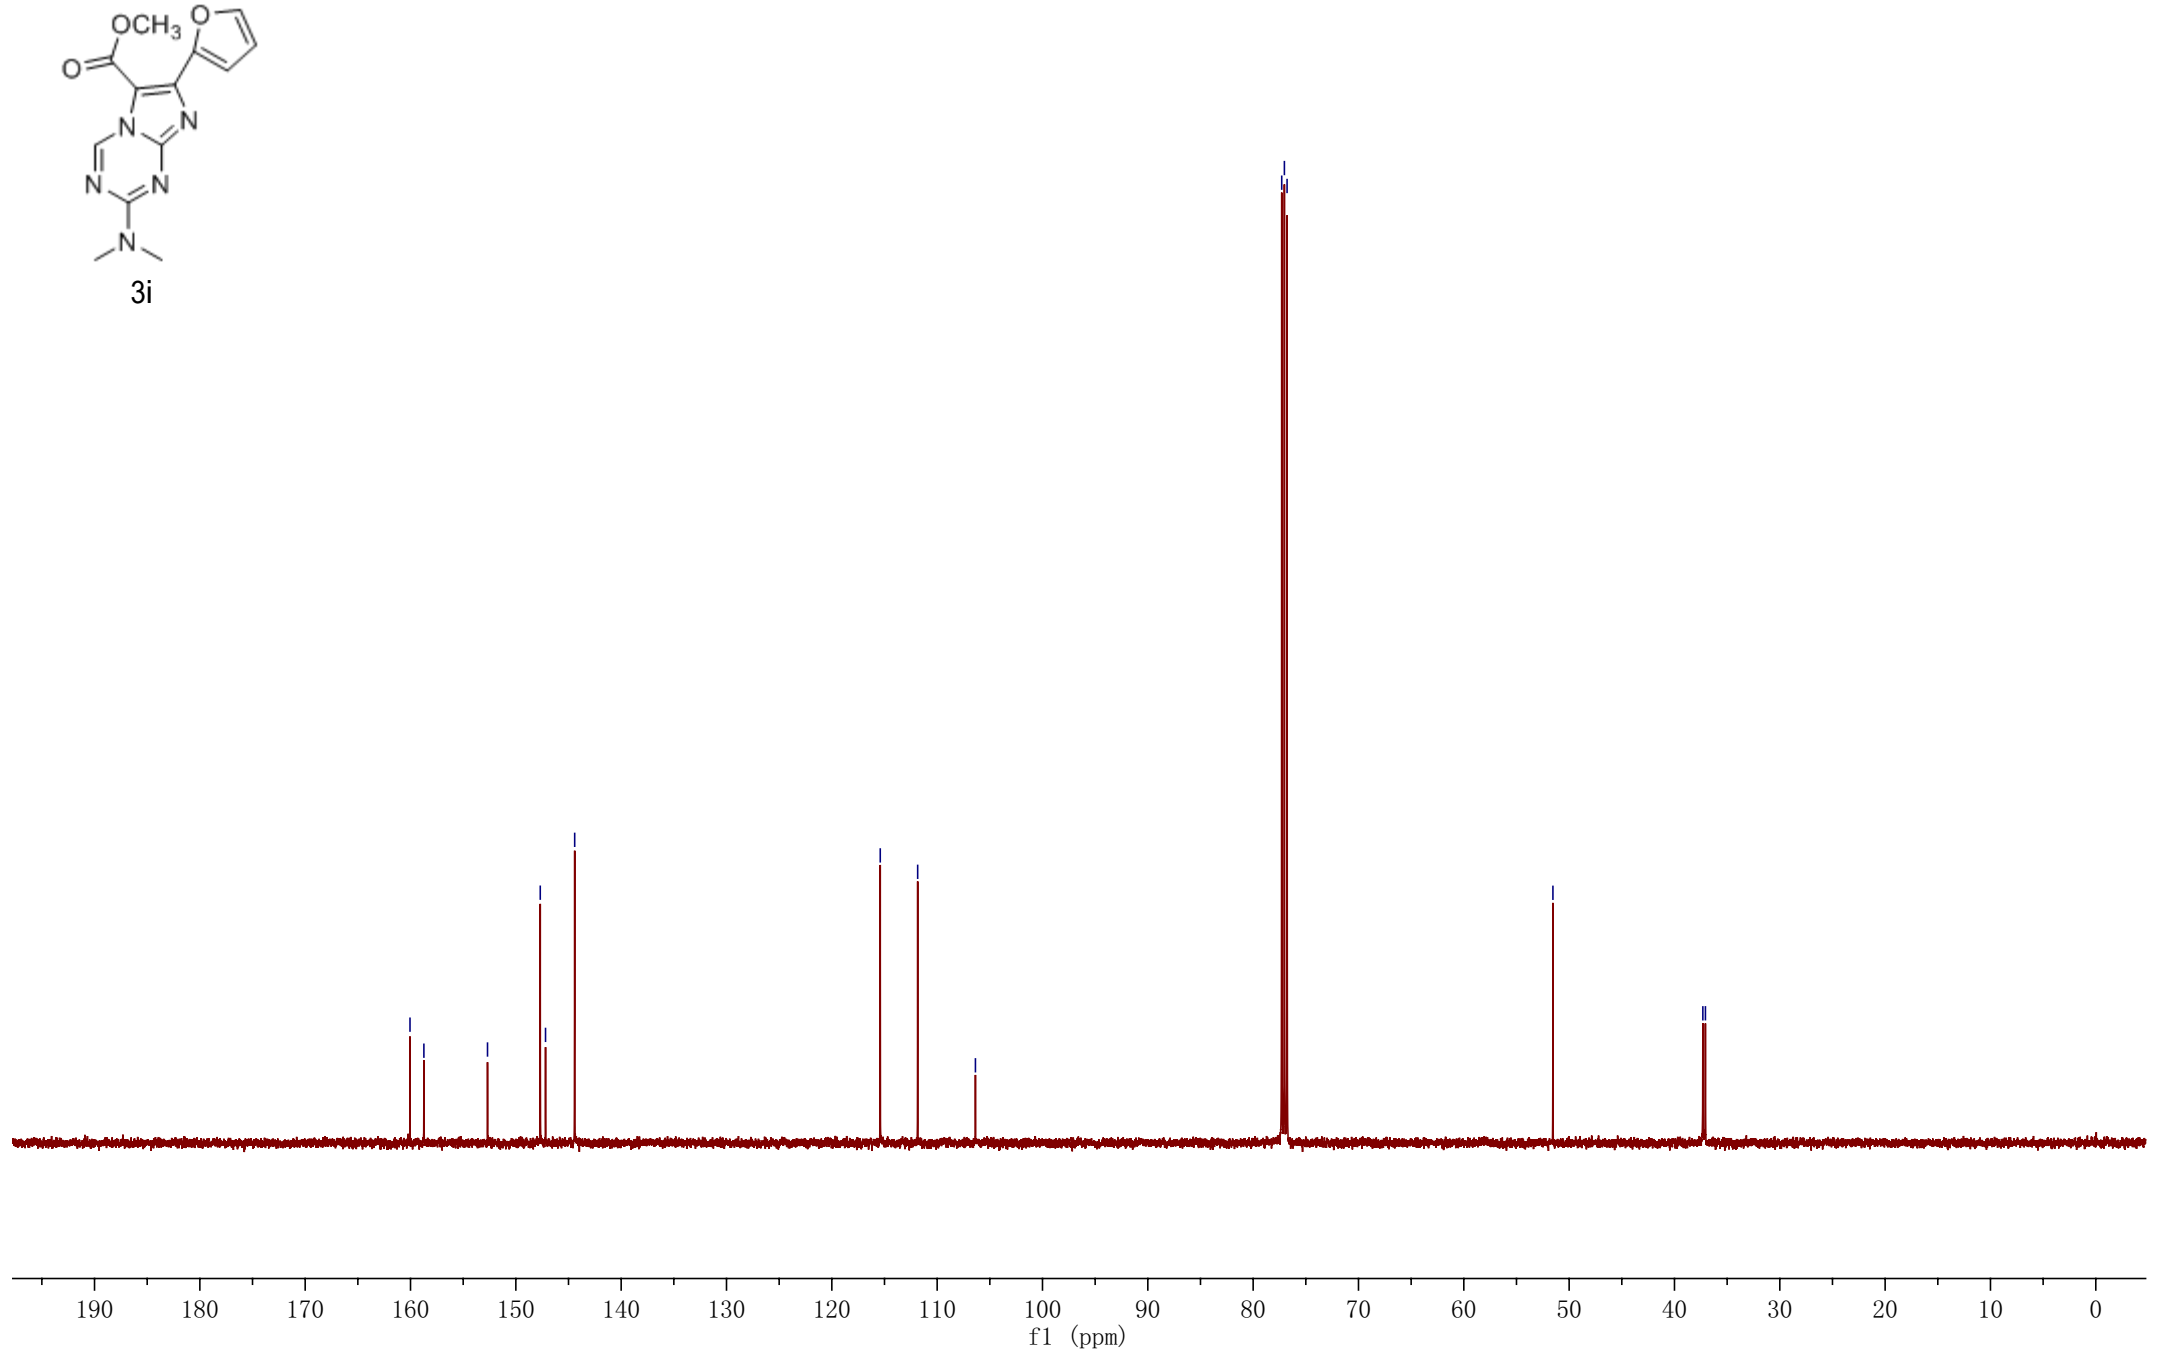

170913  
SC170623 CDC13 0913

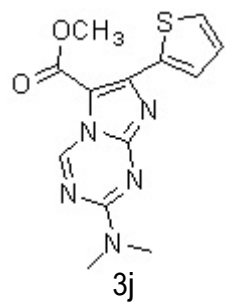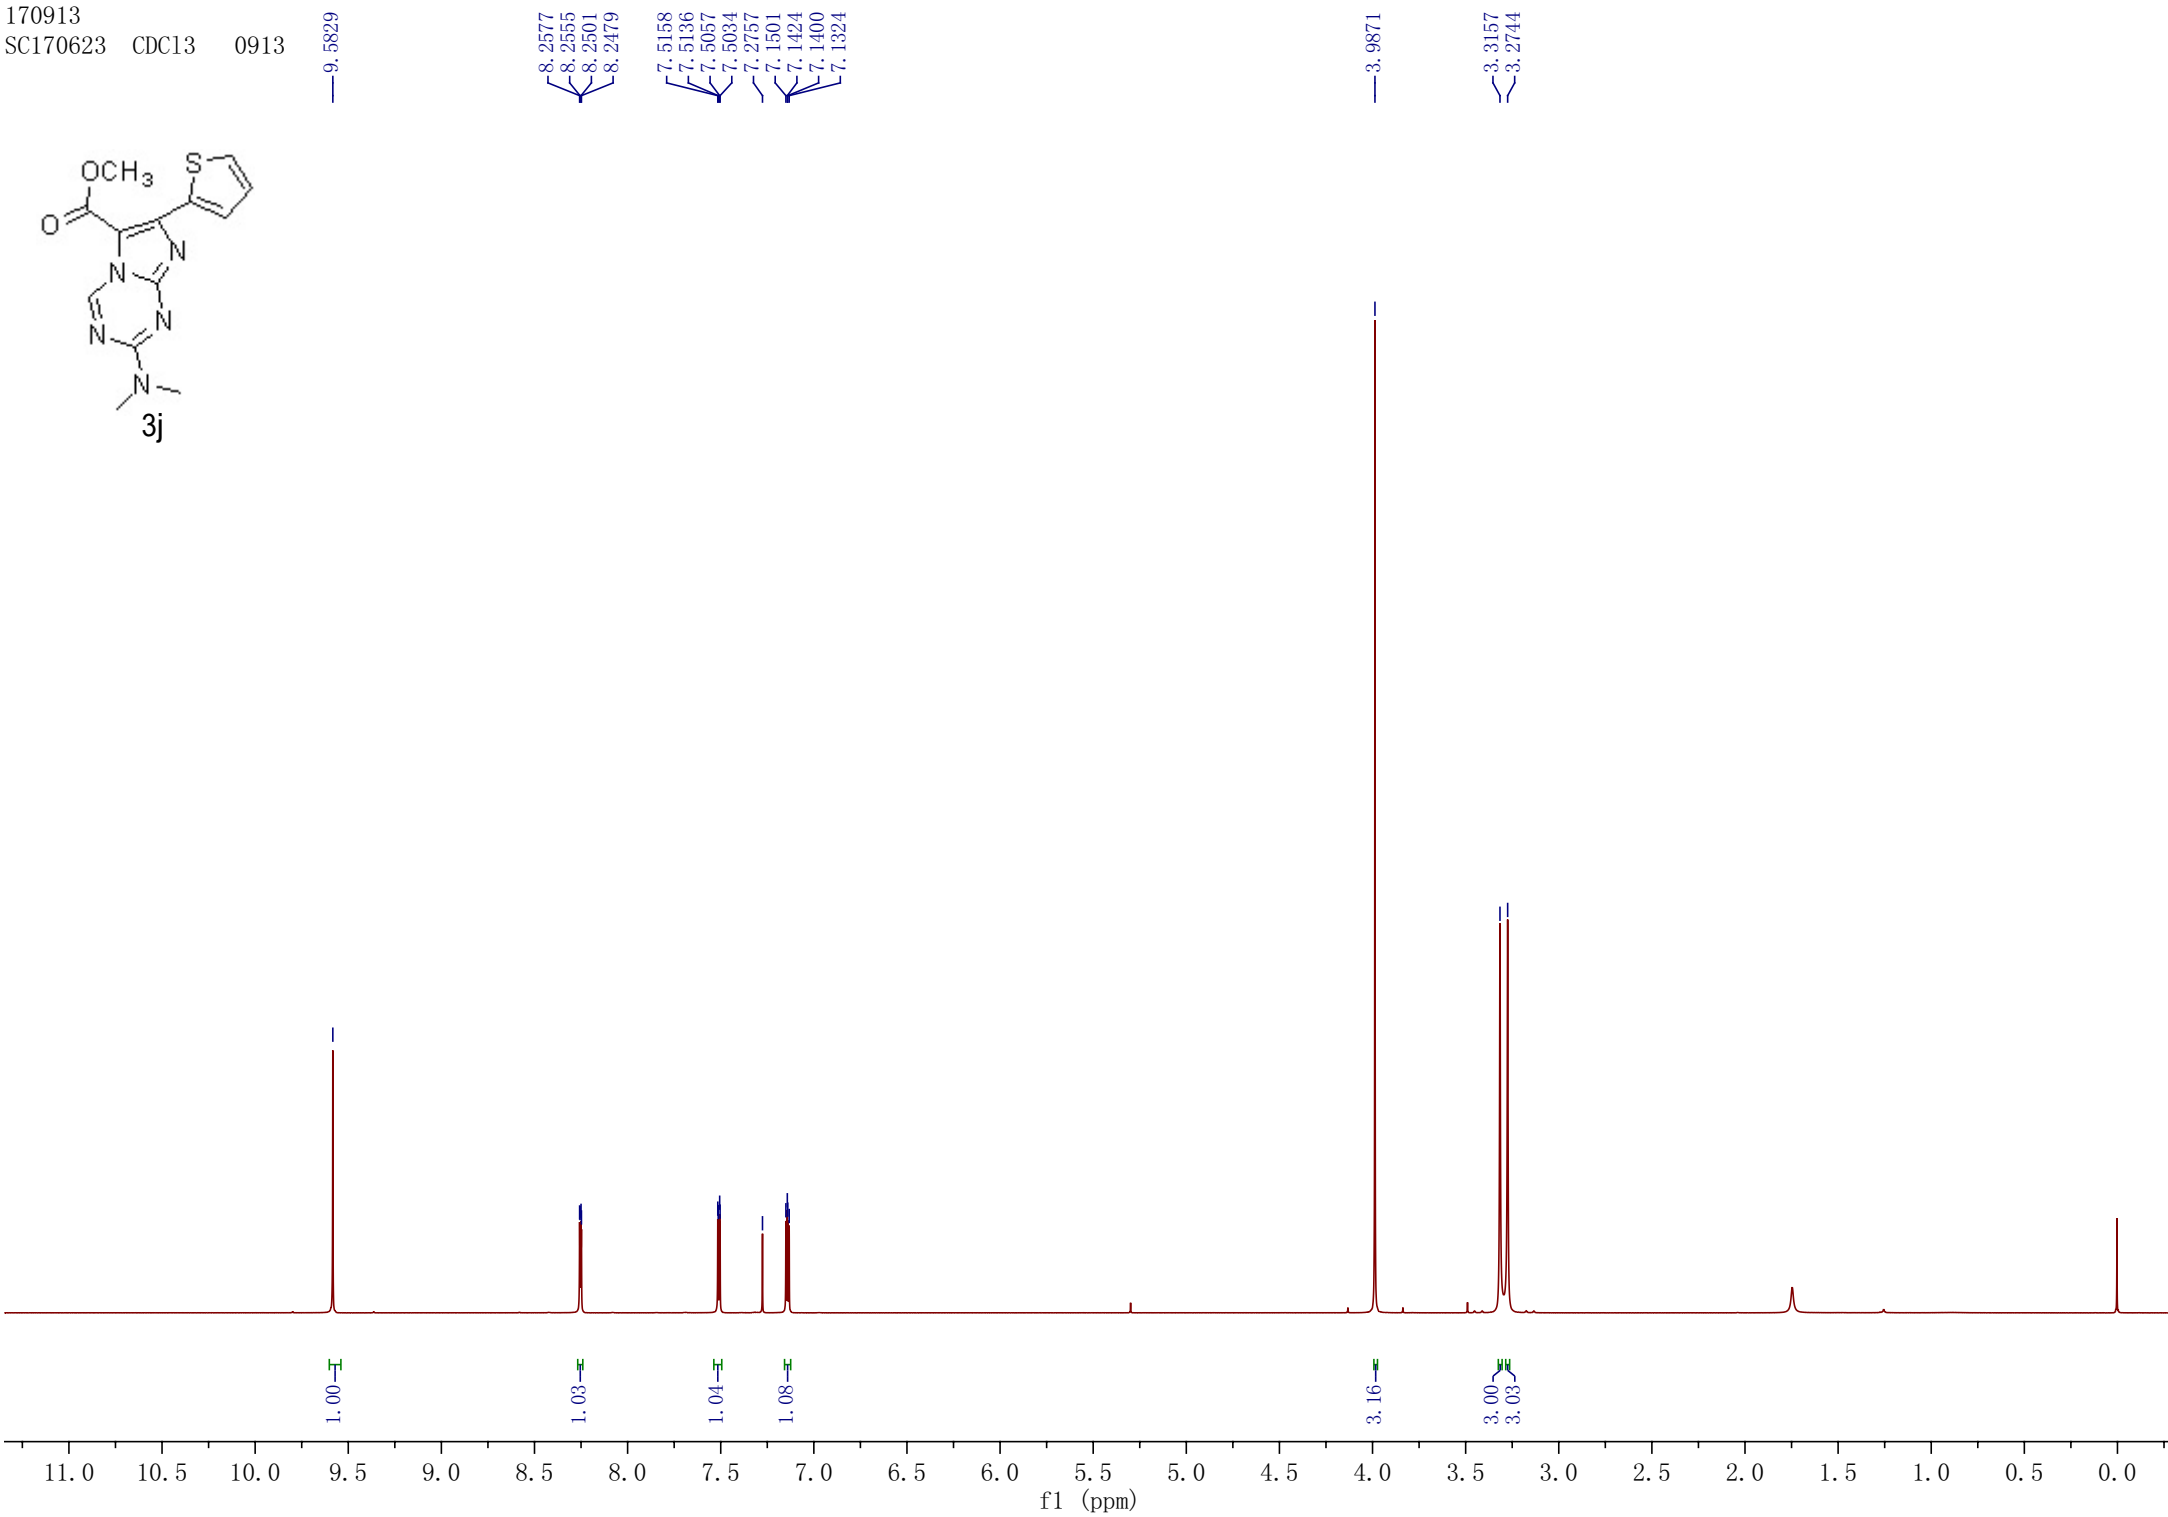

170918  
SC170623 CDC13 0918

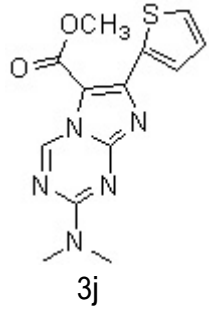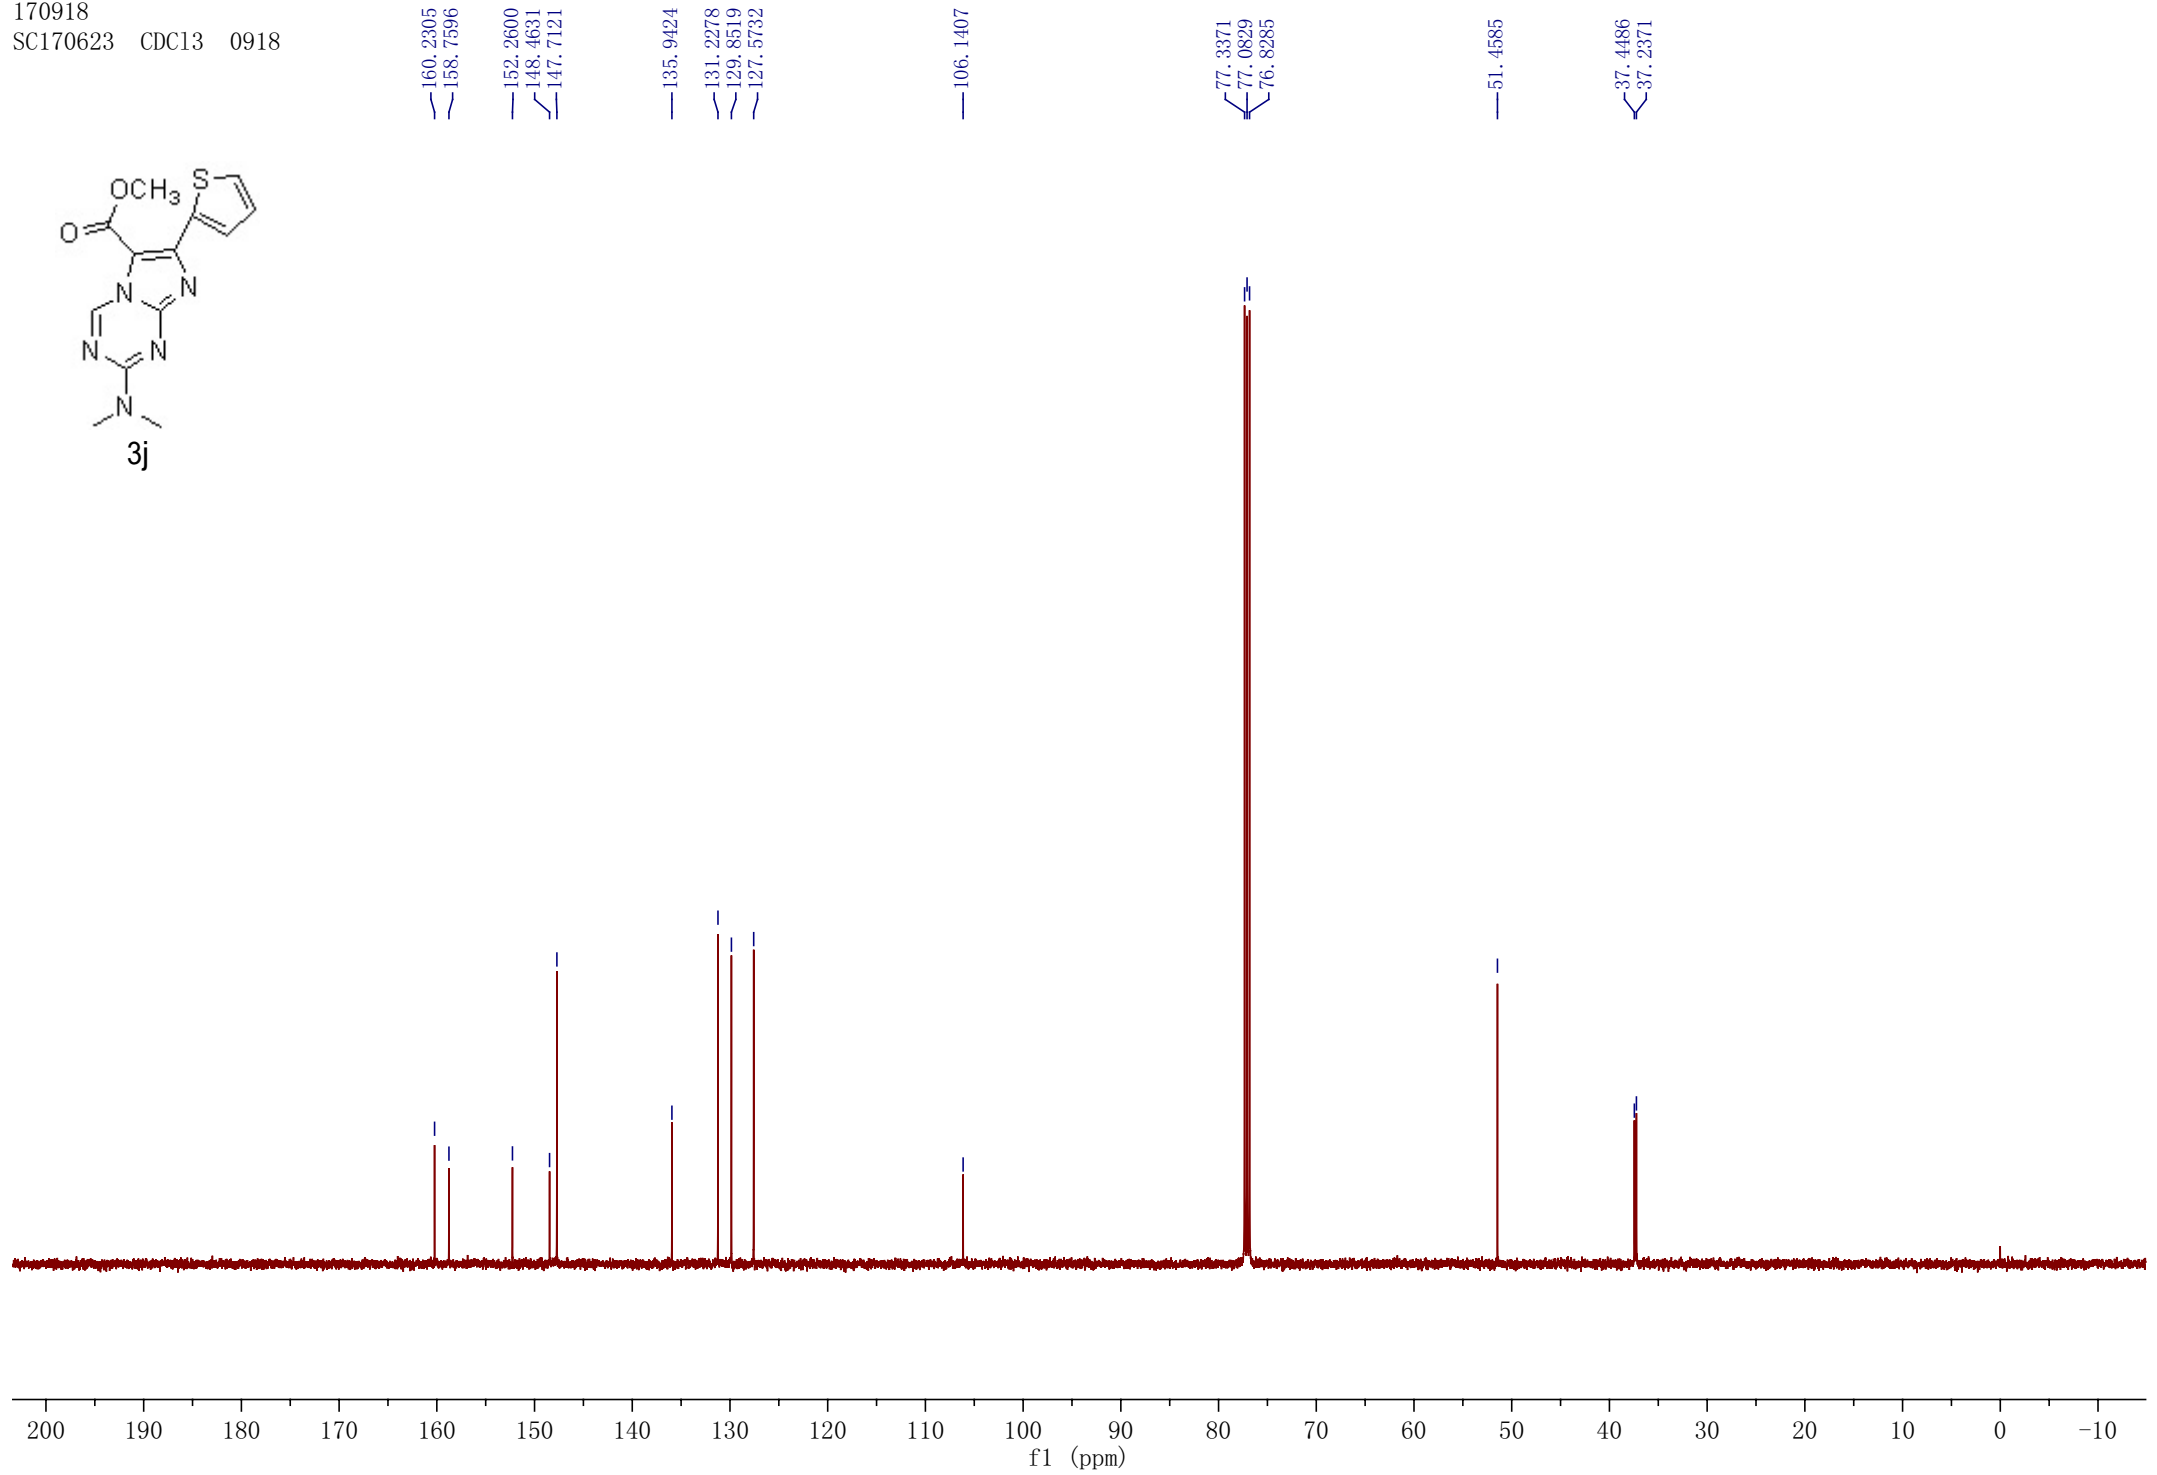

161010  
LJJ161008-134-P CDC13 1010

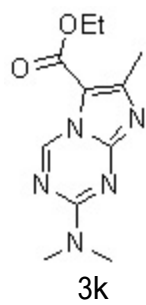

9.5299

4.4045  
4.3903  
4.3760  
4.3618

3.3032  
3.2479

2.5993

1.4270  
1.4128  
1.3985

0.91

2.02

3.00  
2.98

3.00

3.10

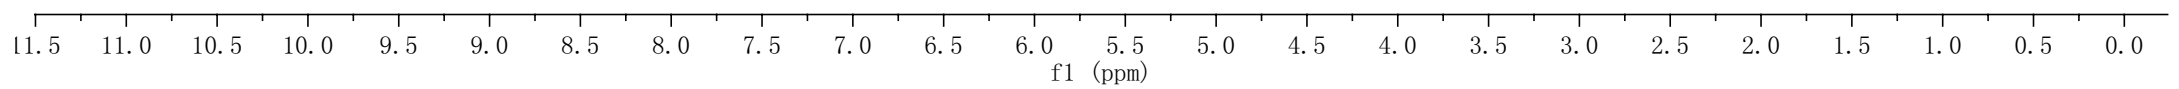



171031  
SC170719 CDC13 1031

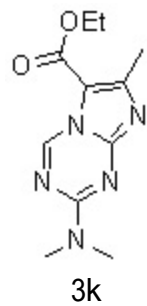

160.6411  
158.6090  
155.4058  
152.6084  
147.0407

108.7652

77.2851  
77.0307  
76.7766

60.3745

37.3147  
37.0342

16.1408  
14.4432

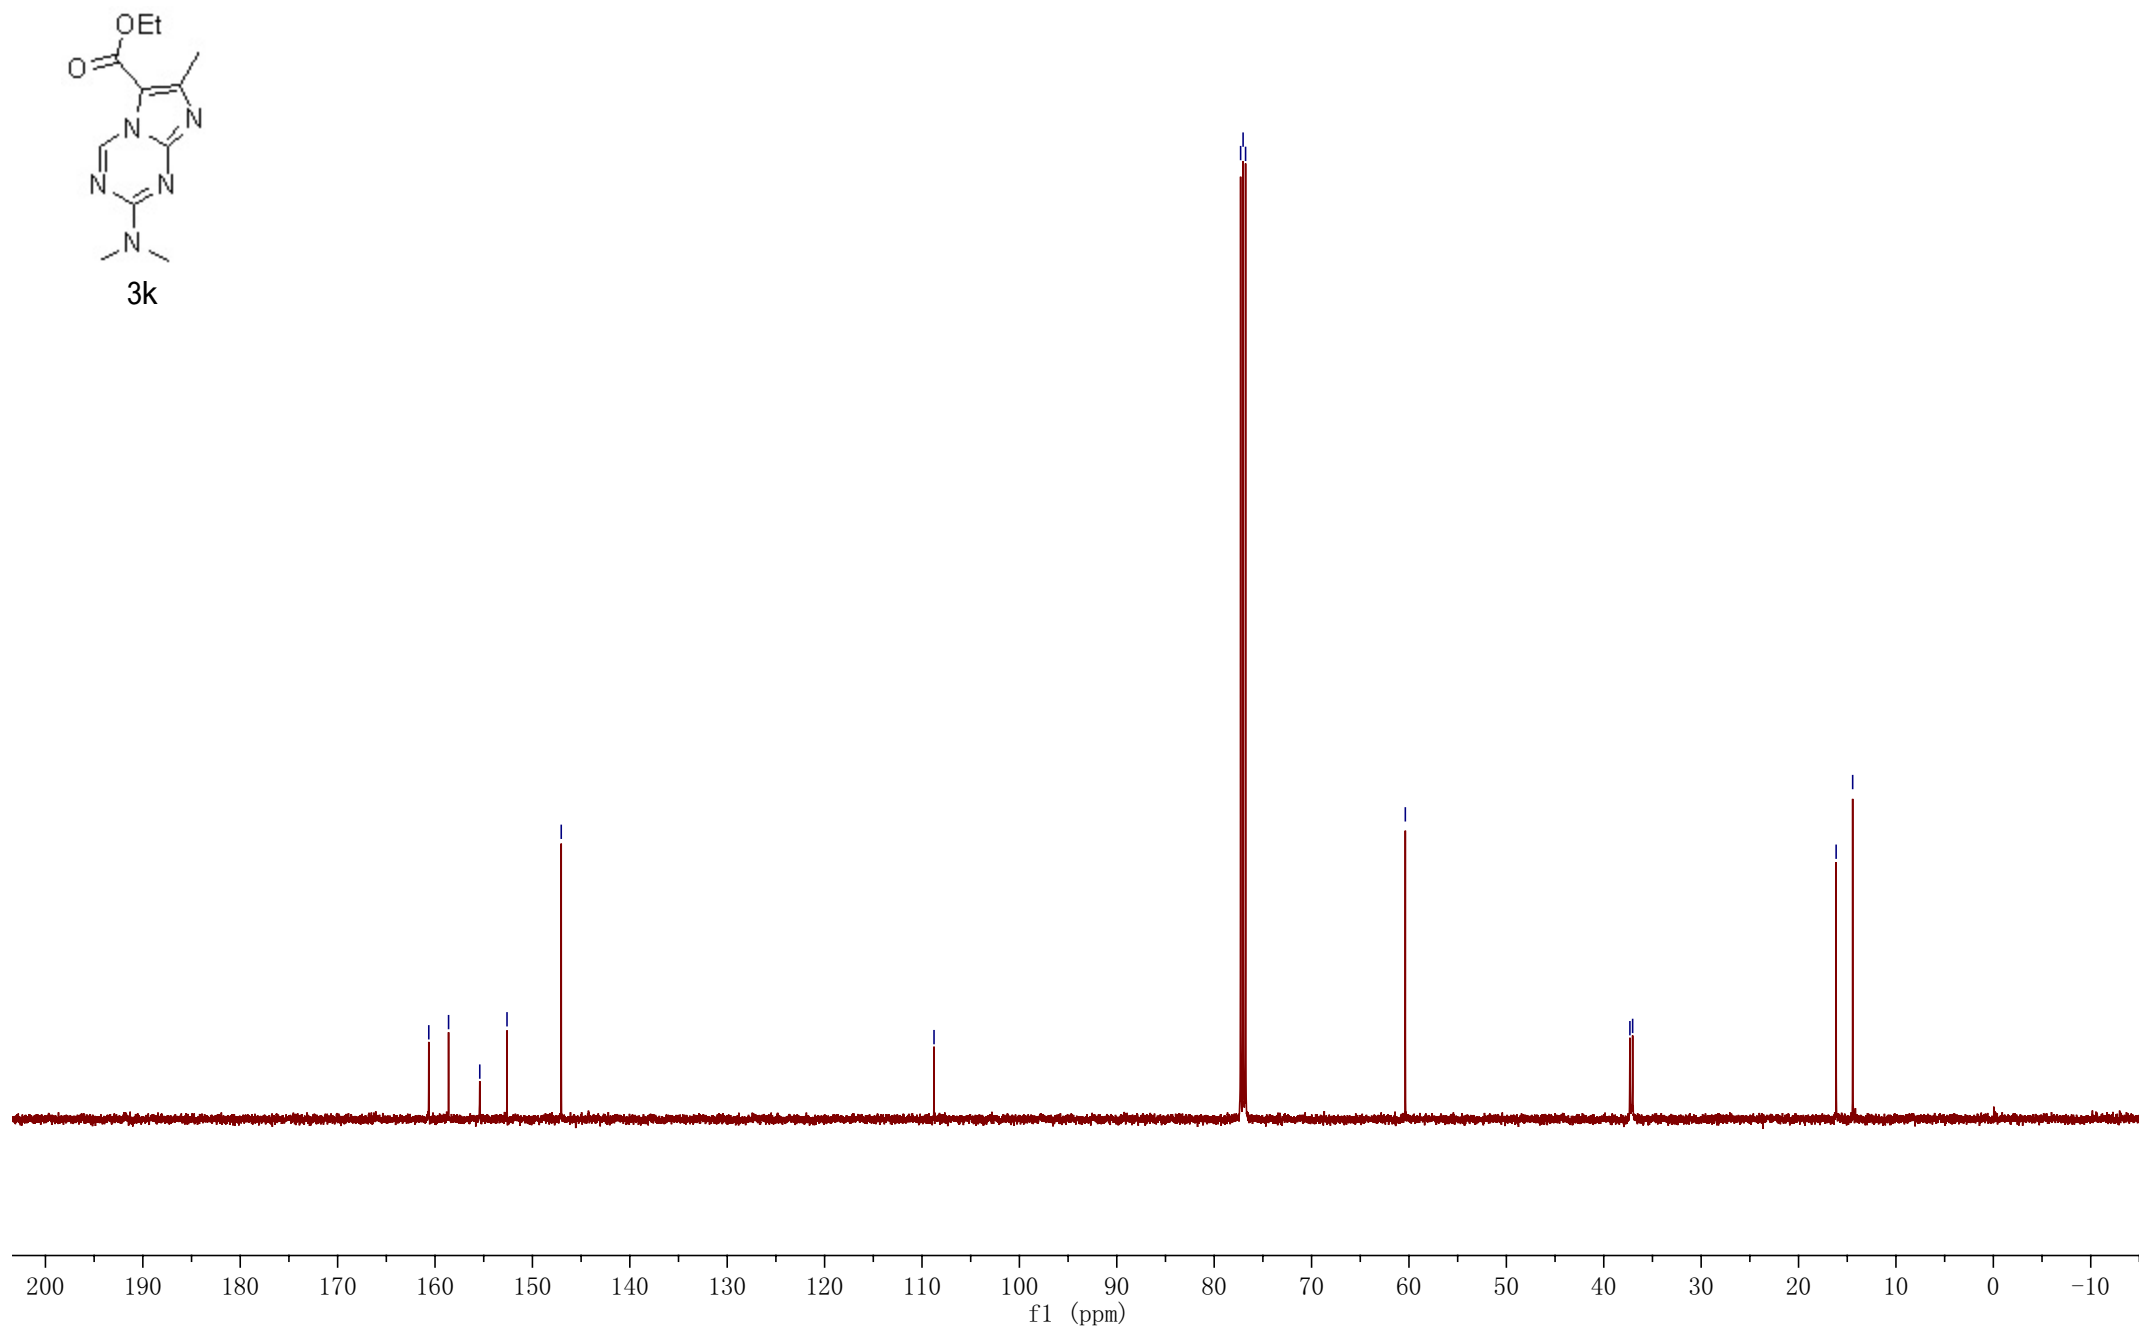

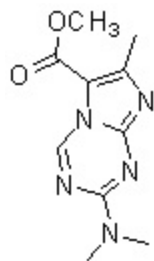

3I

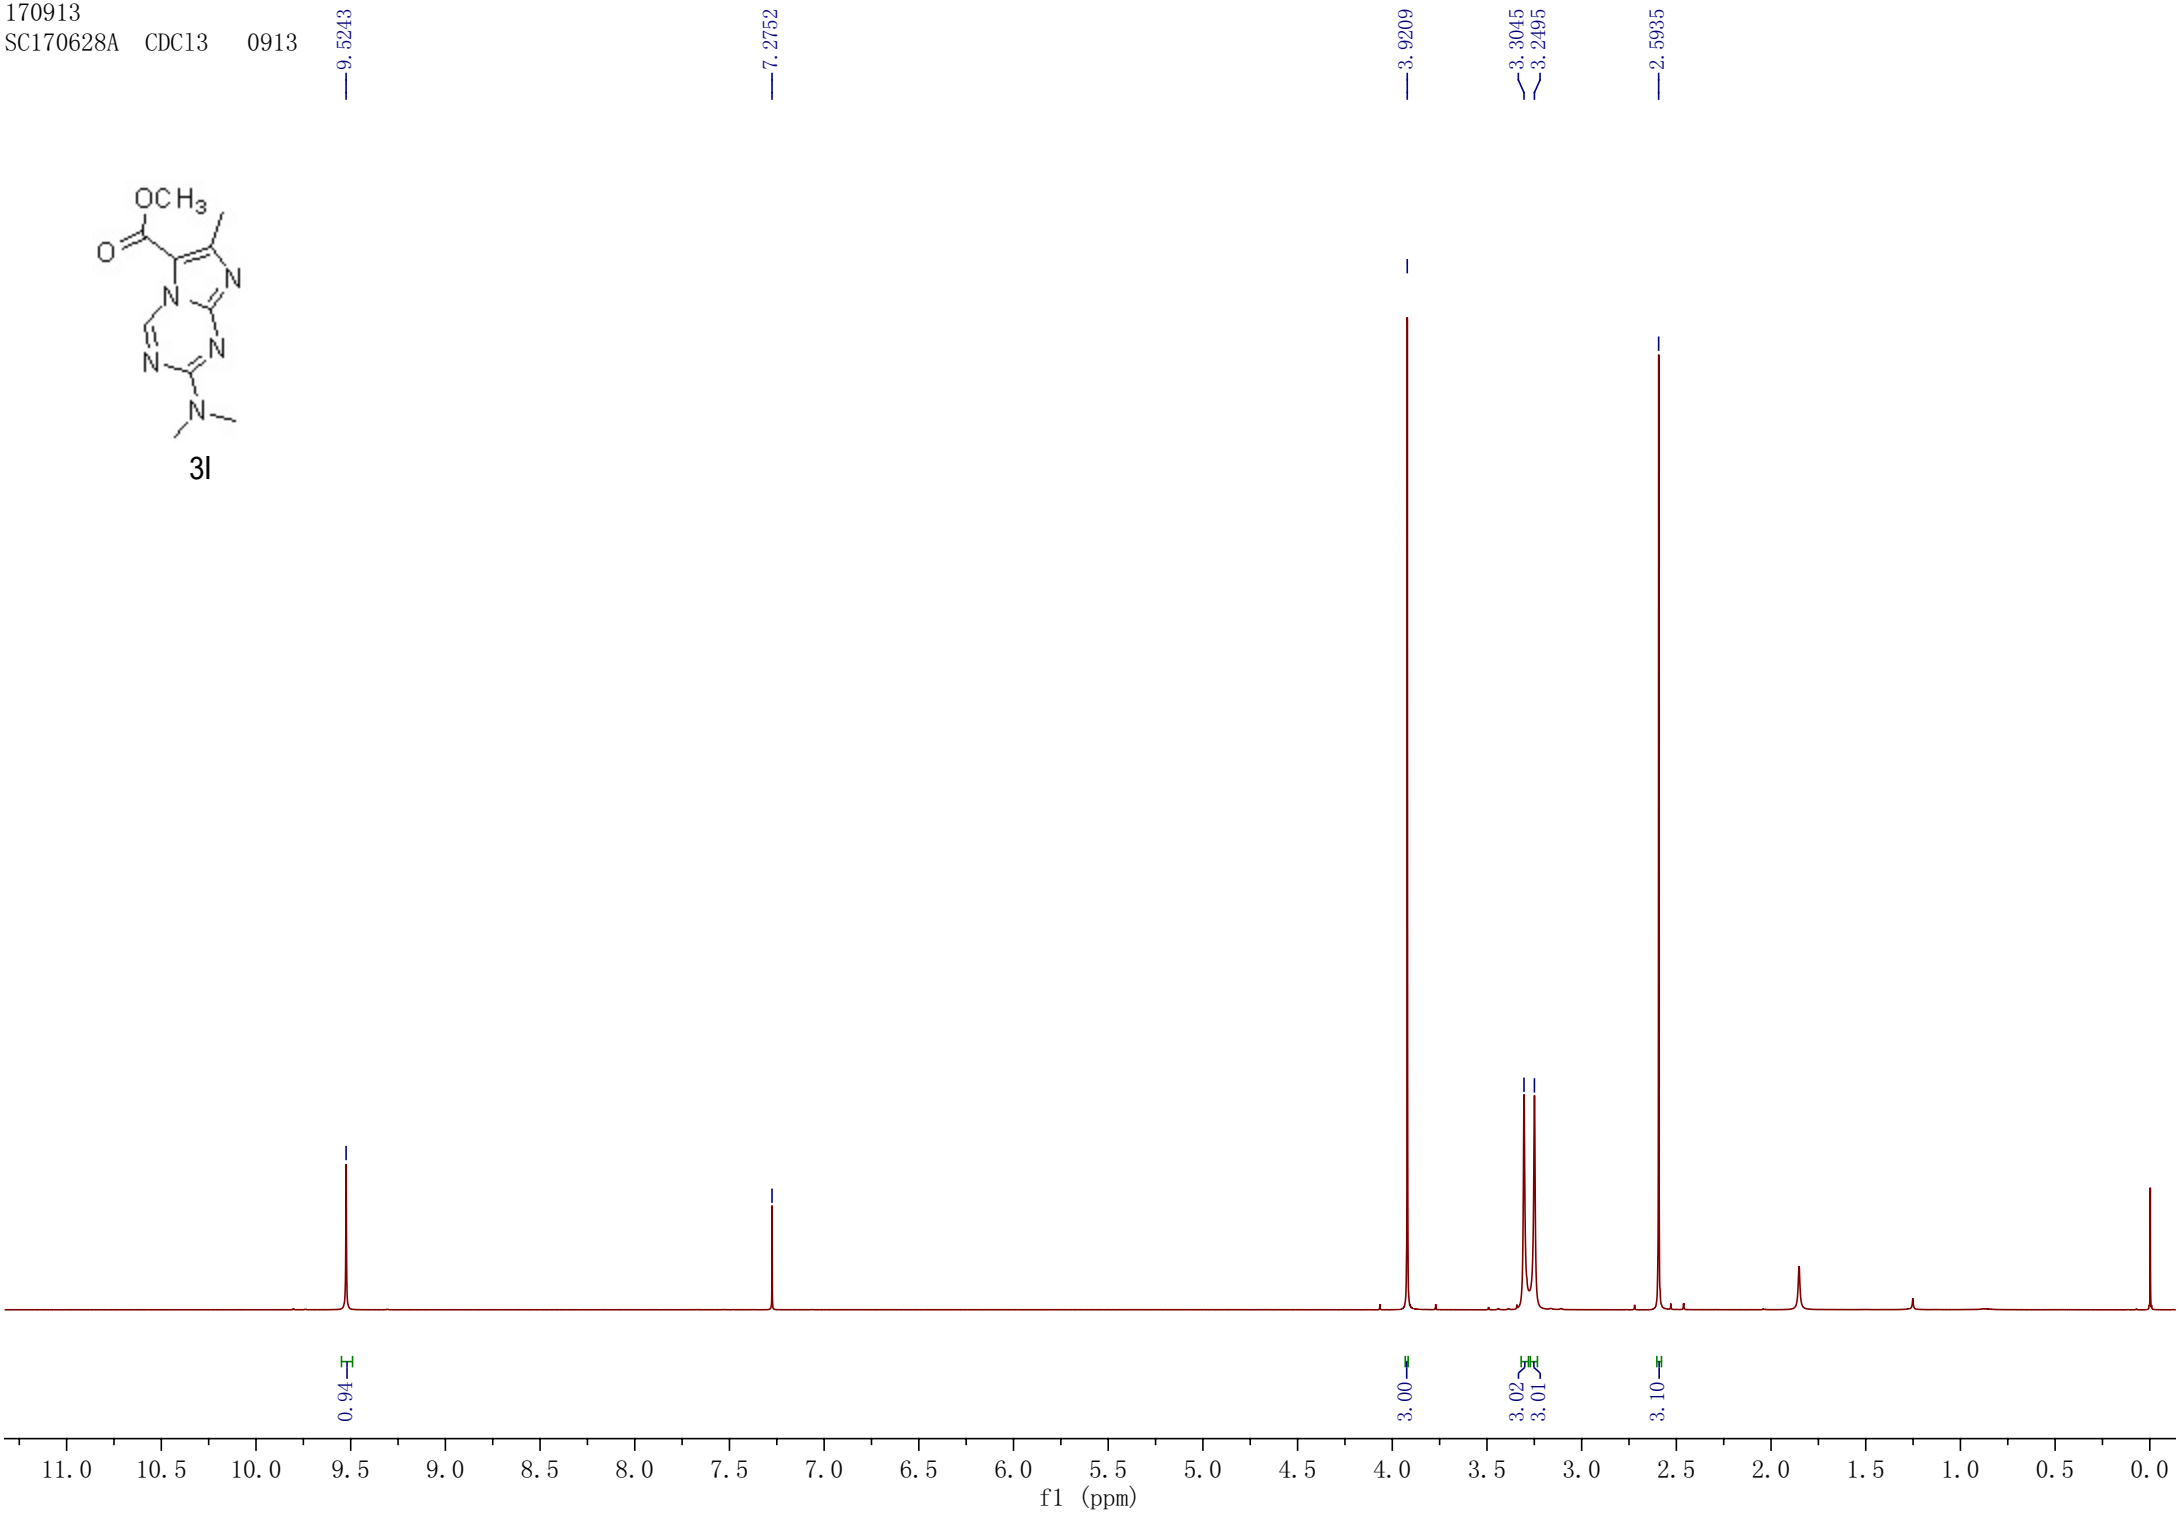

170918  
SC170628A CDC13 0918

161.0714  
158.7098  
155.5935  
152.7786  
147.0704

108.6956

77.3354  
77.0814  
76.8273

51.3998

37.3892  
37.0983

16.1677

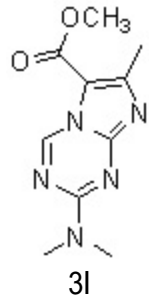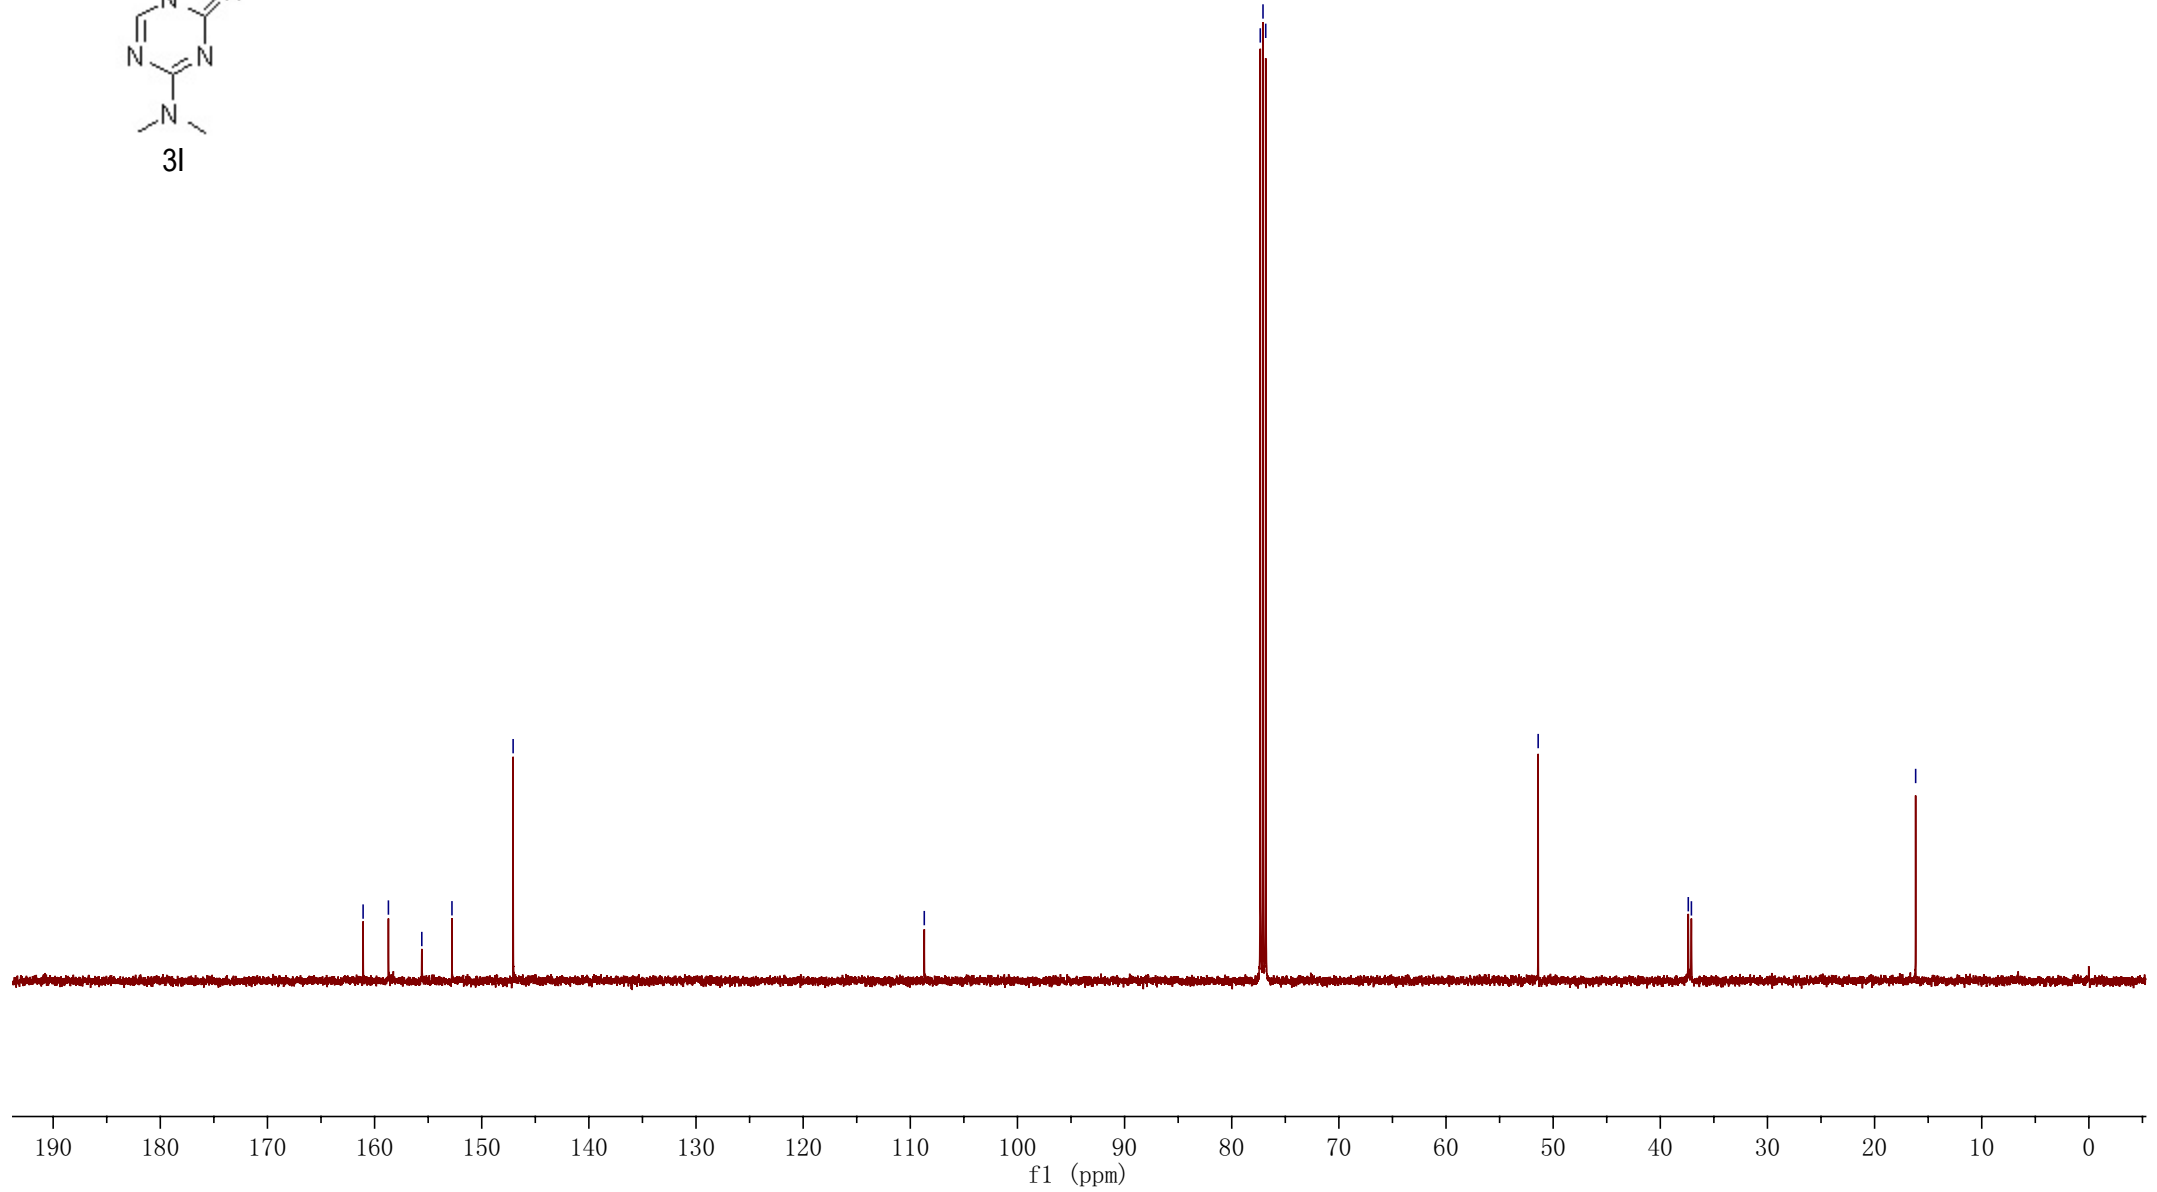

170619  
SC170602A CDC13 0619

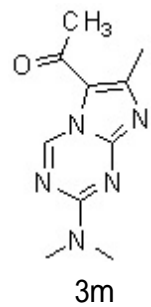

—9.8898

—3.3035  
—3.2477

—2.6559  
—2.5186

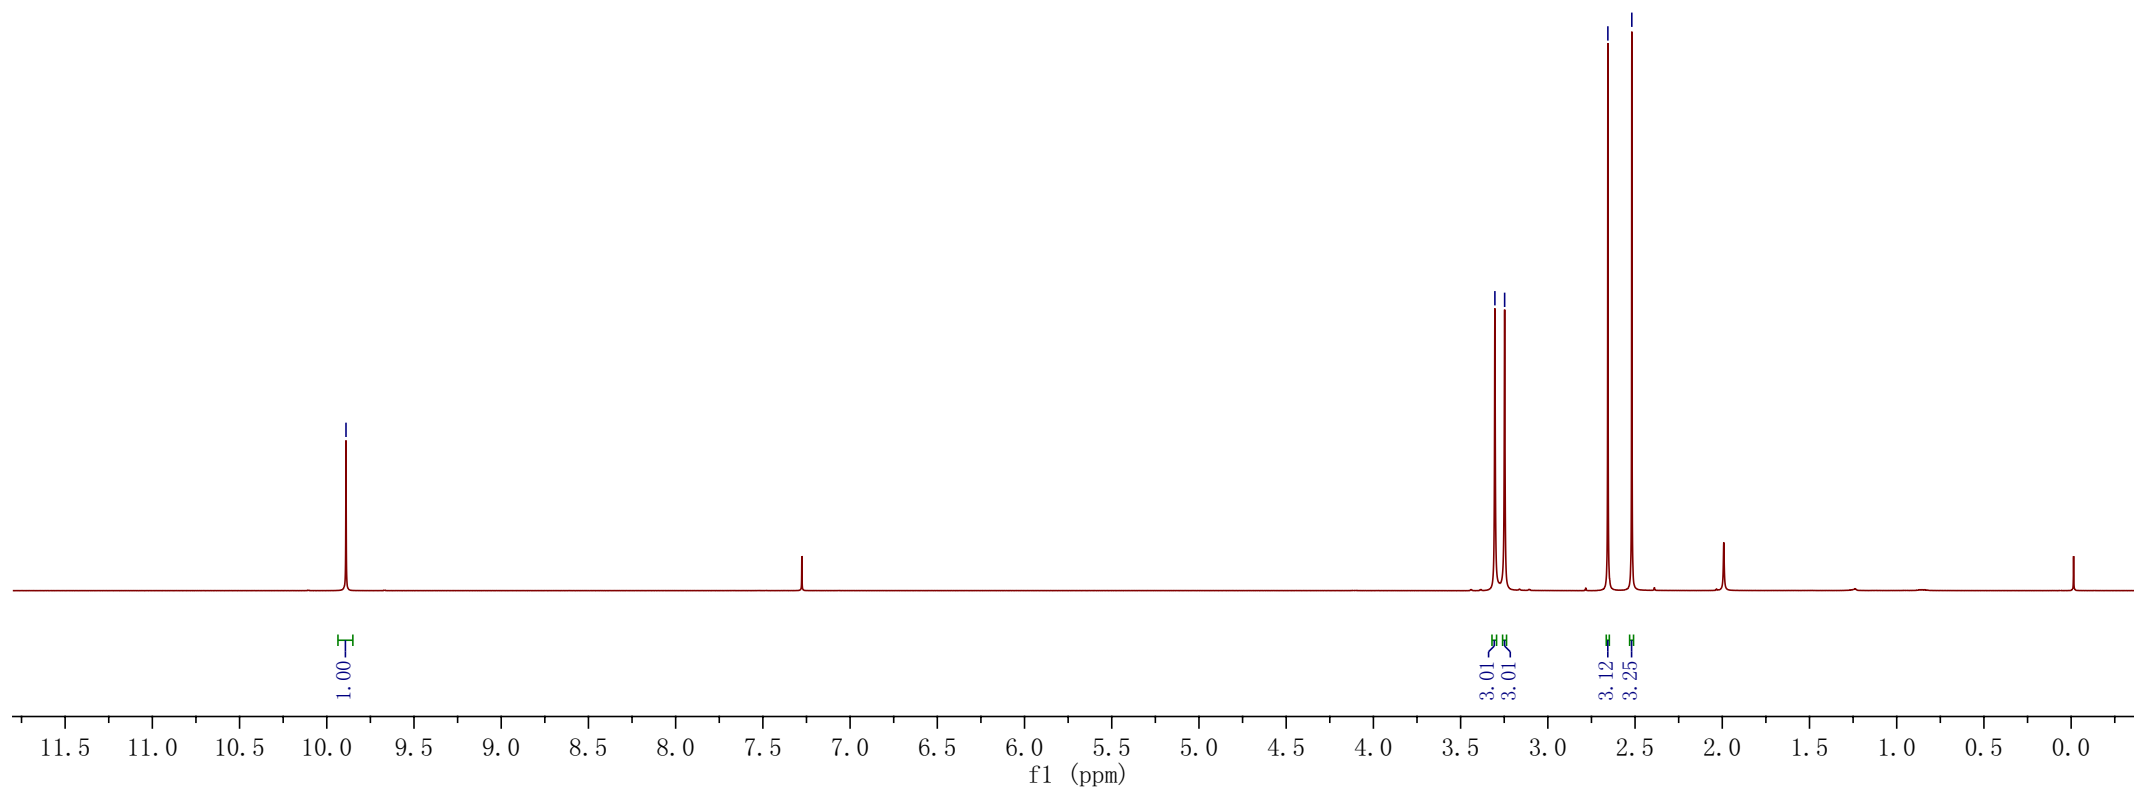

170620  
SC170602A CDC13 0620

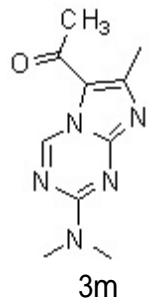

186.2329

159.0091

155.4998

152.8828

148.1384

119.0462

77.2871

77.0330

76.7787

37.3694

37.0250

29.1432

17.7243

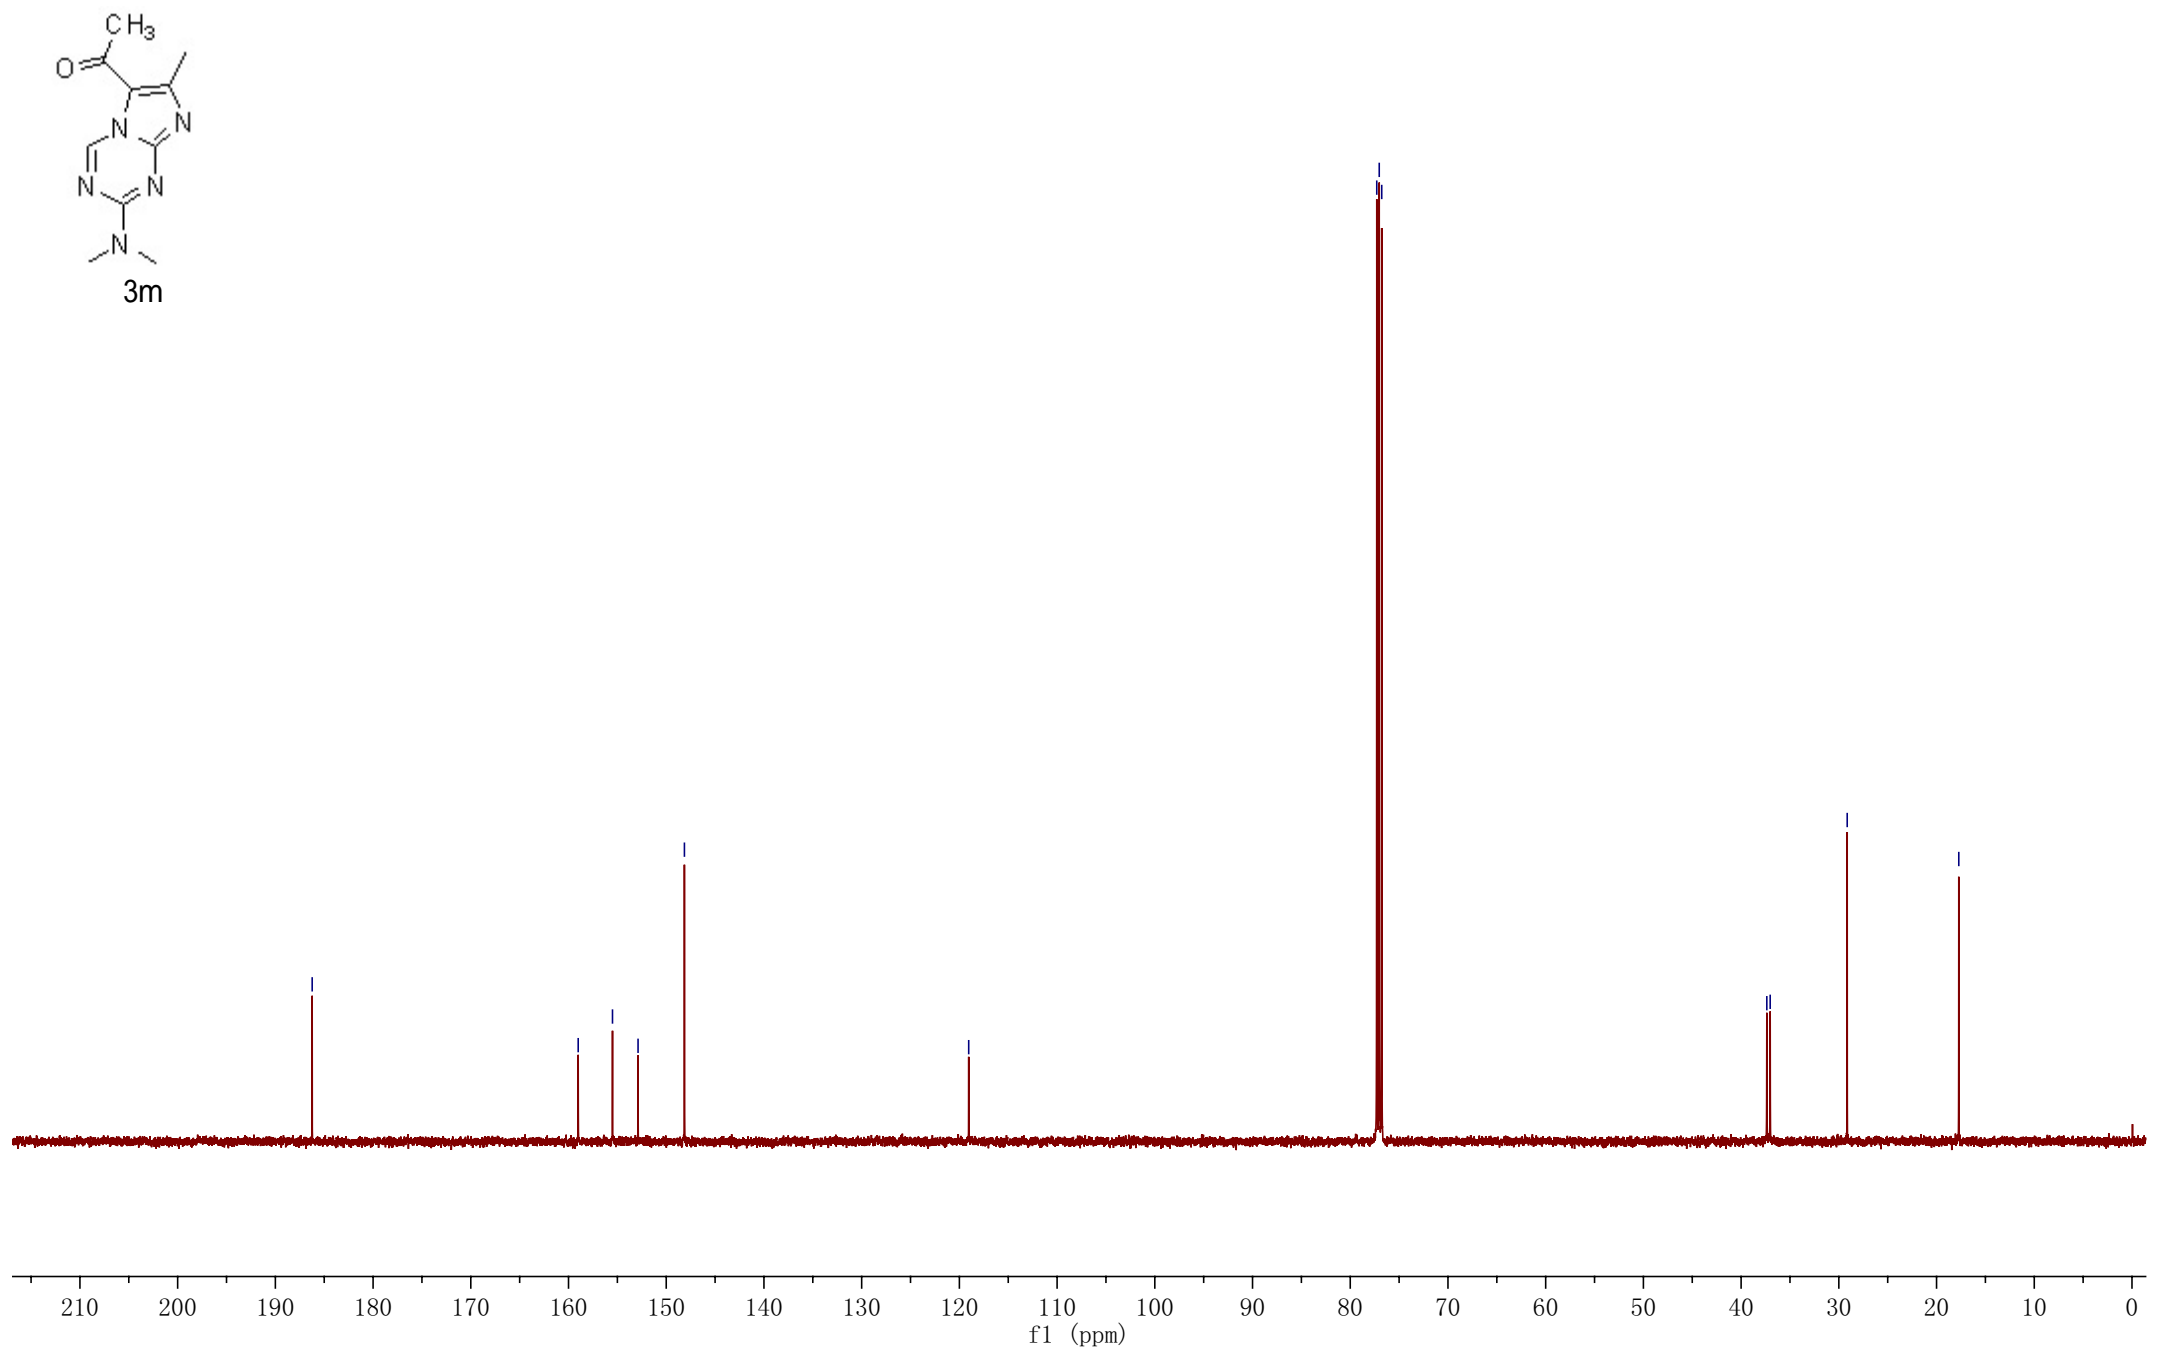

170913  
SC170717A CDCl<sub>3</sub> 0913

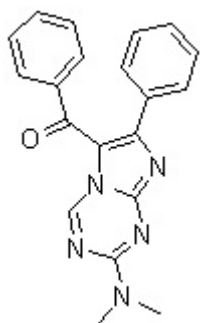

3n

7.4723  
7.4581  
7.4557  
7.3374  
7.3231  
7.3206  
7.2868  
7.2762  
7.2720  
7.2570  
7.1636  
7.1488  
7.1340  
7.1089  
7.0934  
7.0778  
7.0701  
7.0546  
7.0396

3.3794  
3.3294

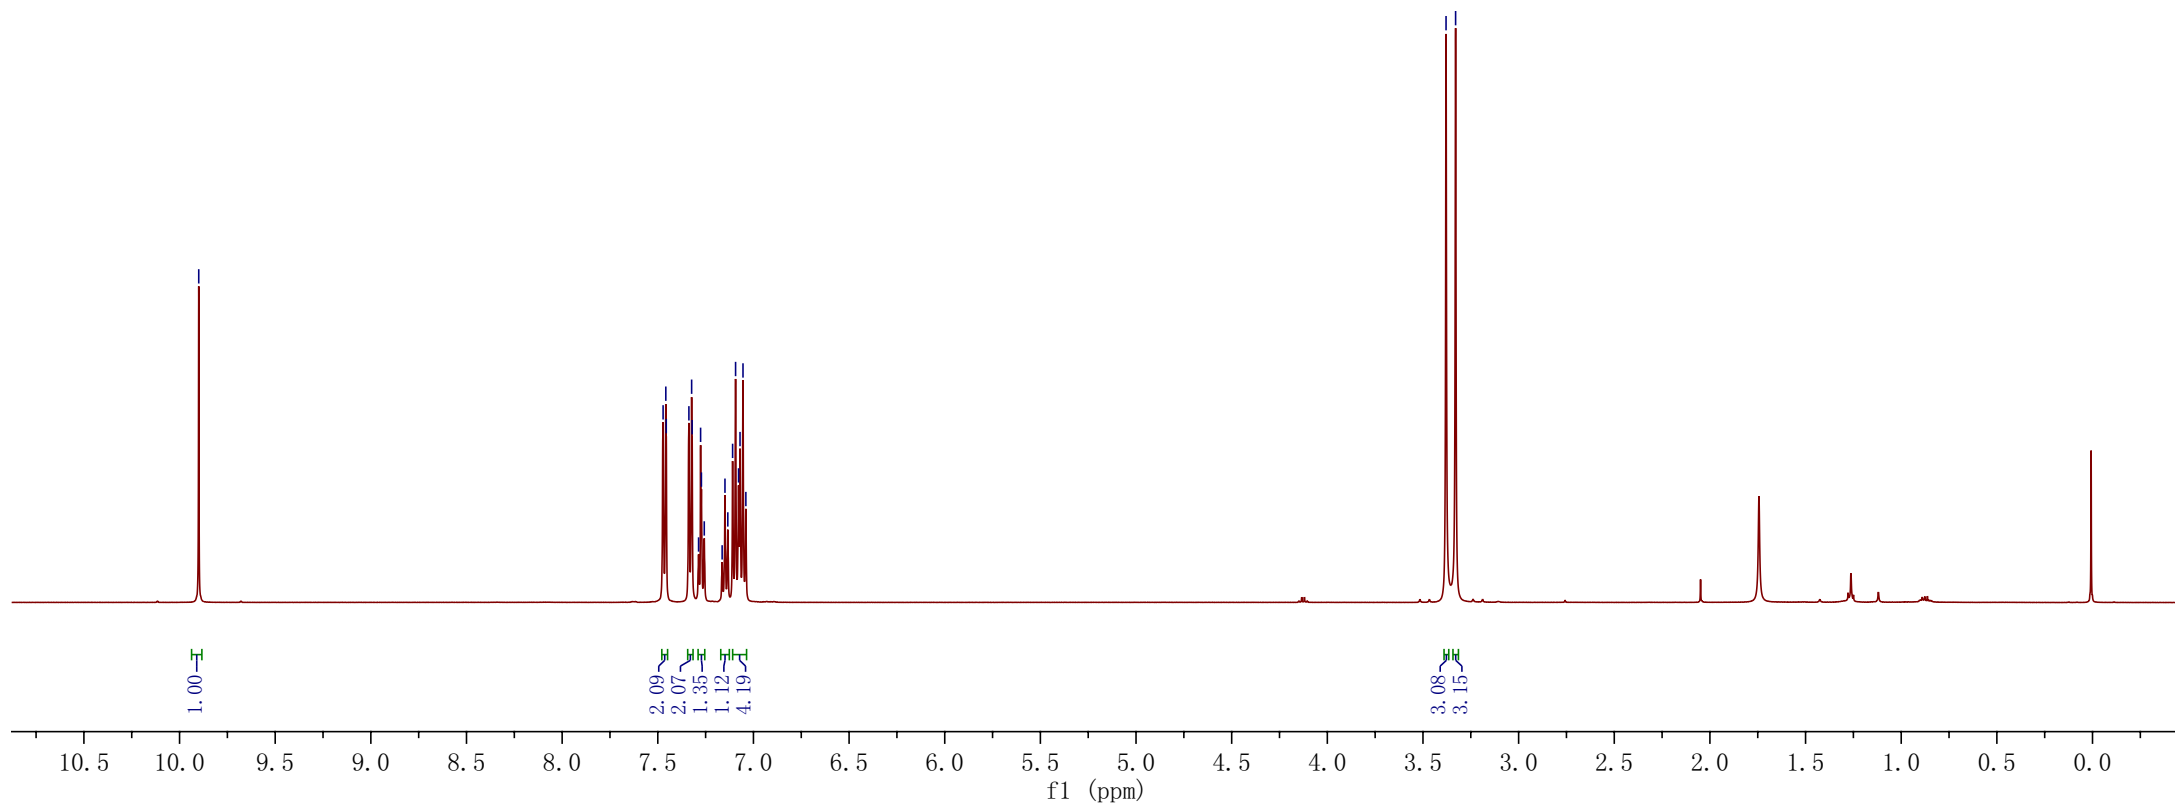

171113  
SC1711109 CDC13 1113

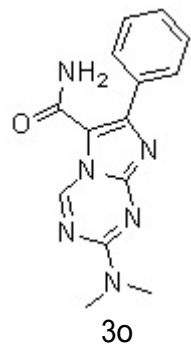

9.9292

7.7459  
7.5042  
7.2759

5.7372

5.3667

3.3489  
3.2853

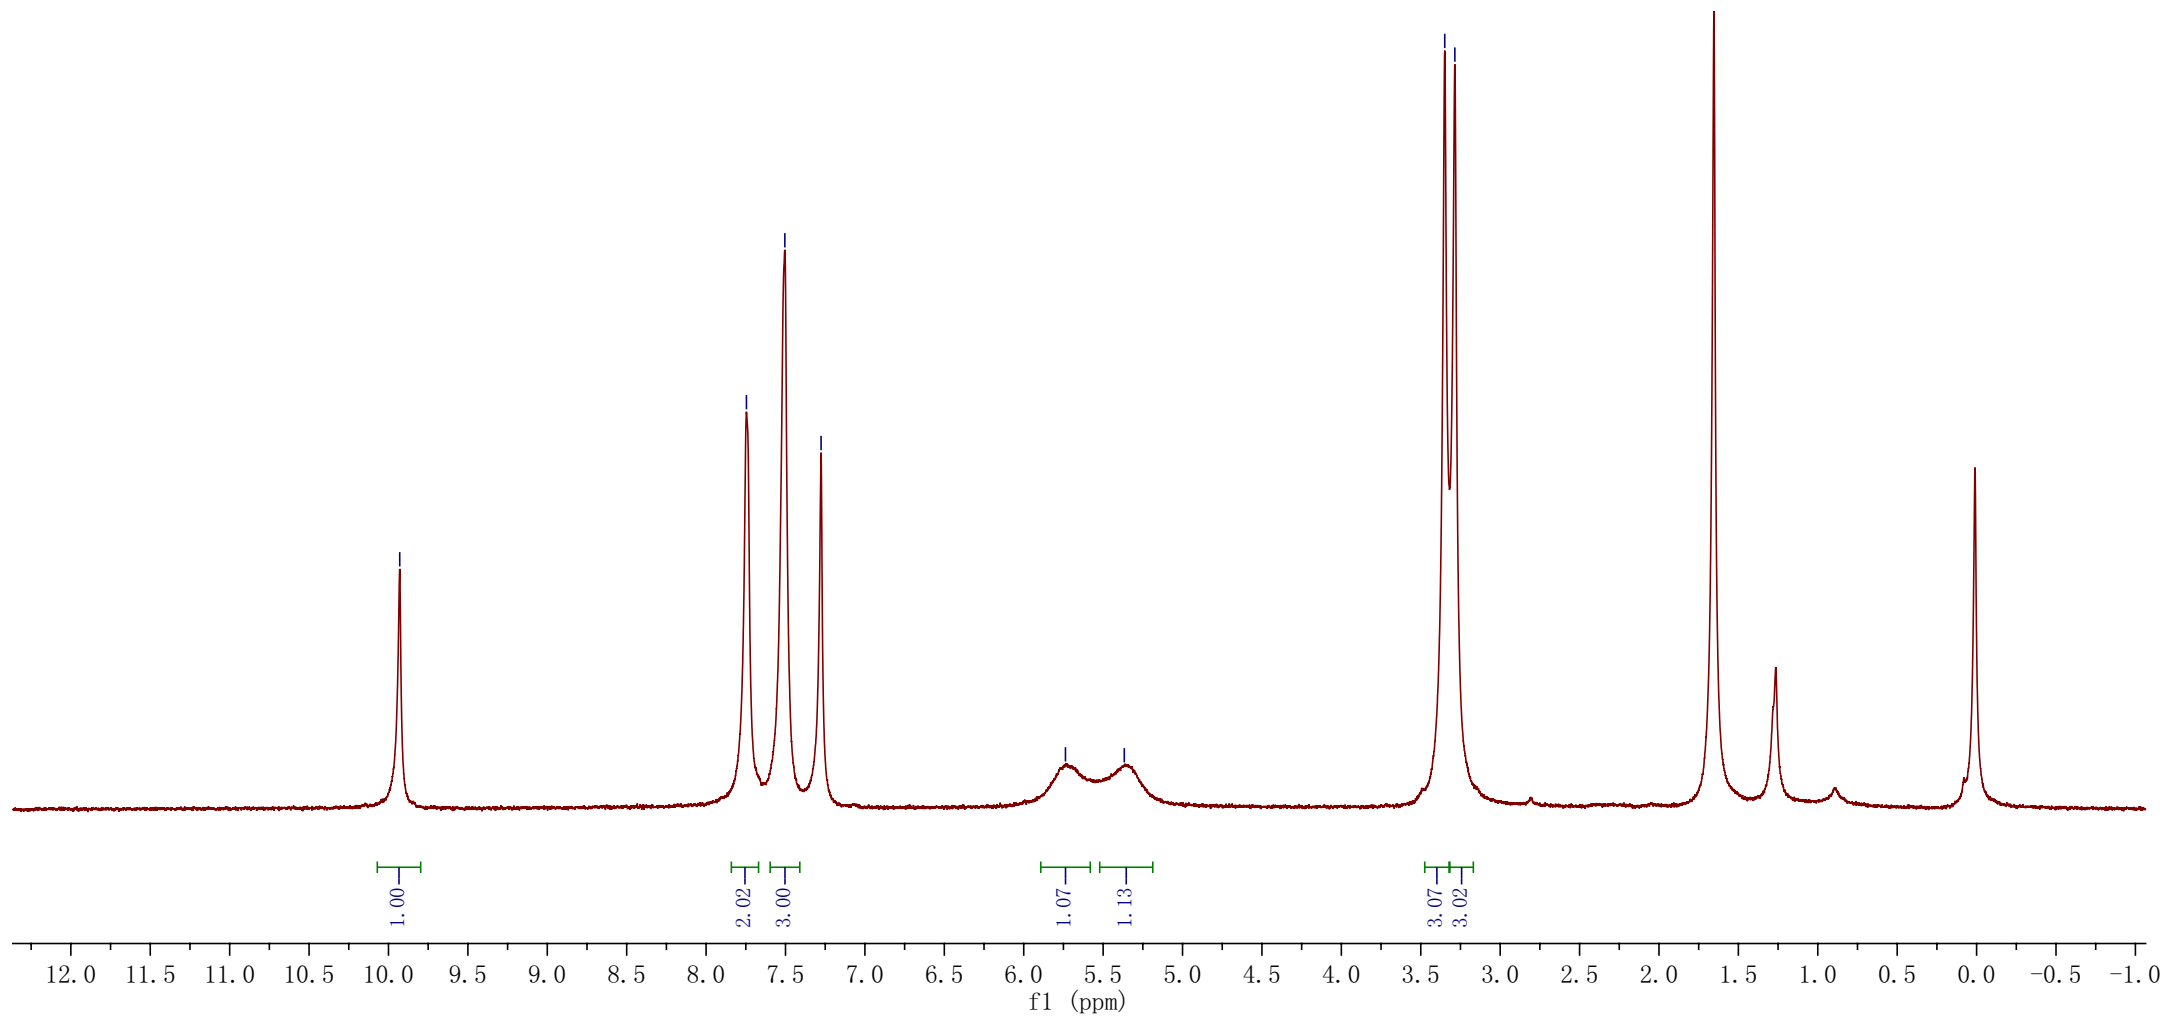

SC171109

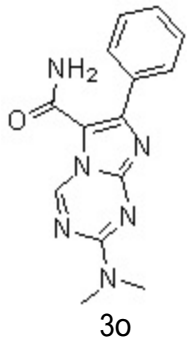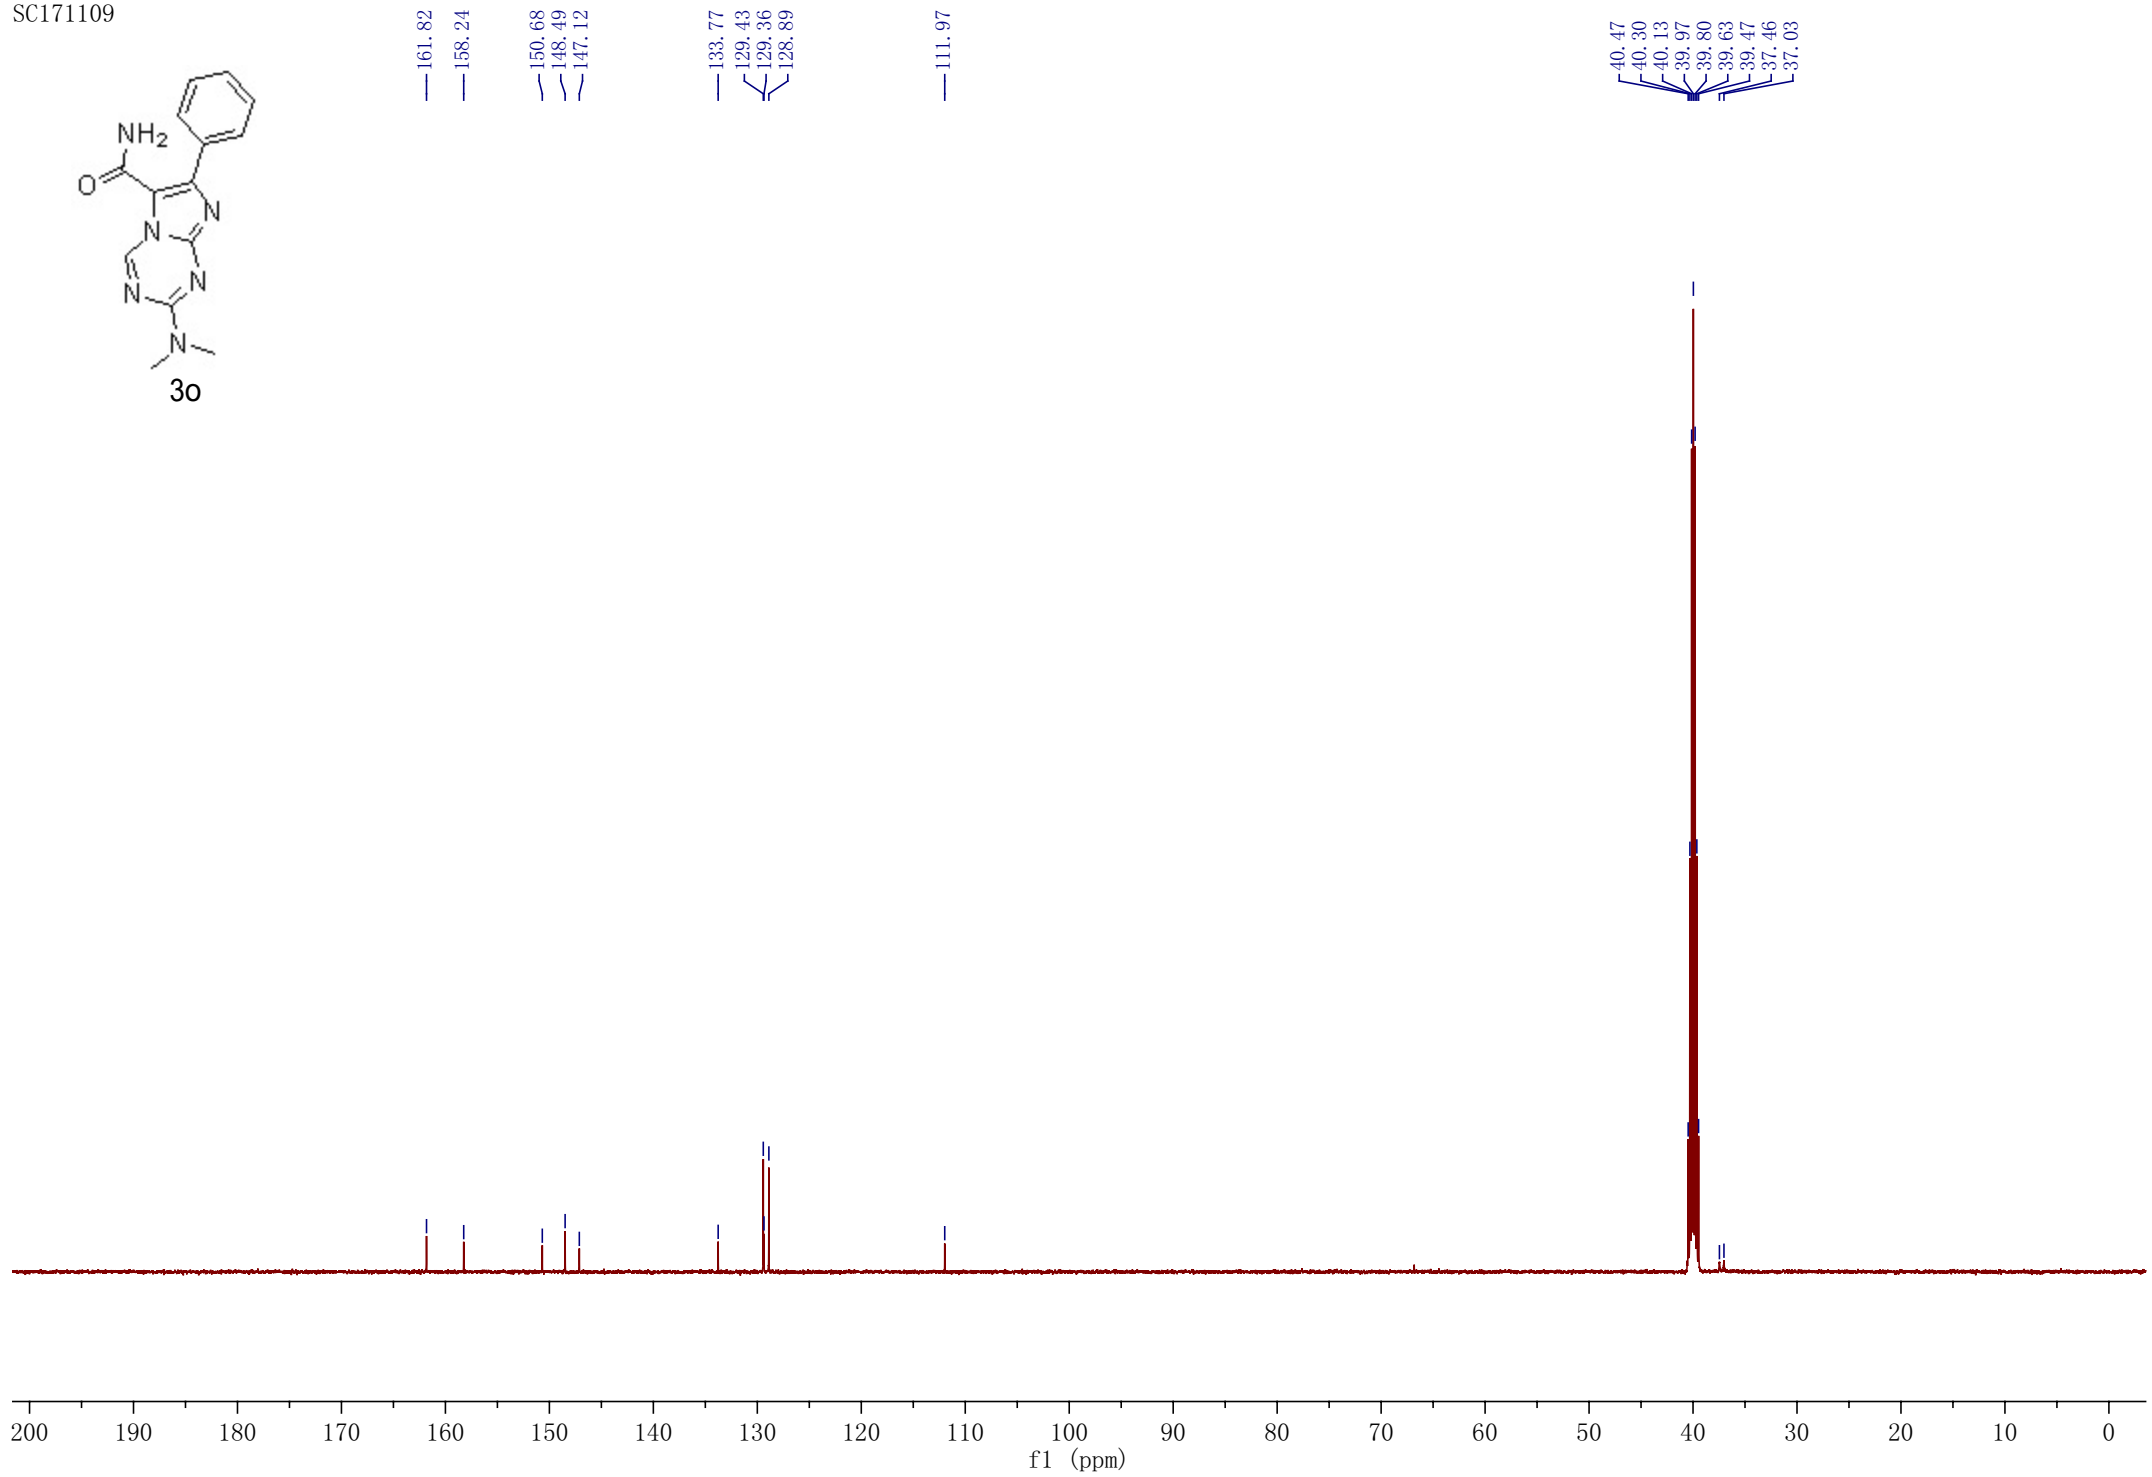



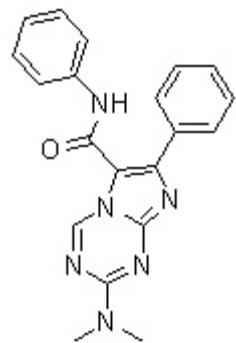

3p

9.93

7.79  
7.78  
7.59  
7.56  
7.55  
7.30  
7.29  
7.27  
7.26  
7.10  
7.08  
7.07

3.35  
3.28

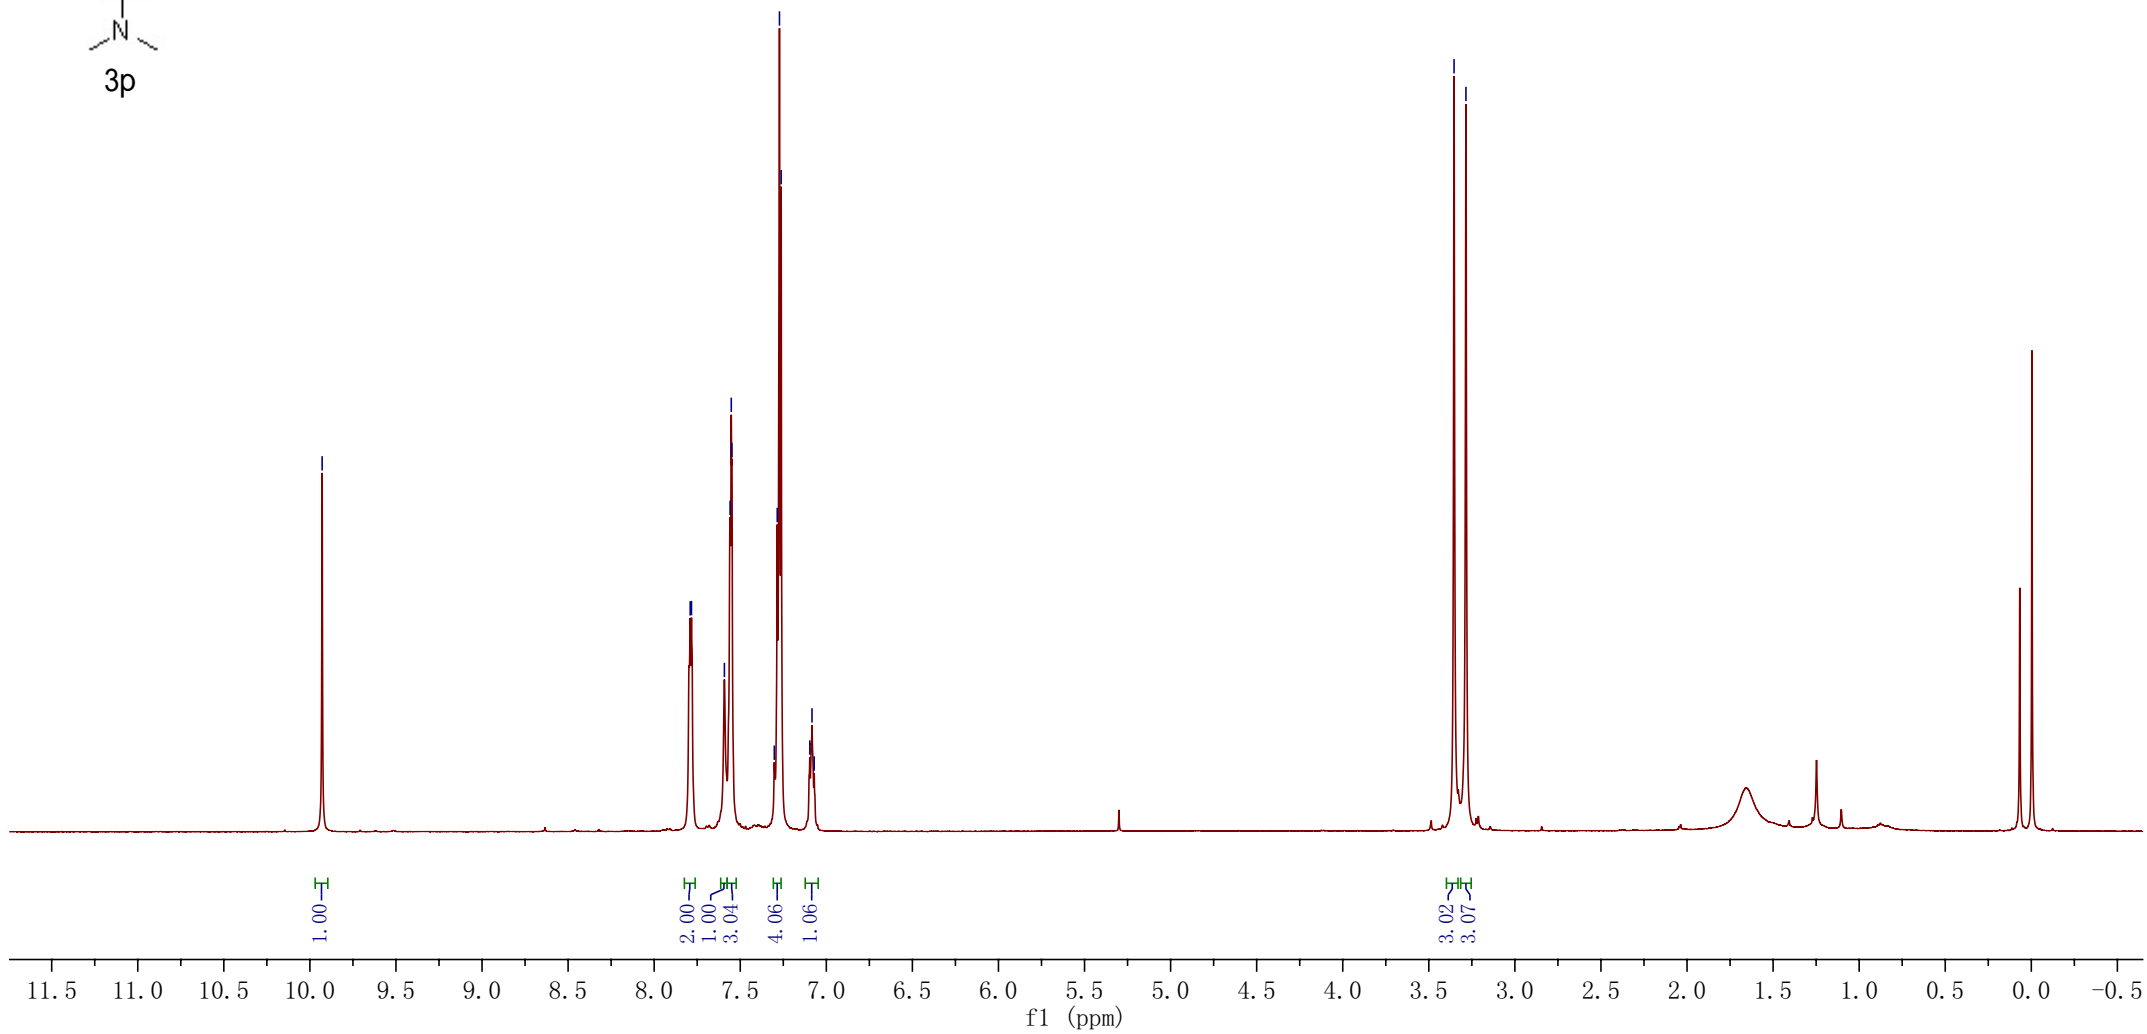

SC171123

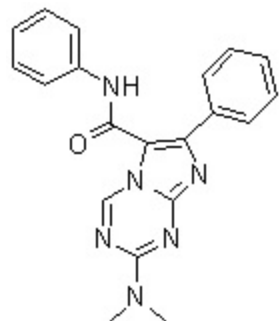

3p

158.63  
158.12

152.28  
149.95  
148.12

137.47  
133.07  
130.19  
129.83  
129.20  
129.11  
124.26

119.39

111.18

77.28  
77.03  
76.78

37.49  
37.16

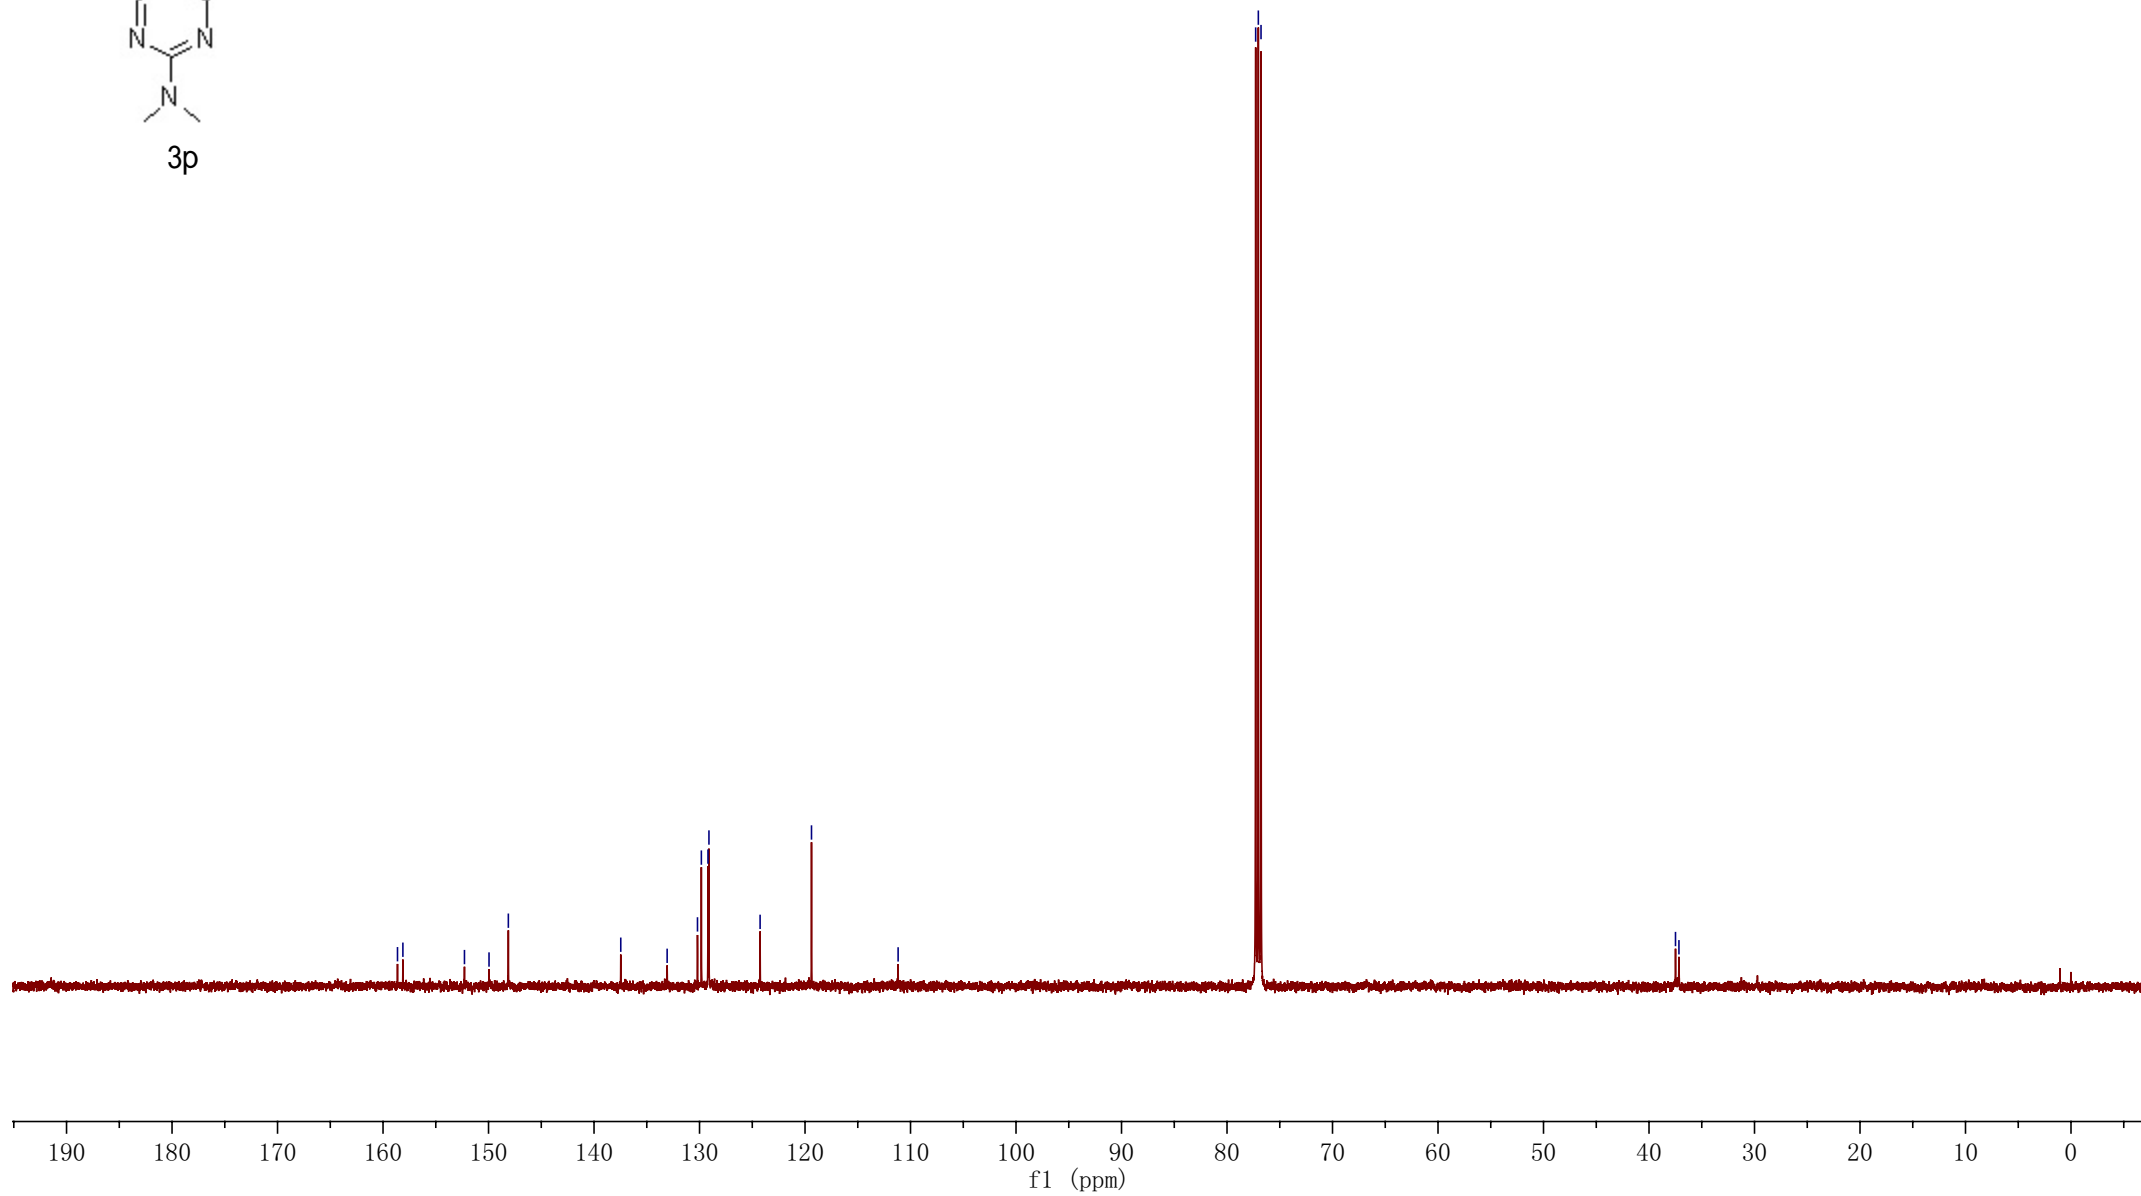

171205  
SC171125A 17-12-05

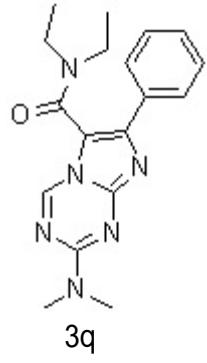

8.9348  
8.9332

7.7826  
7.7694  
7.7674  
7.4027  
7.4002  
7.3897  
7.3750  
7.3726  
7.3582  
7.2762

3.5795  
3.2913  
3.2518  
3.0511

1.2383

0.7593

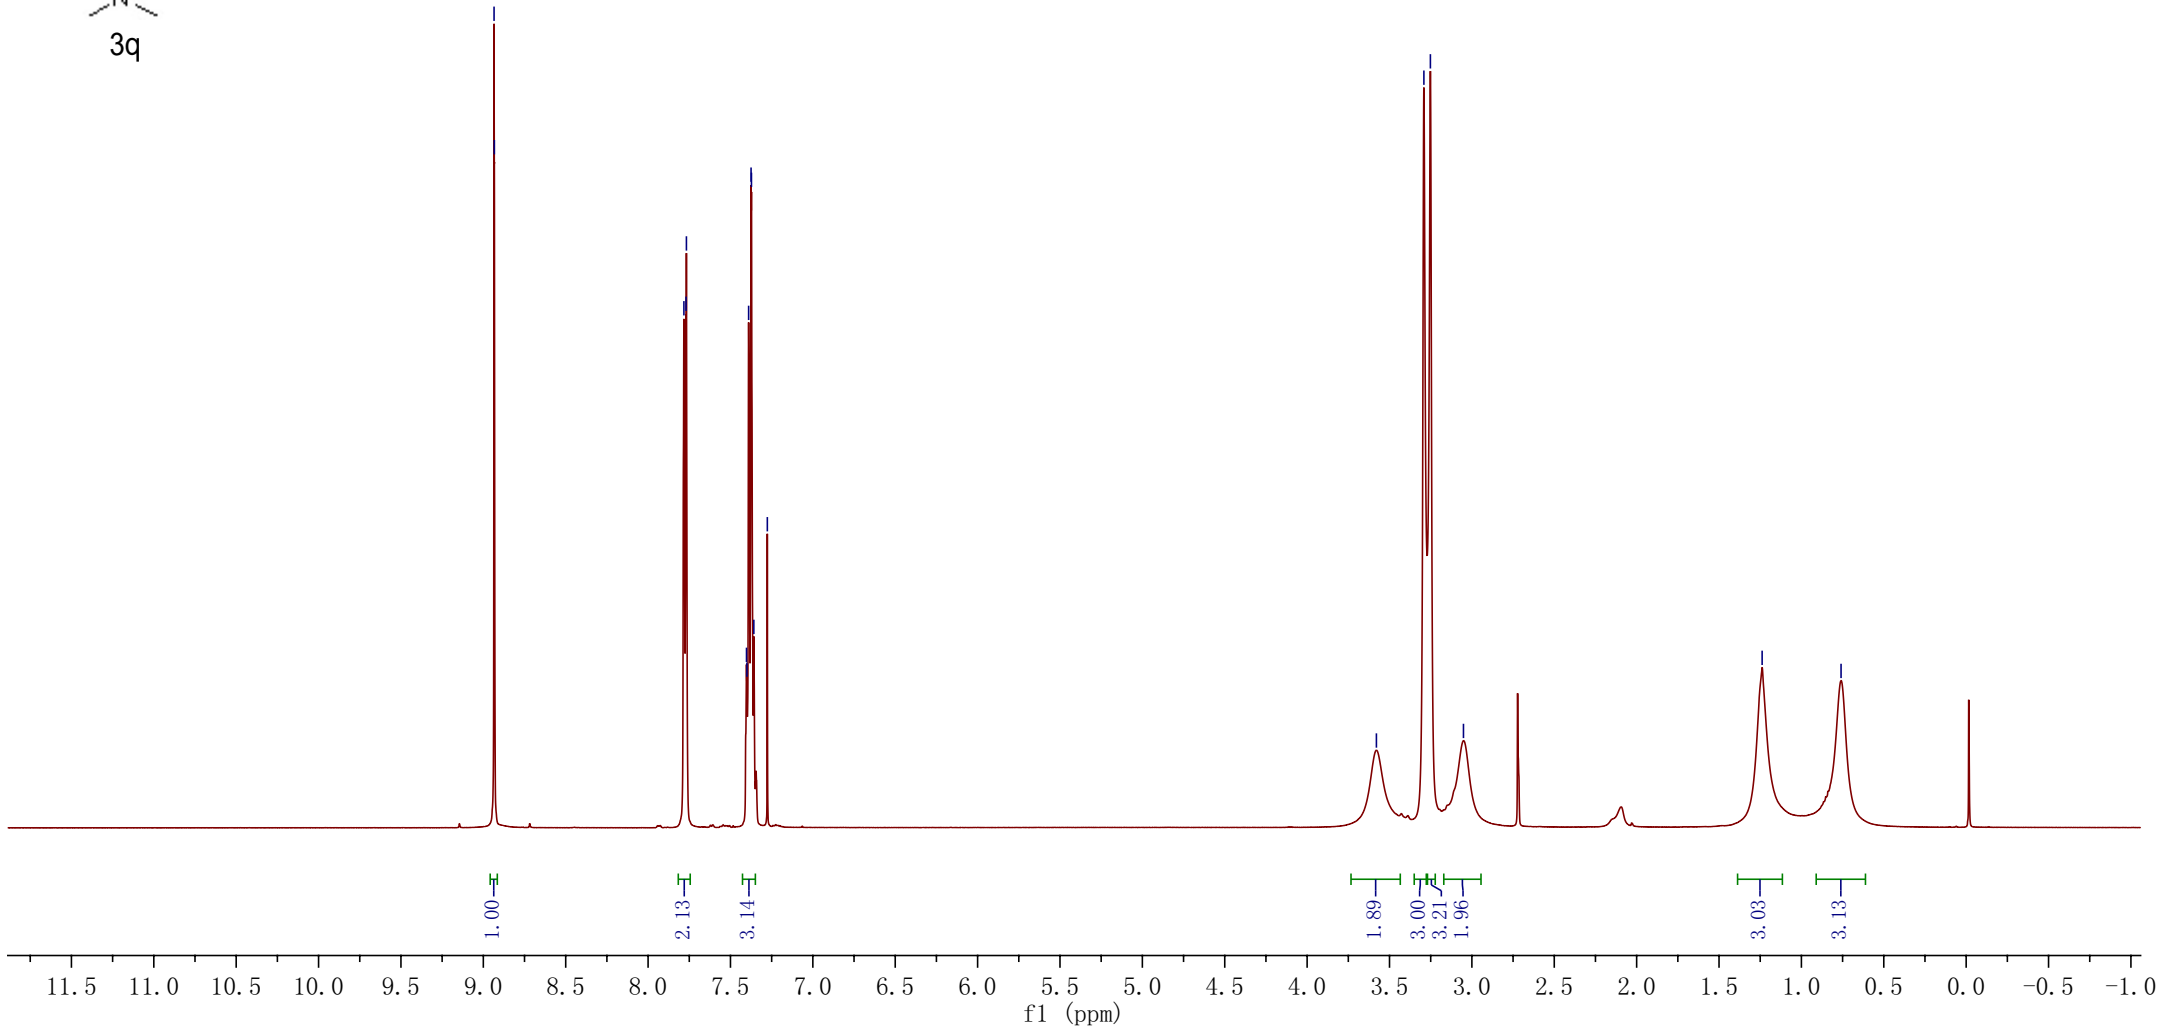

171218  
SC1711125A CDC13 1218

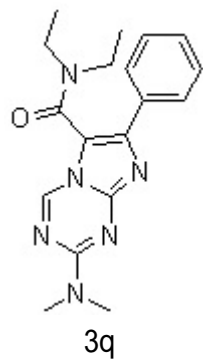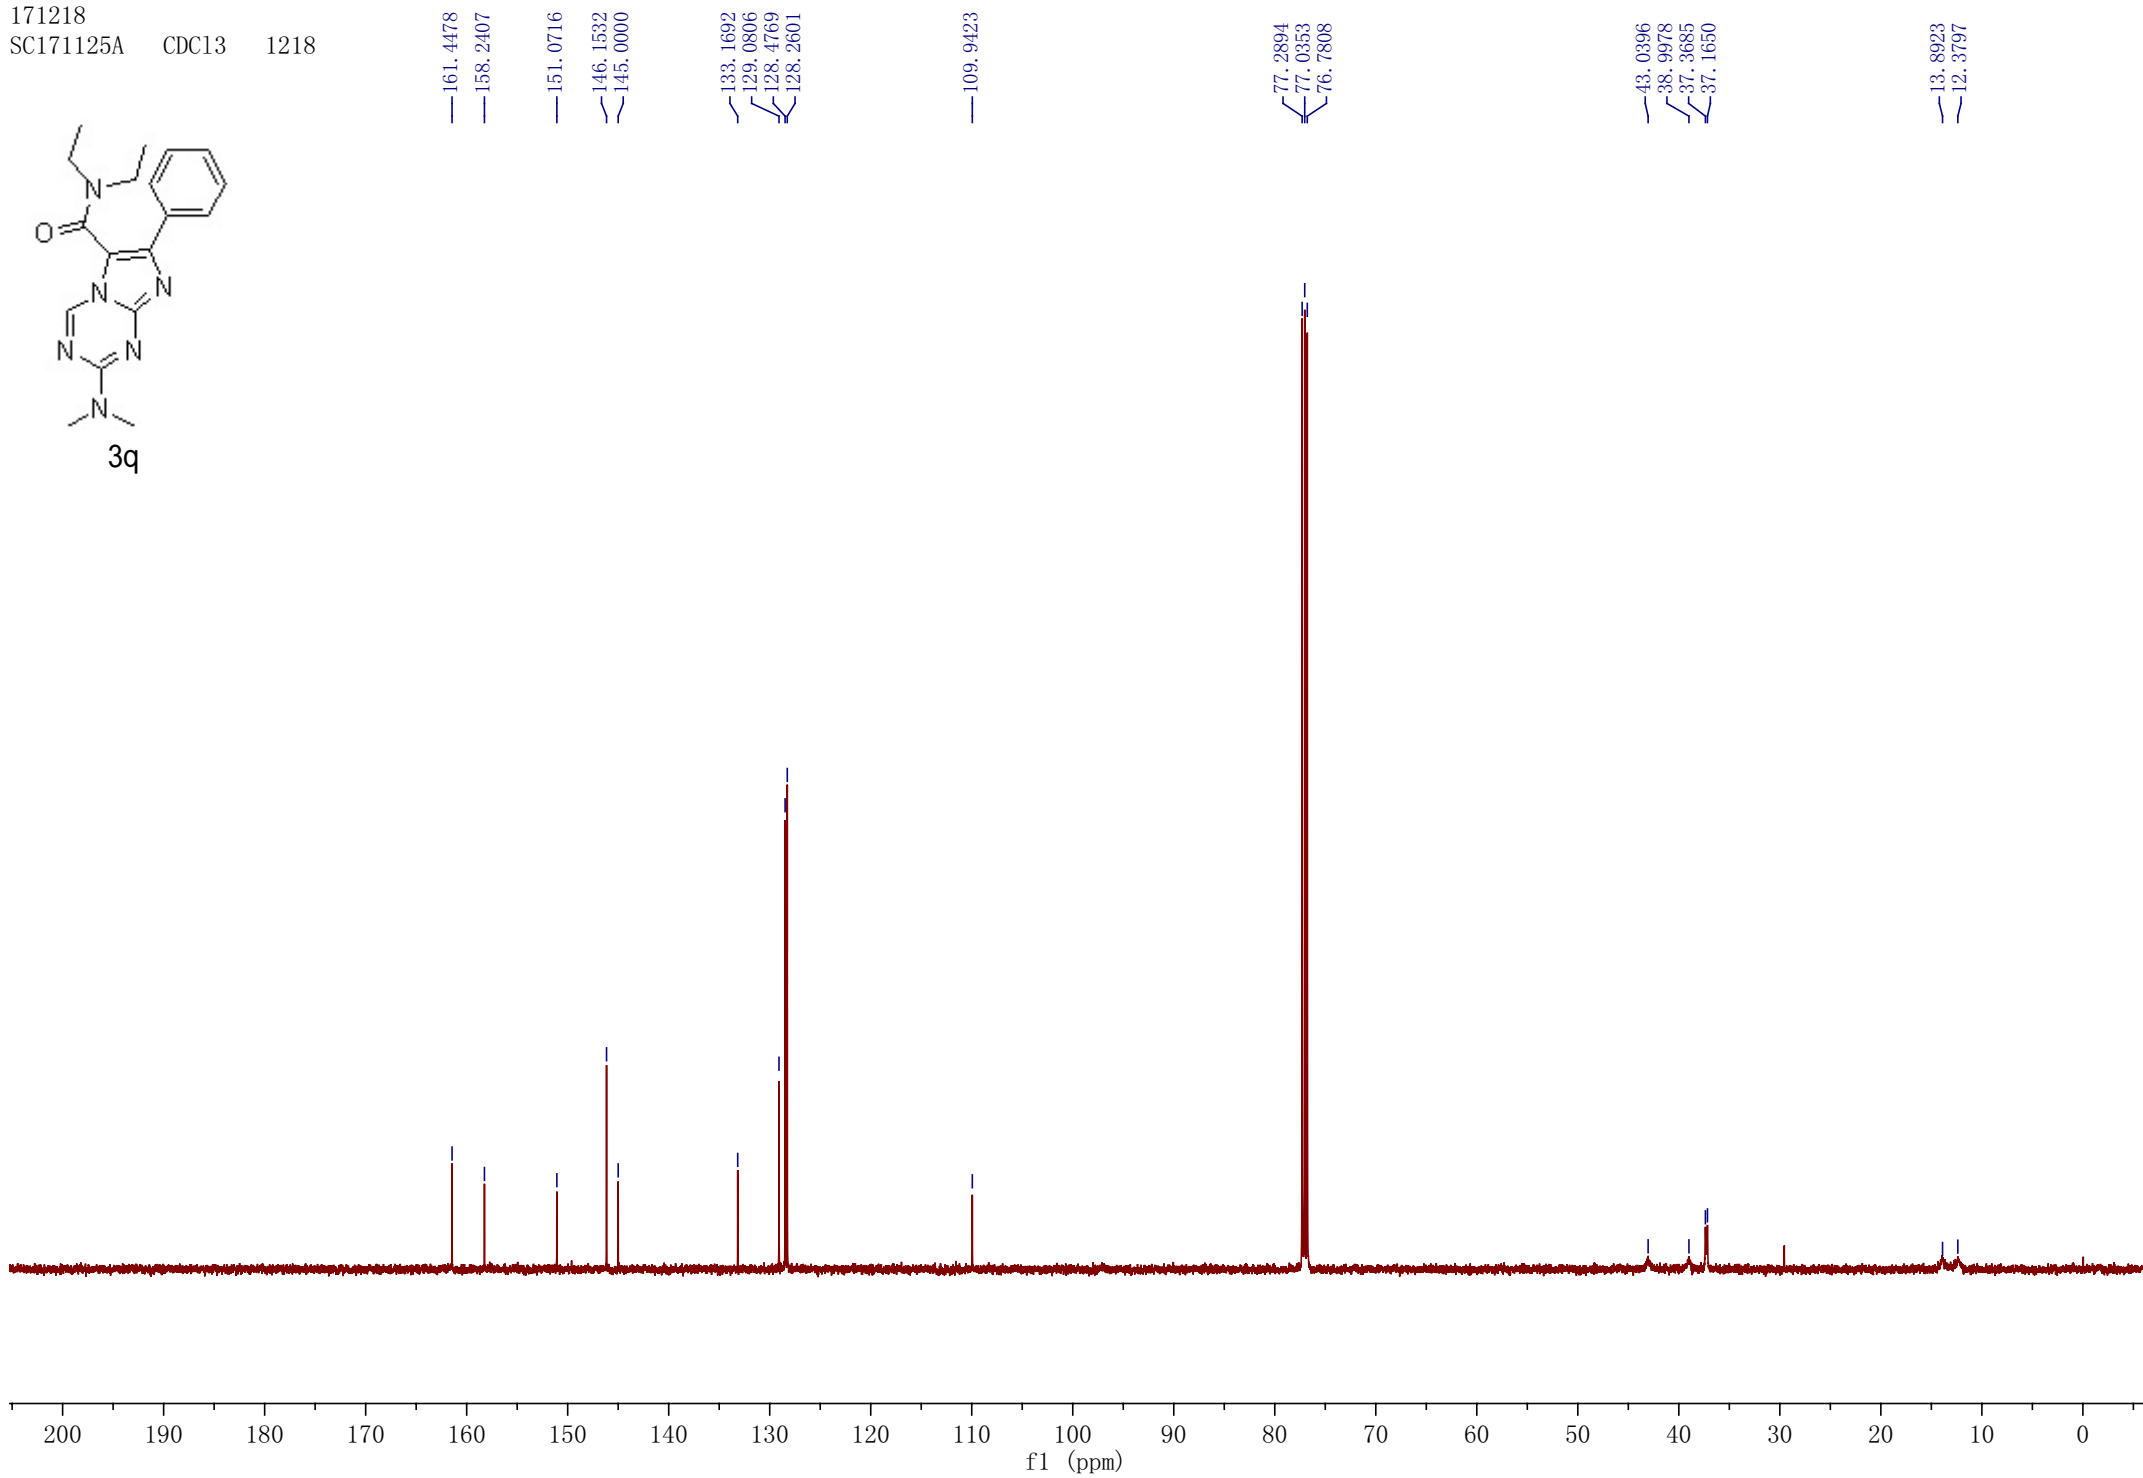

171205  
SC171125B 17-12-05

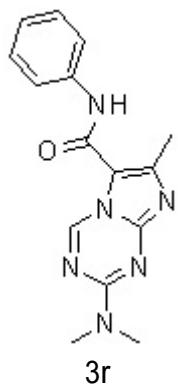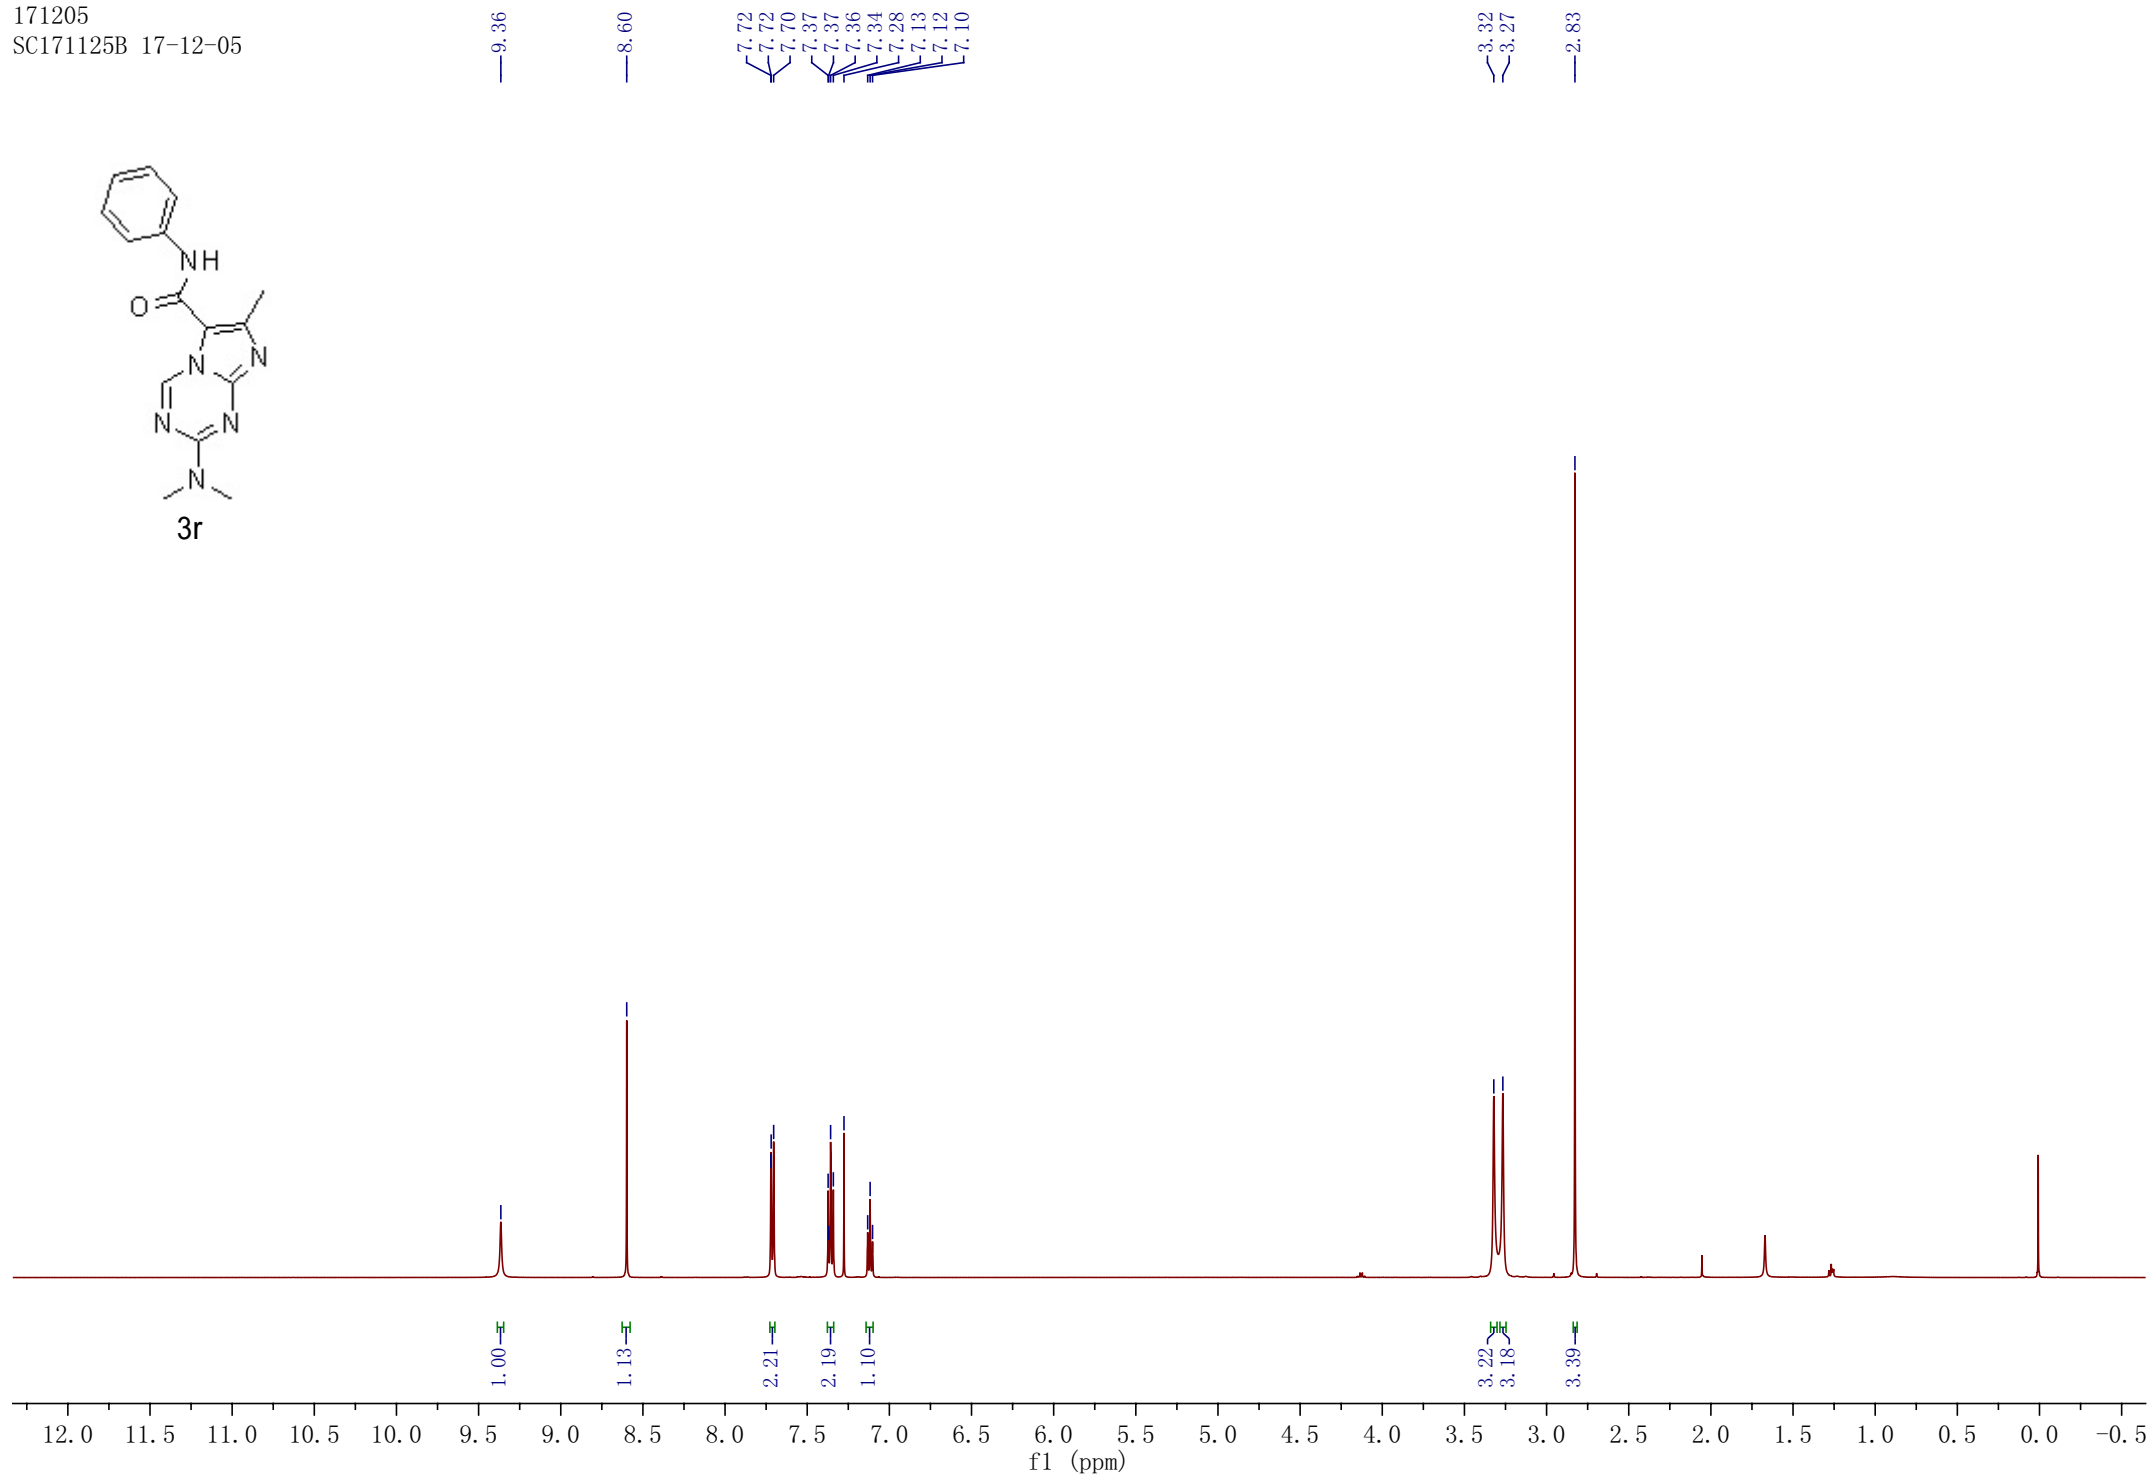

SC171225B碳+17A171132  
SC171125B CDC13 1212

—161.45  
—157.95

—148.01  
—144.33

—138.11  
—133.32

—128.98  
—123.94  
—120.02  
—119.44

77.29  
77.04  
76.78

37.51  
37.30

—8.35

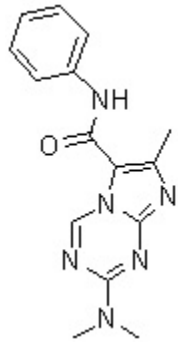

3r

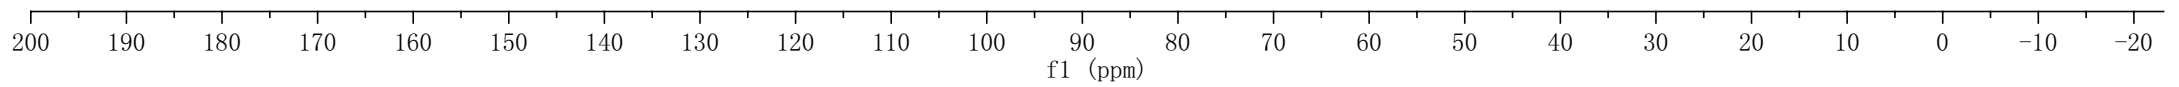

171018  
sc171016 CDC13 1018

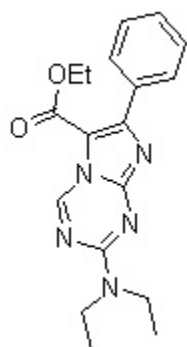

3s

9.6873

7.9157  
7.9103  
7.9071  
7.9041  
7.9030  
7.8993  
7.8965  
7.4220  
7.4158  
7.4091  
7.2759

4.3445  
4.3303  
4.3160  
4.3017  
3.7500  
3.7399  
3.7364  
3.7265

1.7639  
1.3047  
1.2904  
1.2760  
1.2712  
1.2618  
1.2529  
1.2386

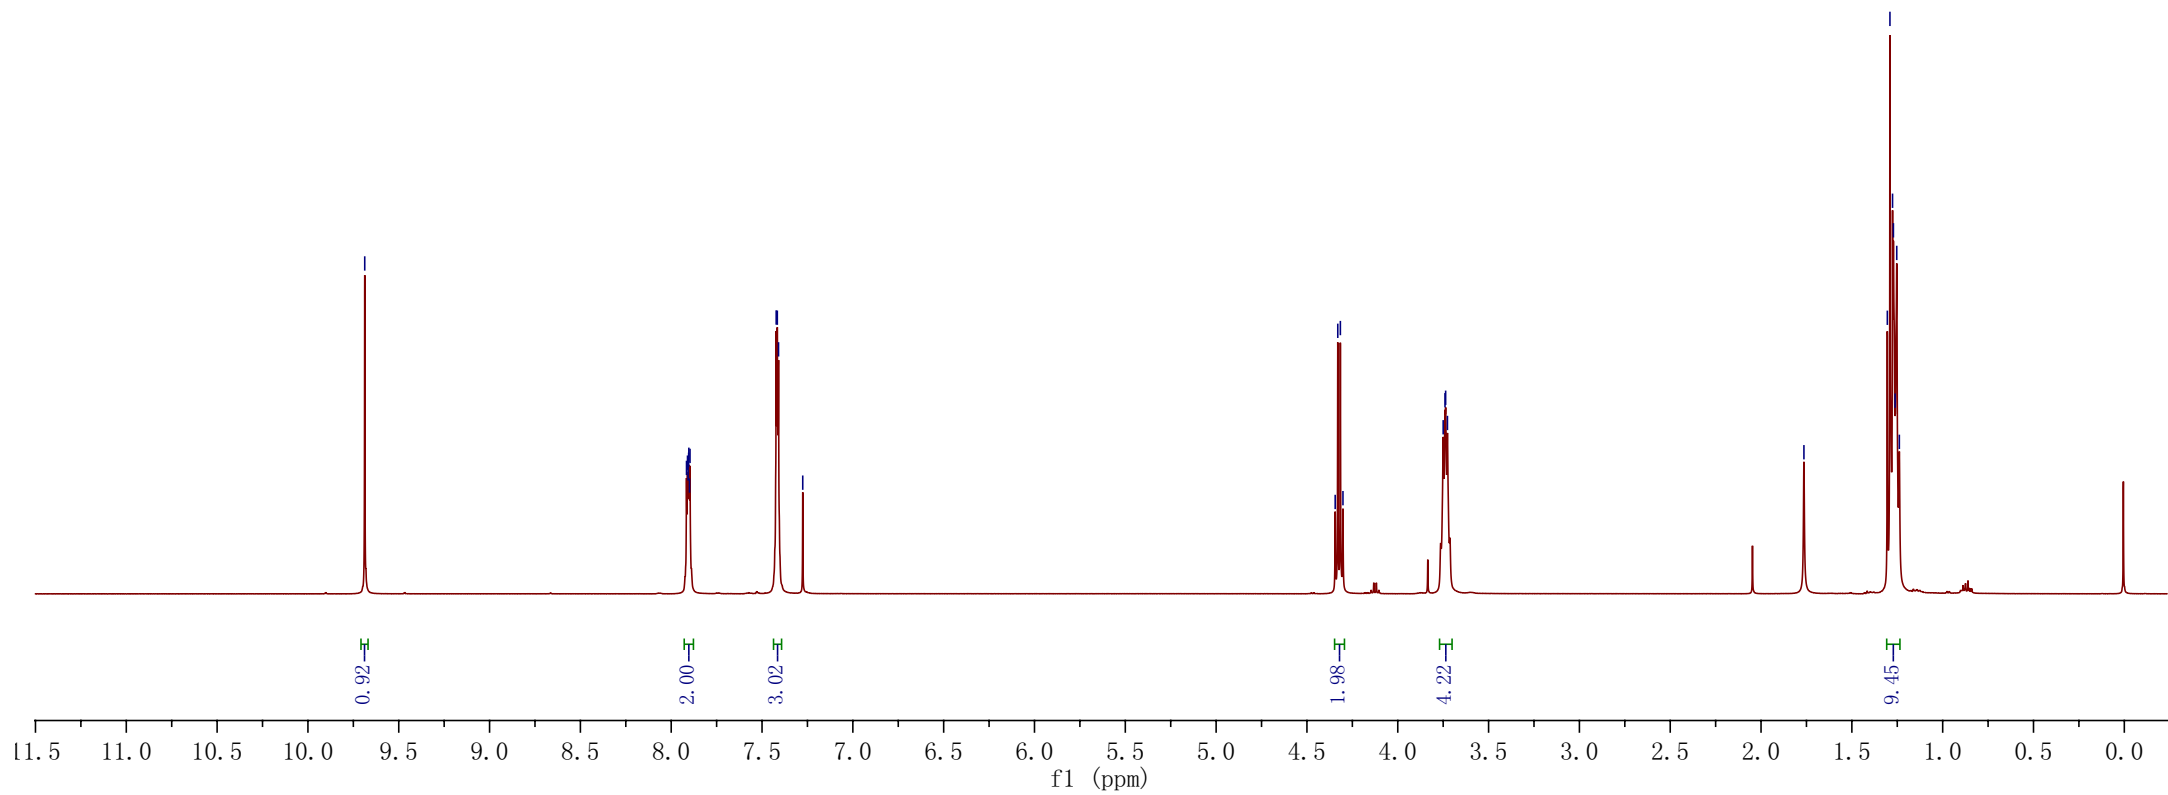

171019  
SC171016 CDC13 1019

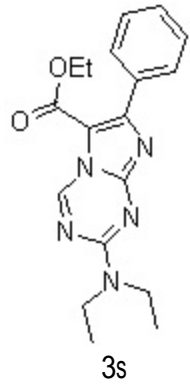

160.2973  
157.7672  
155.1522  
152.8810  
148.0253

133.2706  
130.4813  
129.3463  
127.4789

108.0223

77.3377  
77.0835  
76.8293

60.6770

42.8627  
42.4115

14.1373  
13.5623  
12.5384

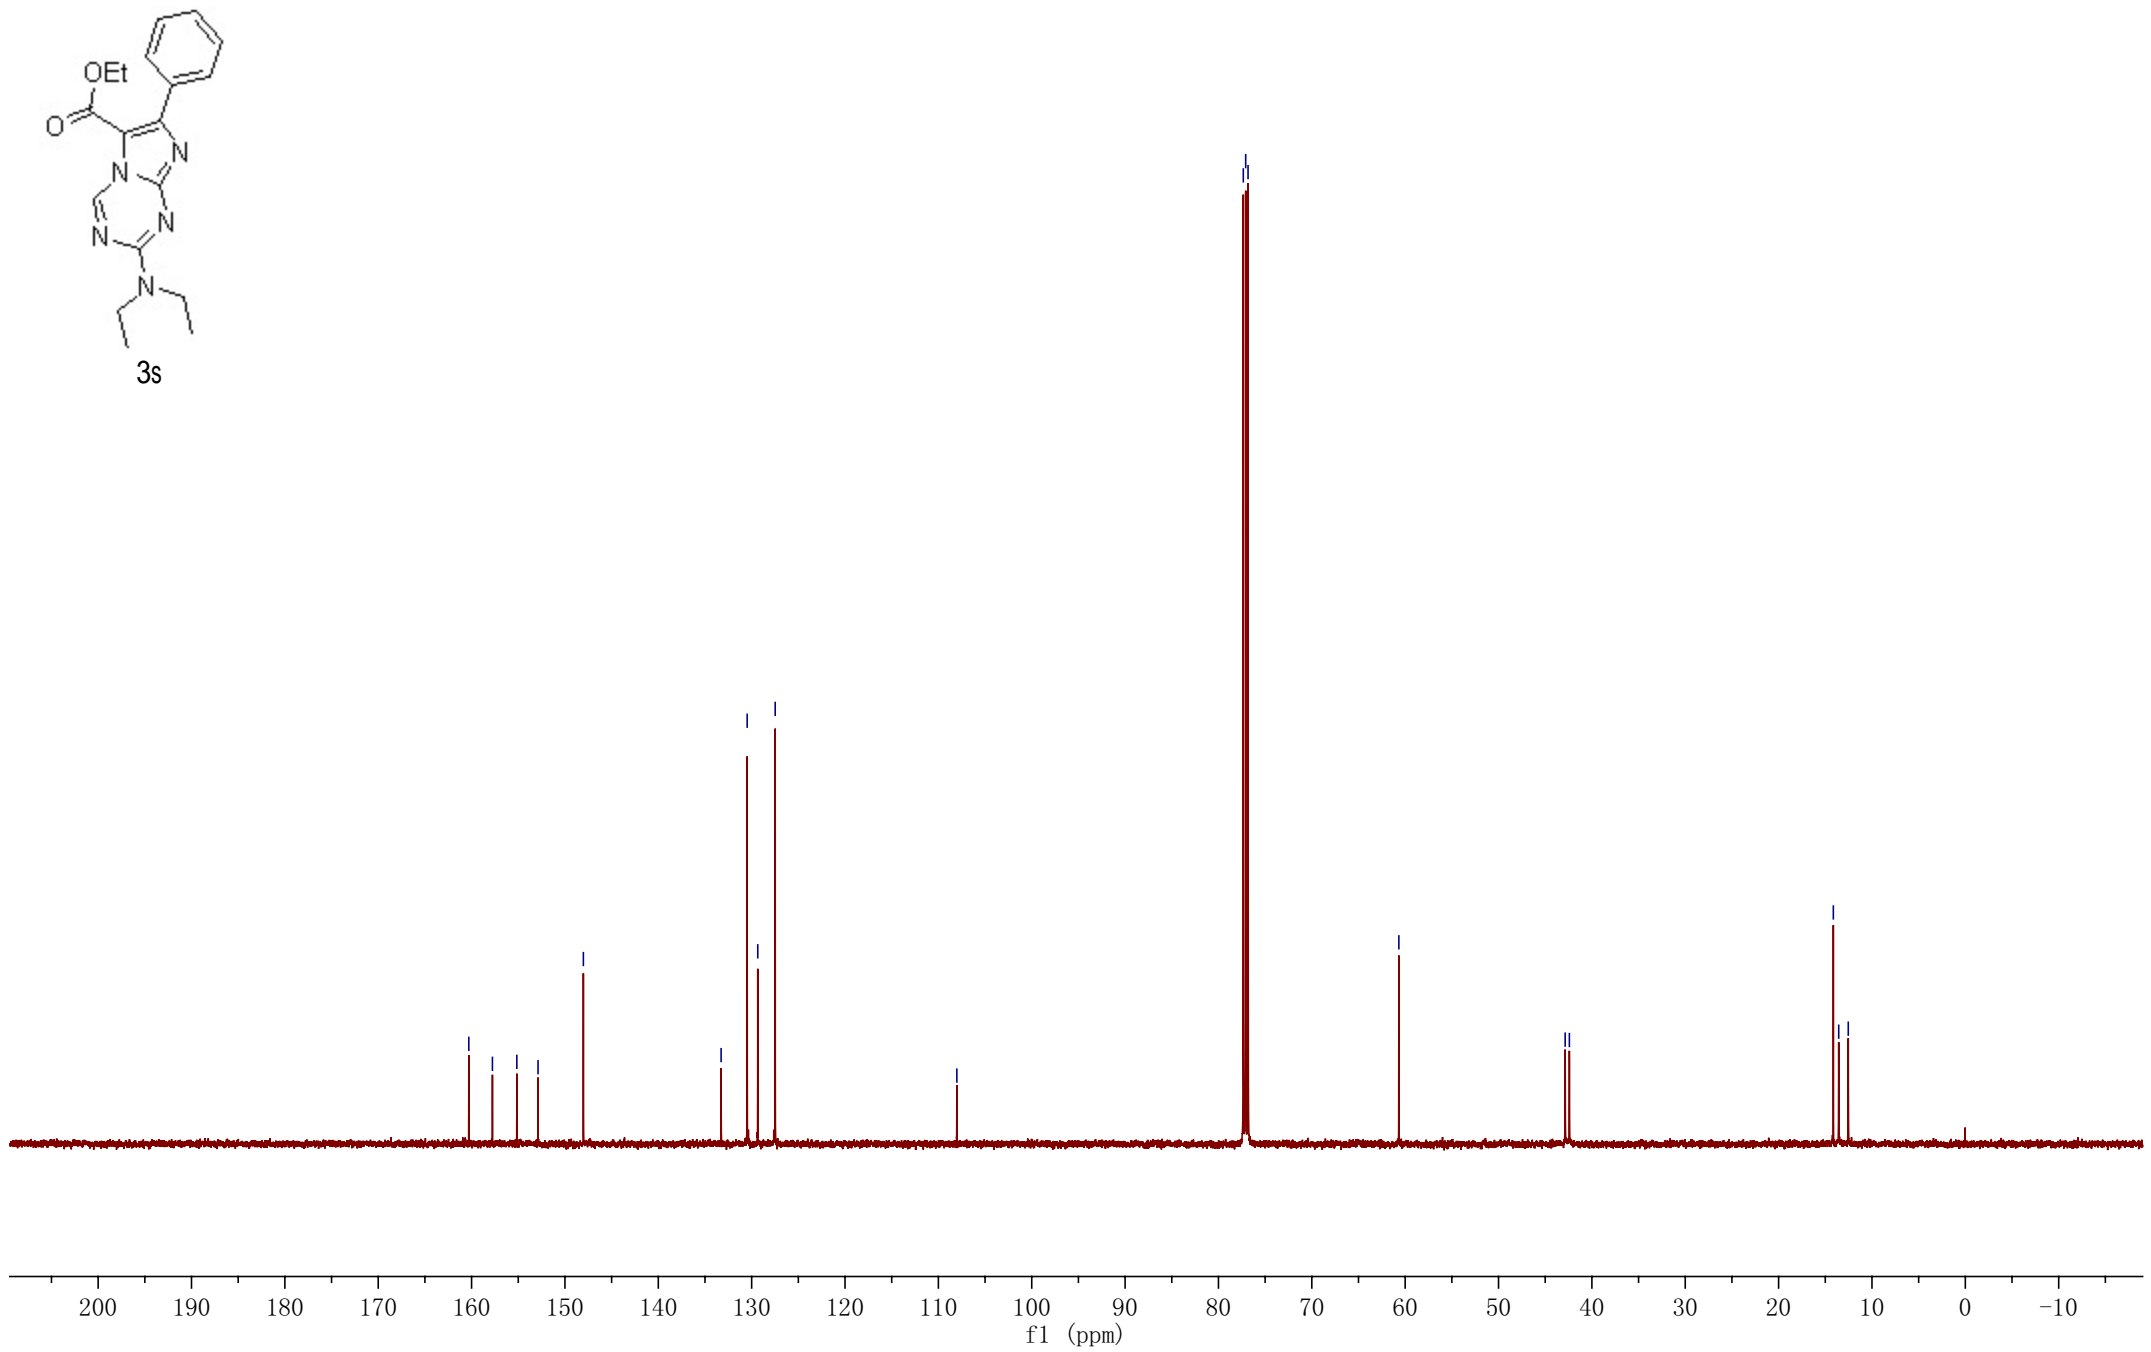



170602  
SC170510B CDC13 0602

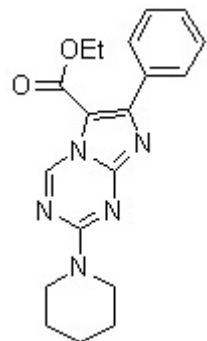

3t

9.6607

7.9152  
7.9099  
7.9064  
7.9032  
7.9026  
7.8988  
7.8959  
7.4225  
7.4190  
7.4164  
7.4096  
7.2762

4.3411  
4.3268  
4.3125  
4.2983  
3.9878  
3.9376

2.0476  
1.7155  
1.6603  
1.6328  
1.6223  
1.2880  
1.2738  
1.2615  
1.2472

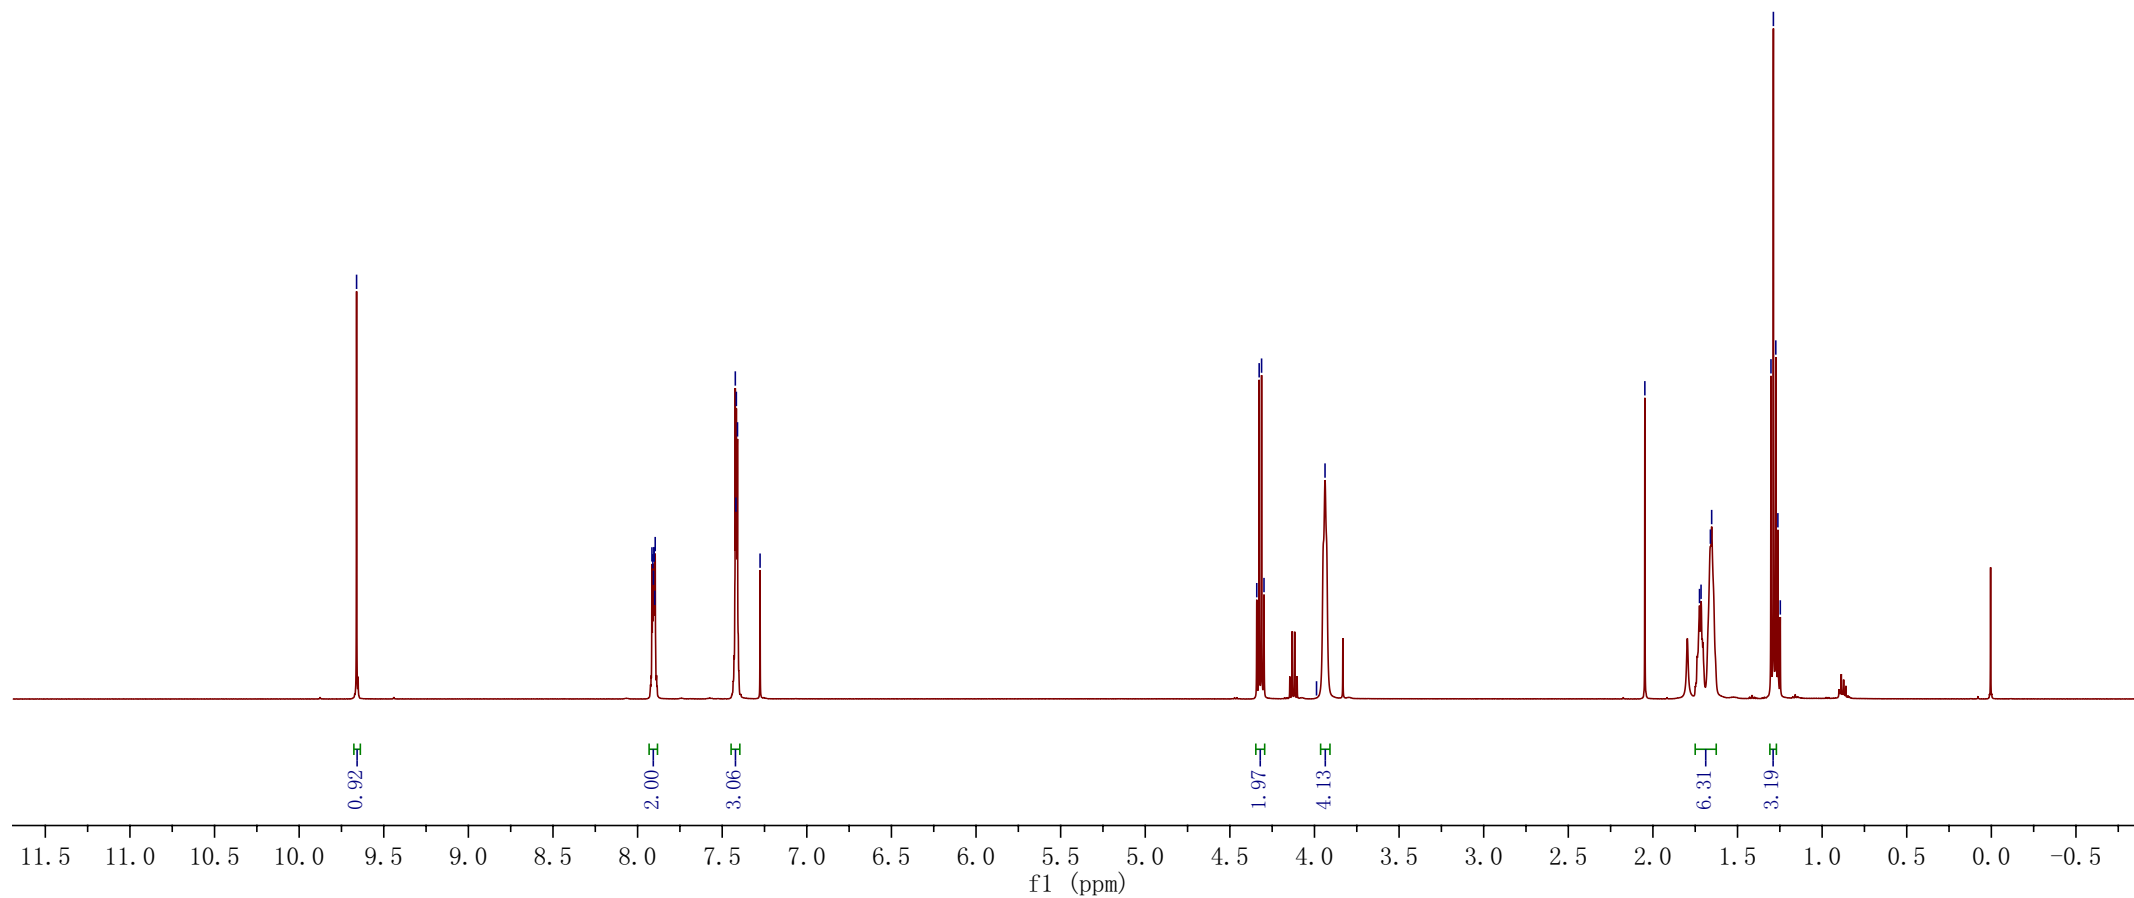

170607  
SC170510B CDC13 0607

160.23  
157.63  
155.14  
152.83  
148.04

133.17  
130.39  
129.31  
127.44

108.14

77.29  
77.03  
76.78

60.65

45.78  
44.97

26.13  
25.48  
24.57

14.07

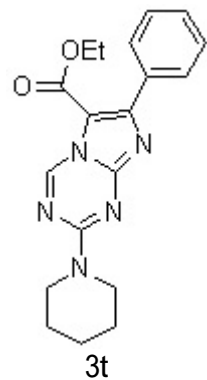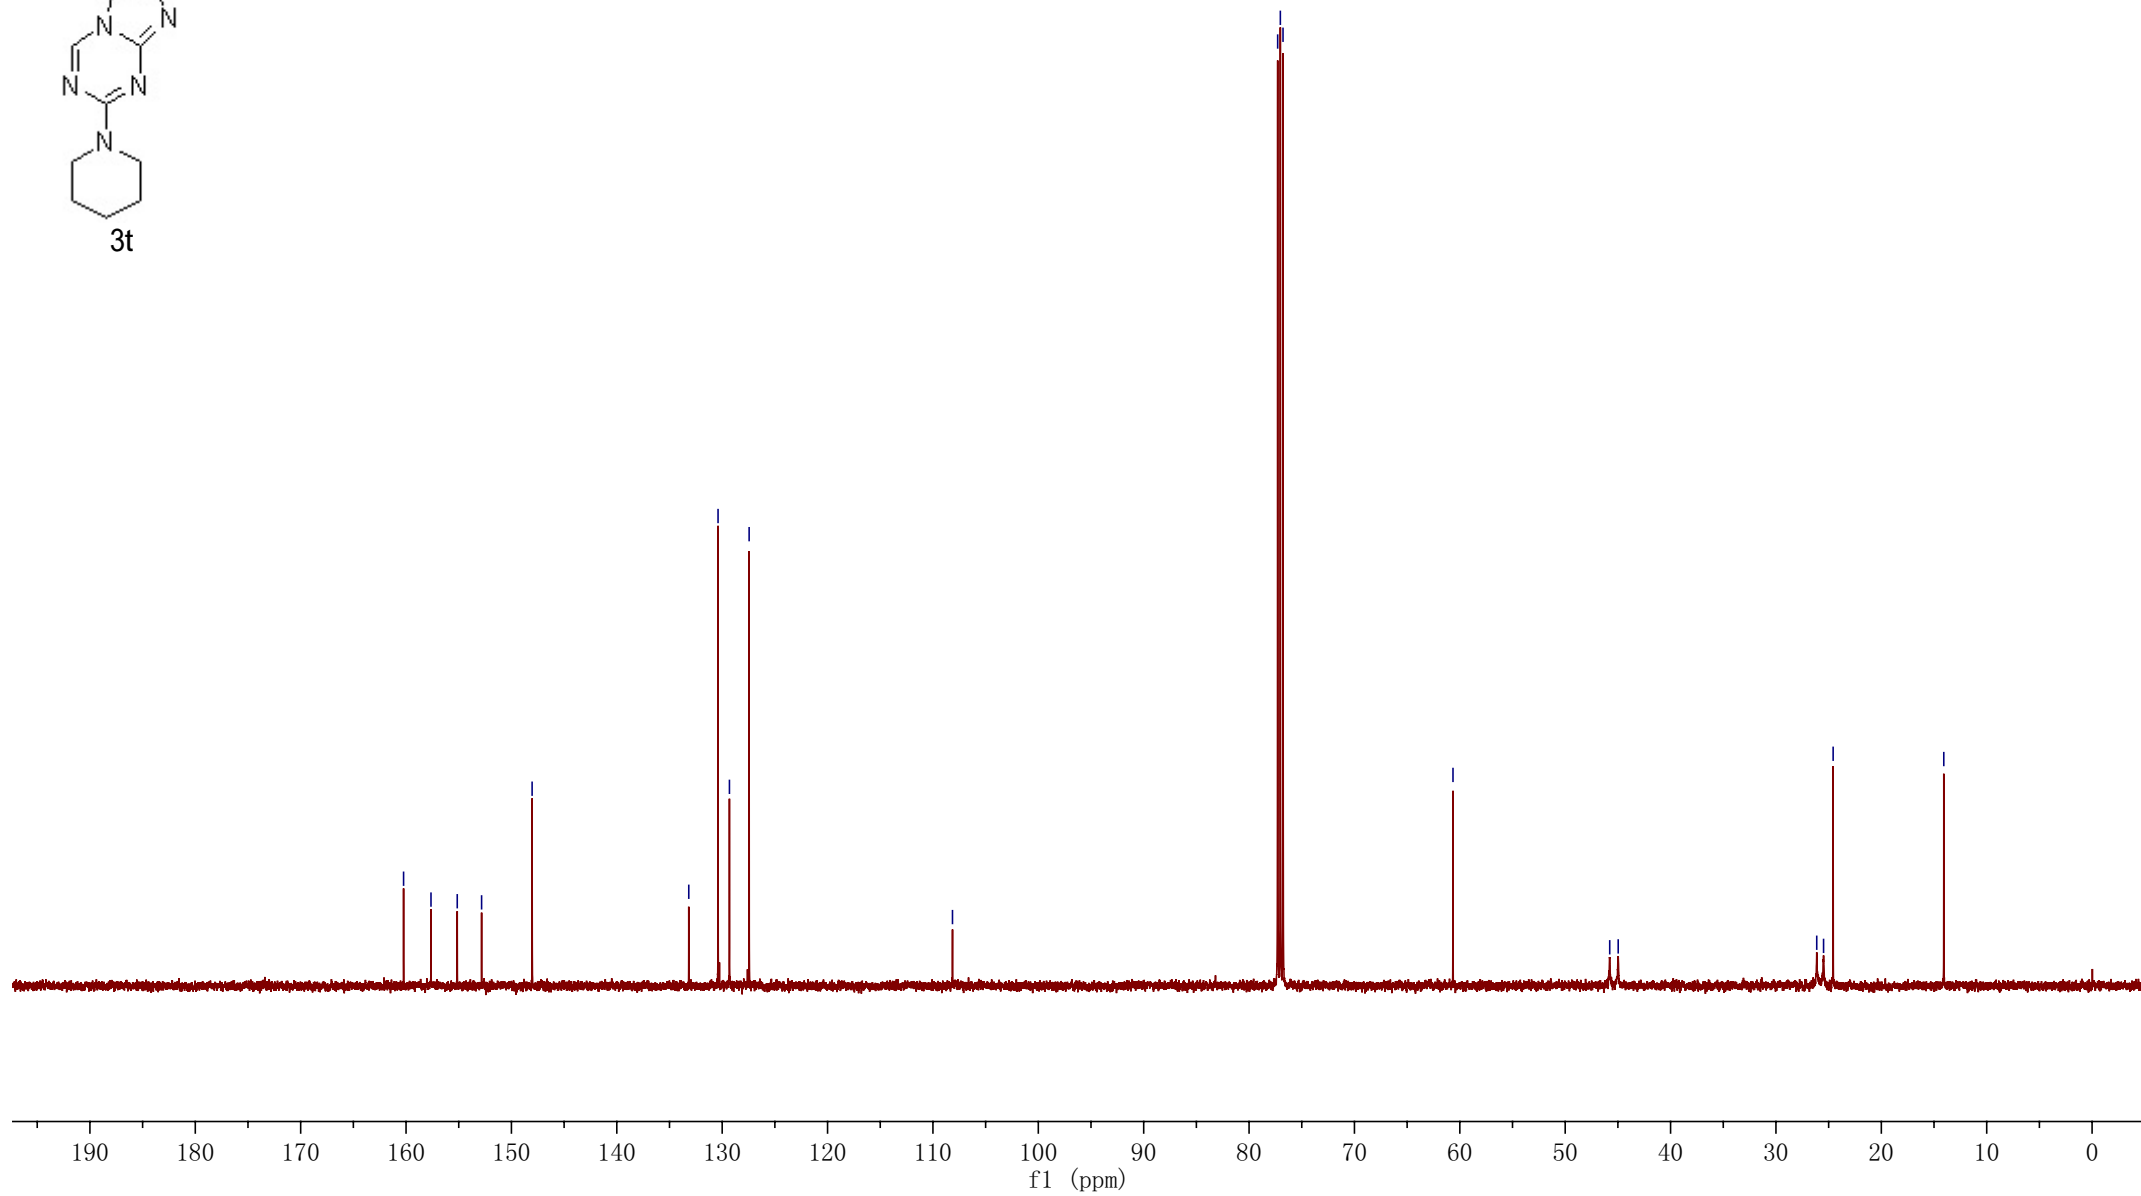

170602  
SC170513B CDC13 0602

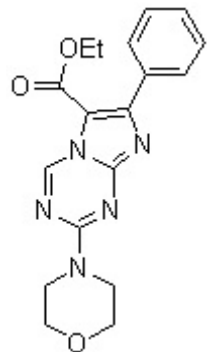

3u

9.7220

7.9041  
7.8996  
7.8922  
7.8848  
7.4304  
7.4255  
7.4185  
7.2761

4.3483  
4.3340  
4.3198  
4.3055  
3.9872  
3.7915  
3.7816  
3.7722

1.3030  
1.2888  
1.2745

0.6962

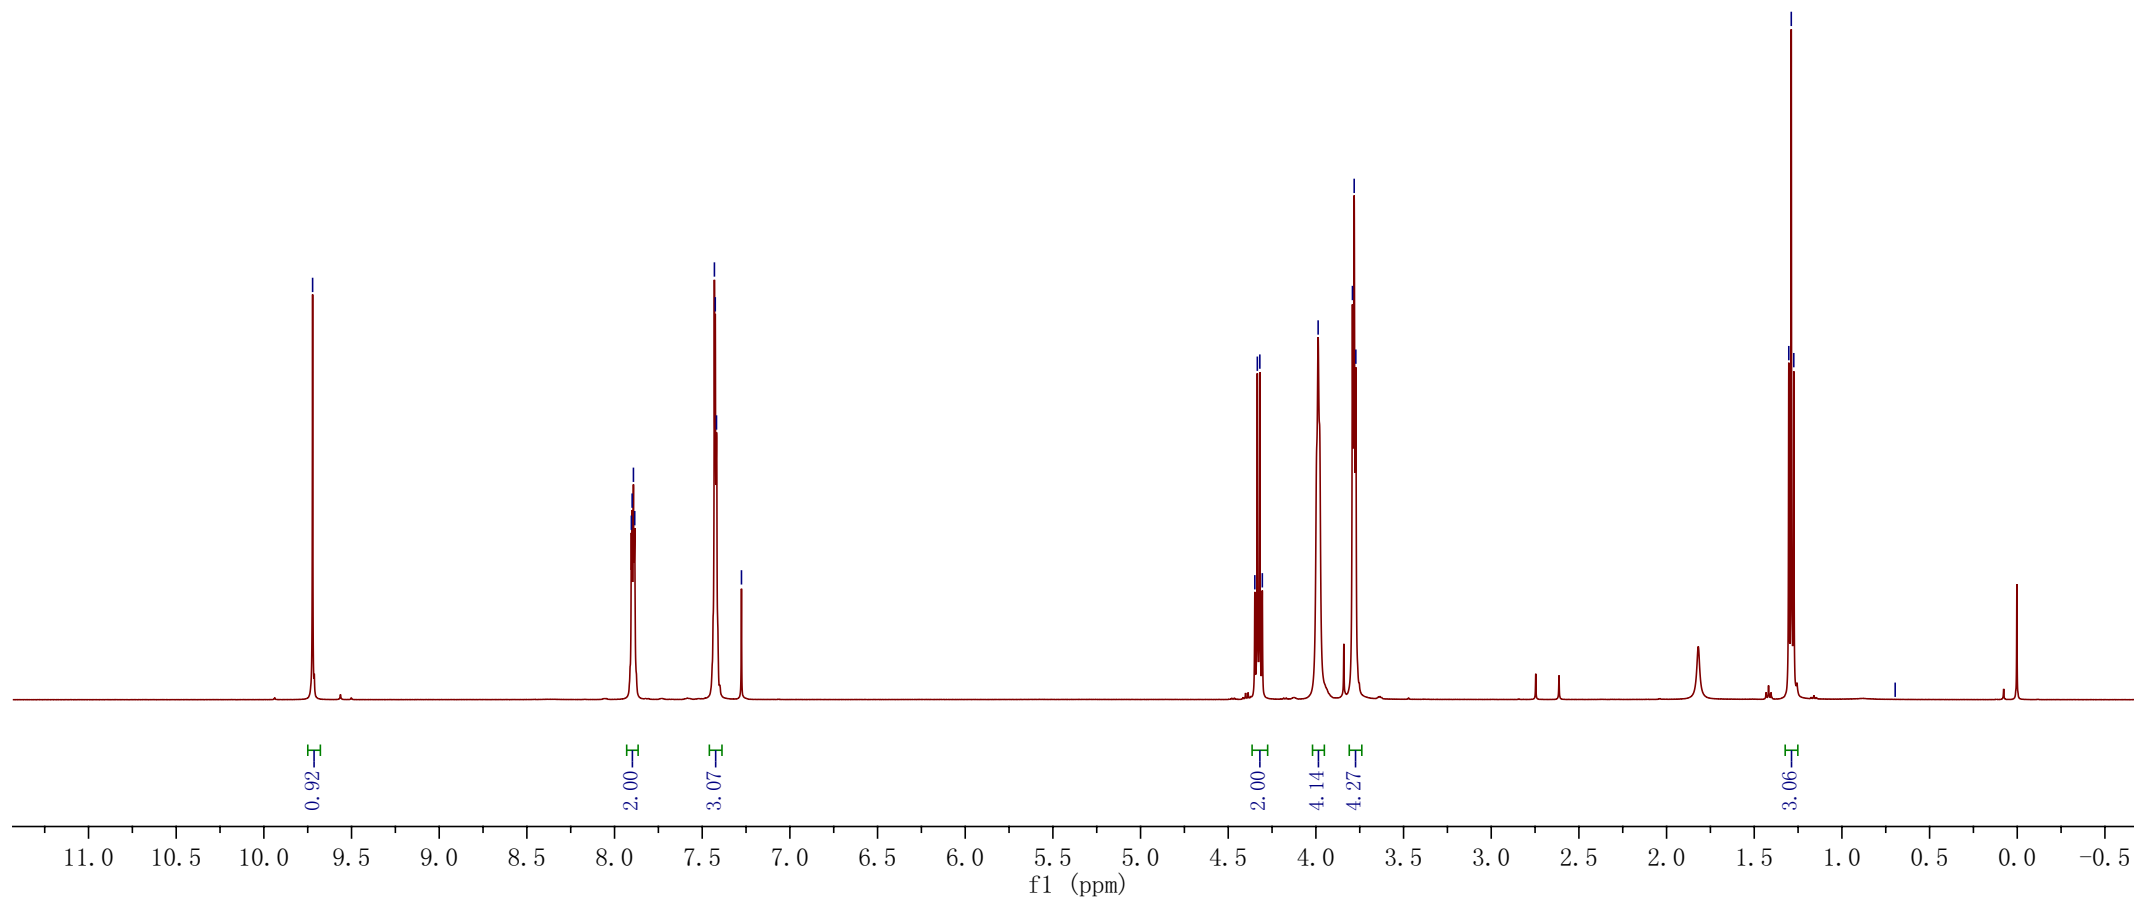

170607  
SC170513B CDC13 0607

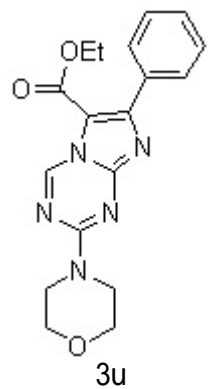

160.2029  
157.8492  
155.1331  
152.3312  
148.3239

132.9469  
130.3750  
129.4362  
127.4899

108.3601

77.2871  
77.0330  
76.7788

66.7328  
66.5230

60.7889

44.9492  
44.1769

14.0310

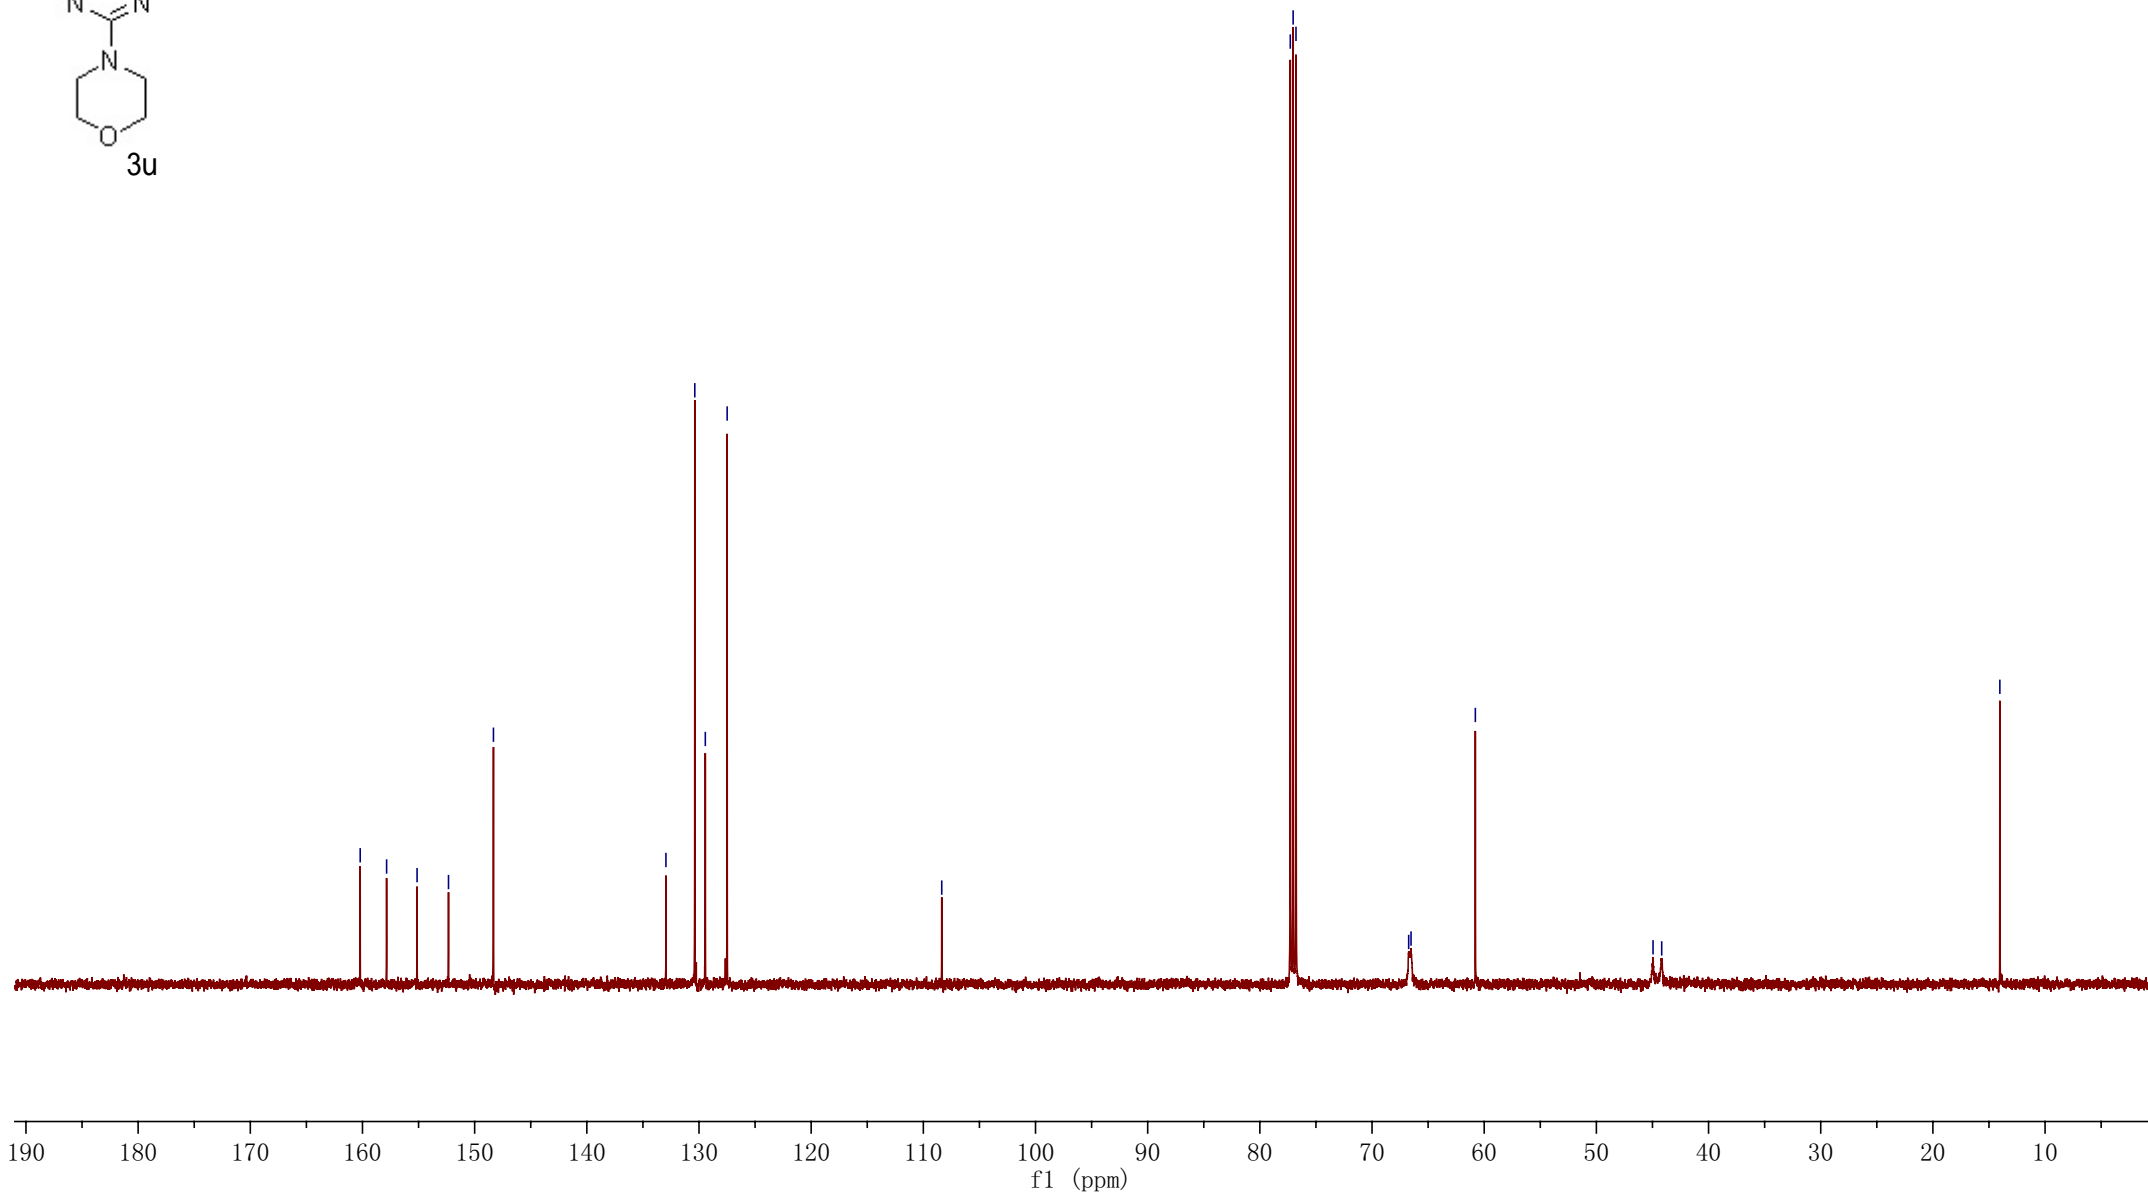

170913  
SC170712B CDC13 0913

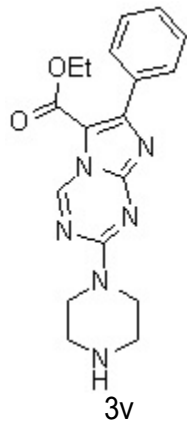

9.7503

8.1470

7.8964

7.8899

7.8817

7.8273

7.4206

7.4180

7.2758

4.3515

4.3372

4.3230

4.3087

4.0441

3.6978

3.6607

3.6505

3.4947

3.4843

3.4742

1.3031

1.2888

1.2745

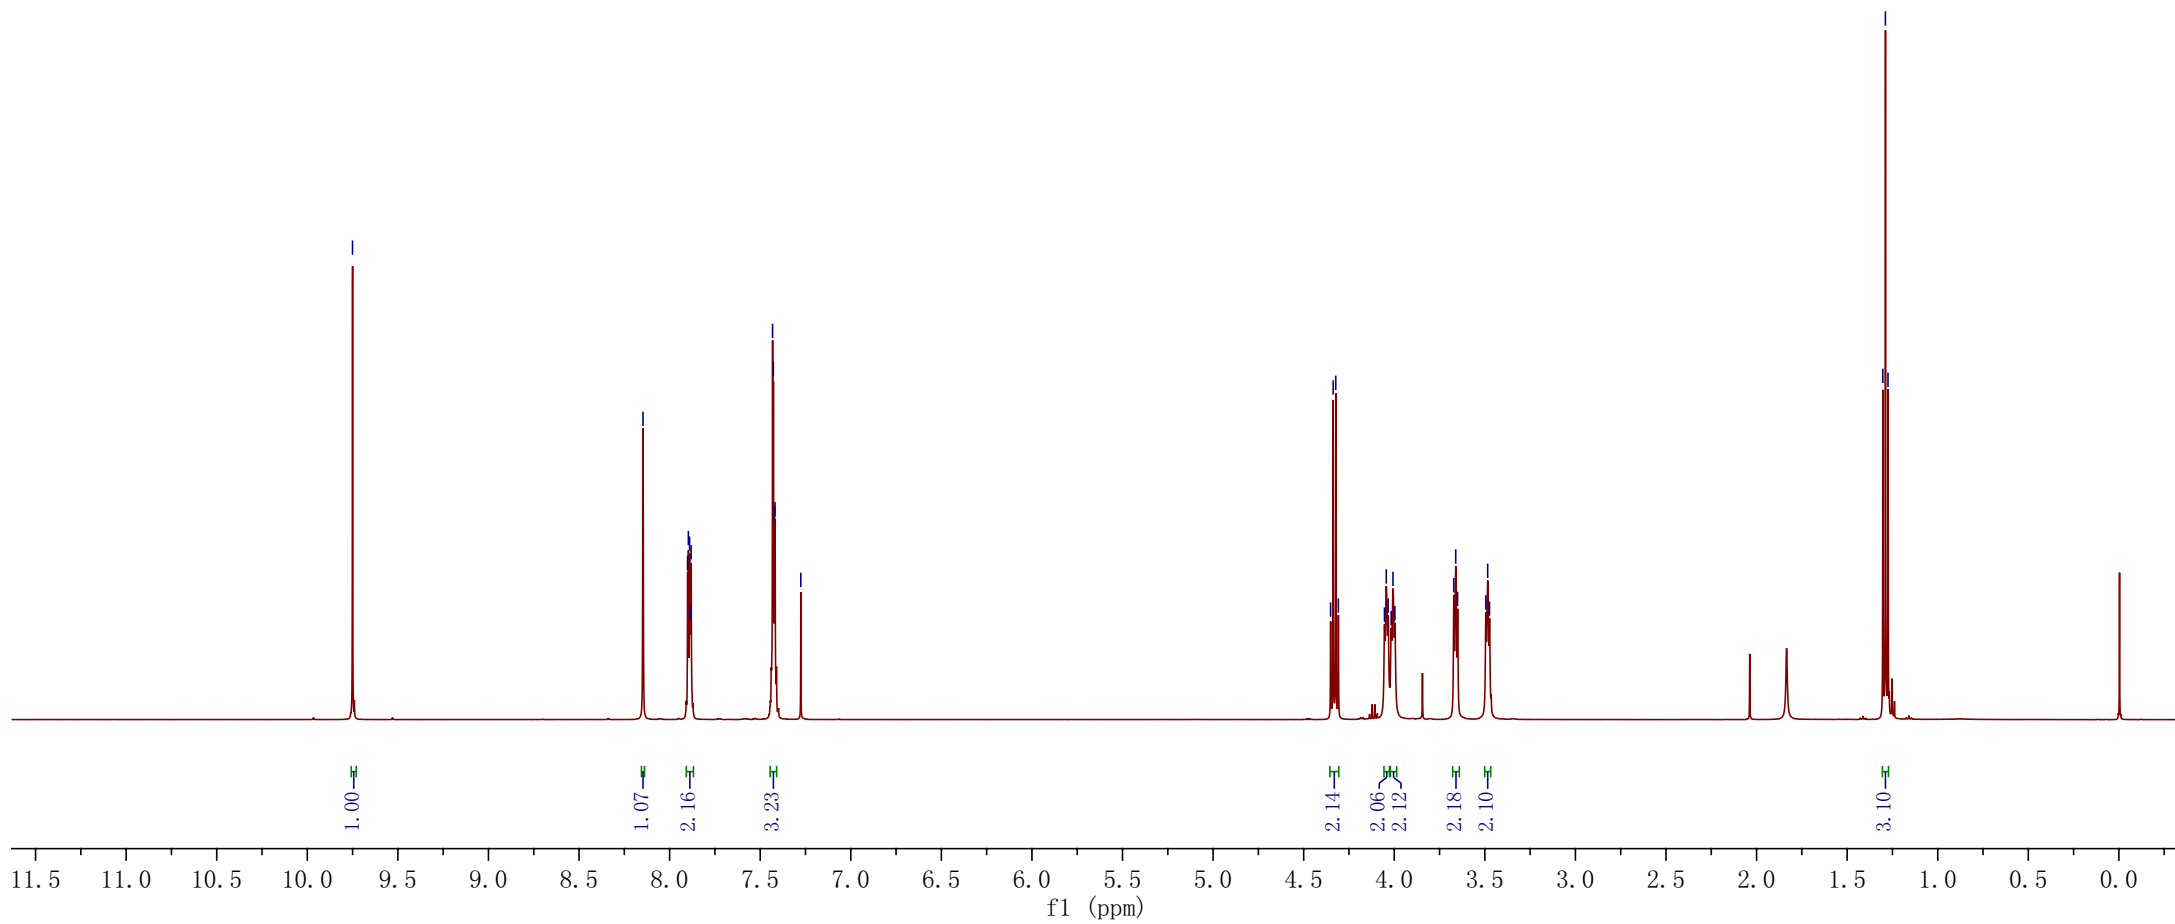

170918  
SC170712B CDC13 0918

160.94  
160.19  
157.80  
155.15  
152.08  
148.57

132.83  
130.39  
129.56  
127.55

108.54

77.34  
77.08  
76.83

60.91

45.21  
44.45  
39.86  
39.28

14.04

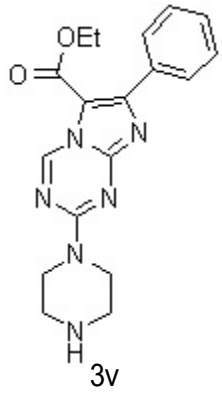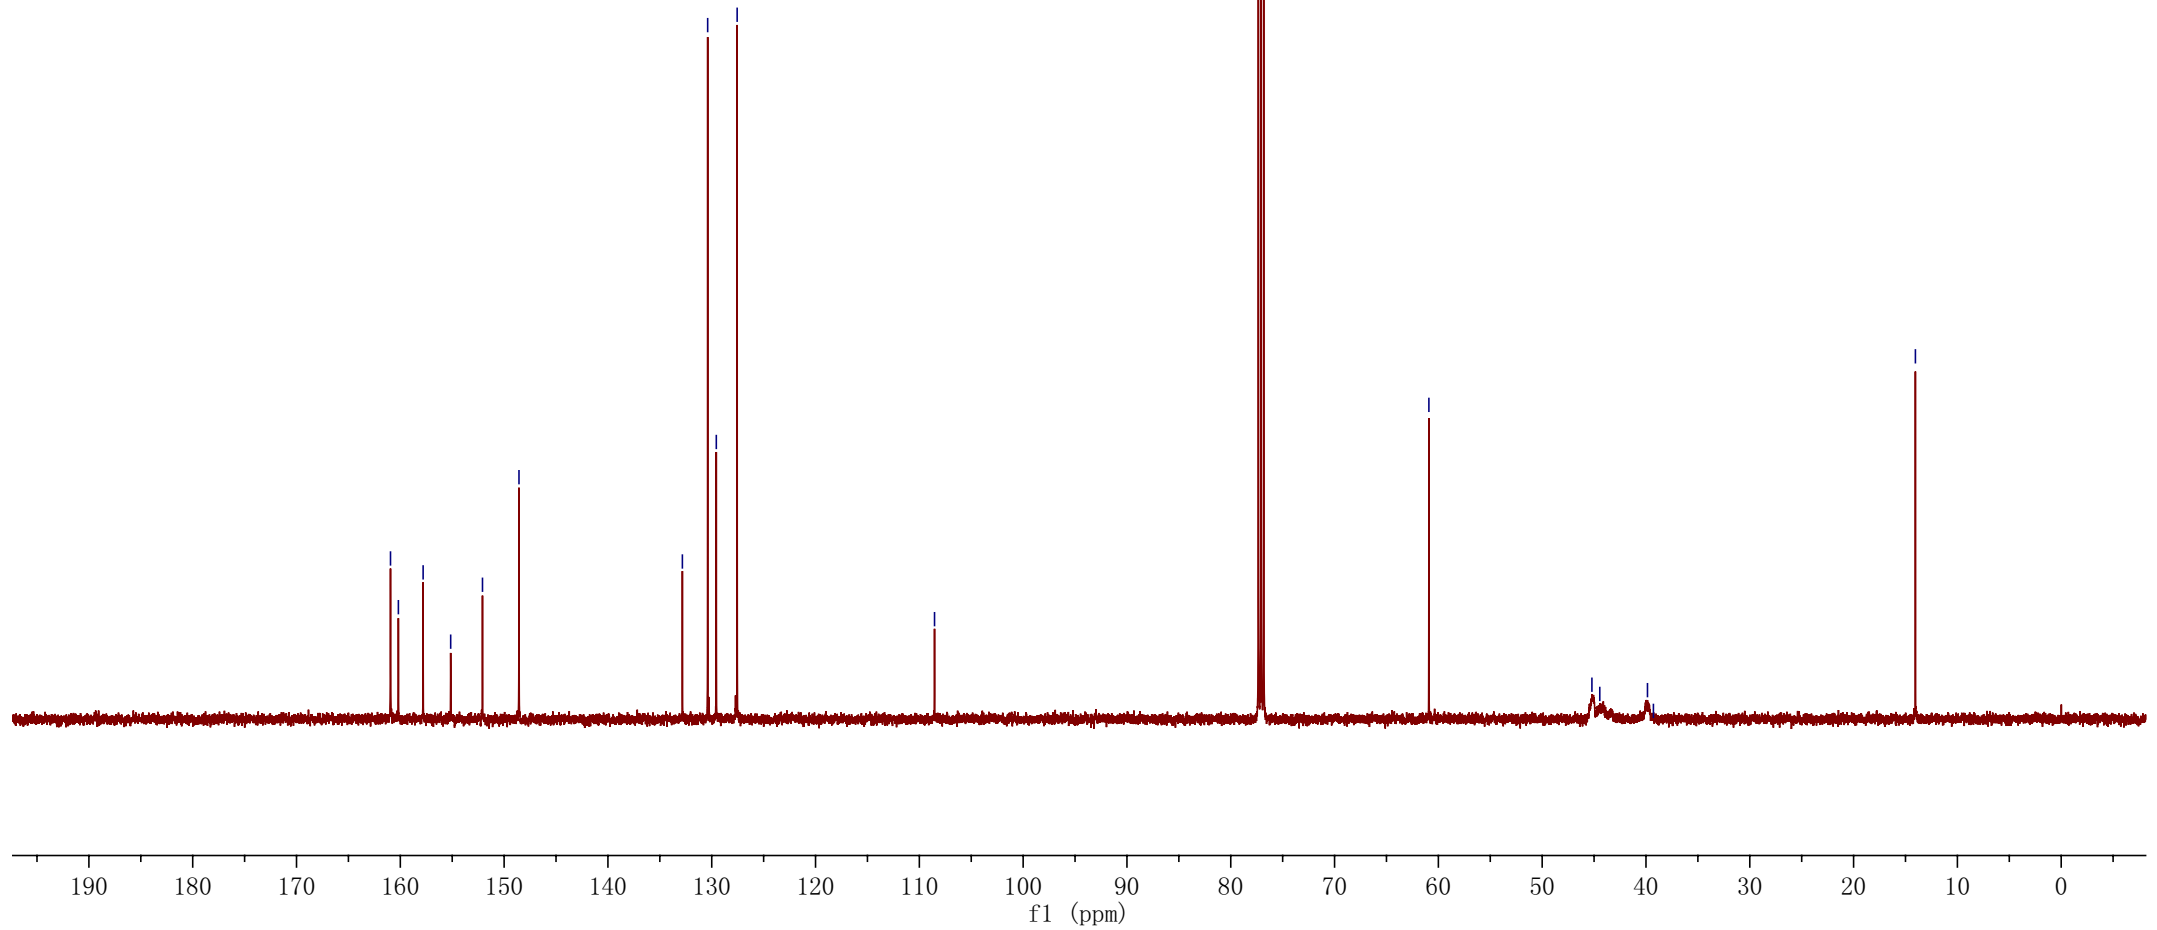

170913  
SC170704A CDC13

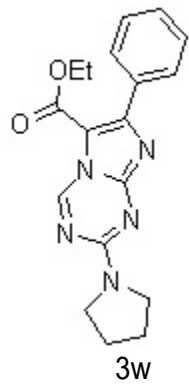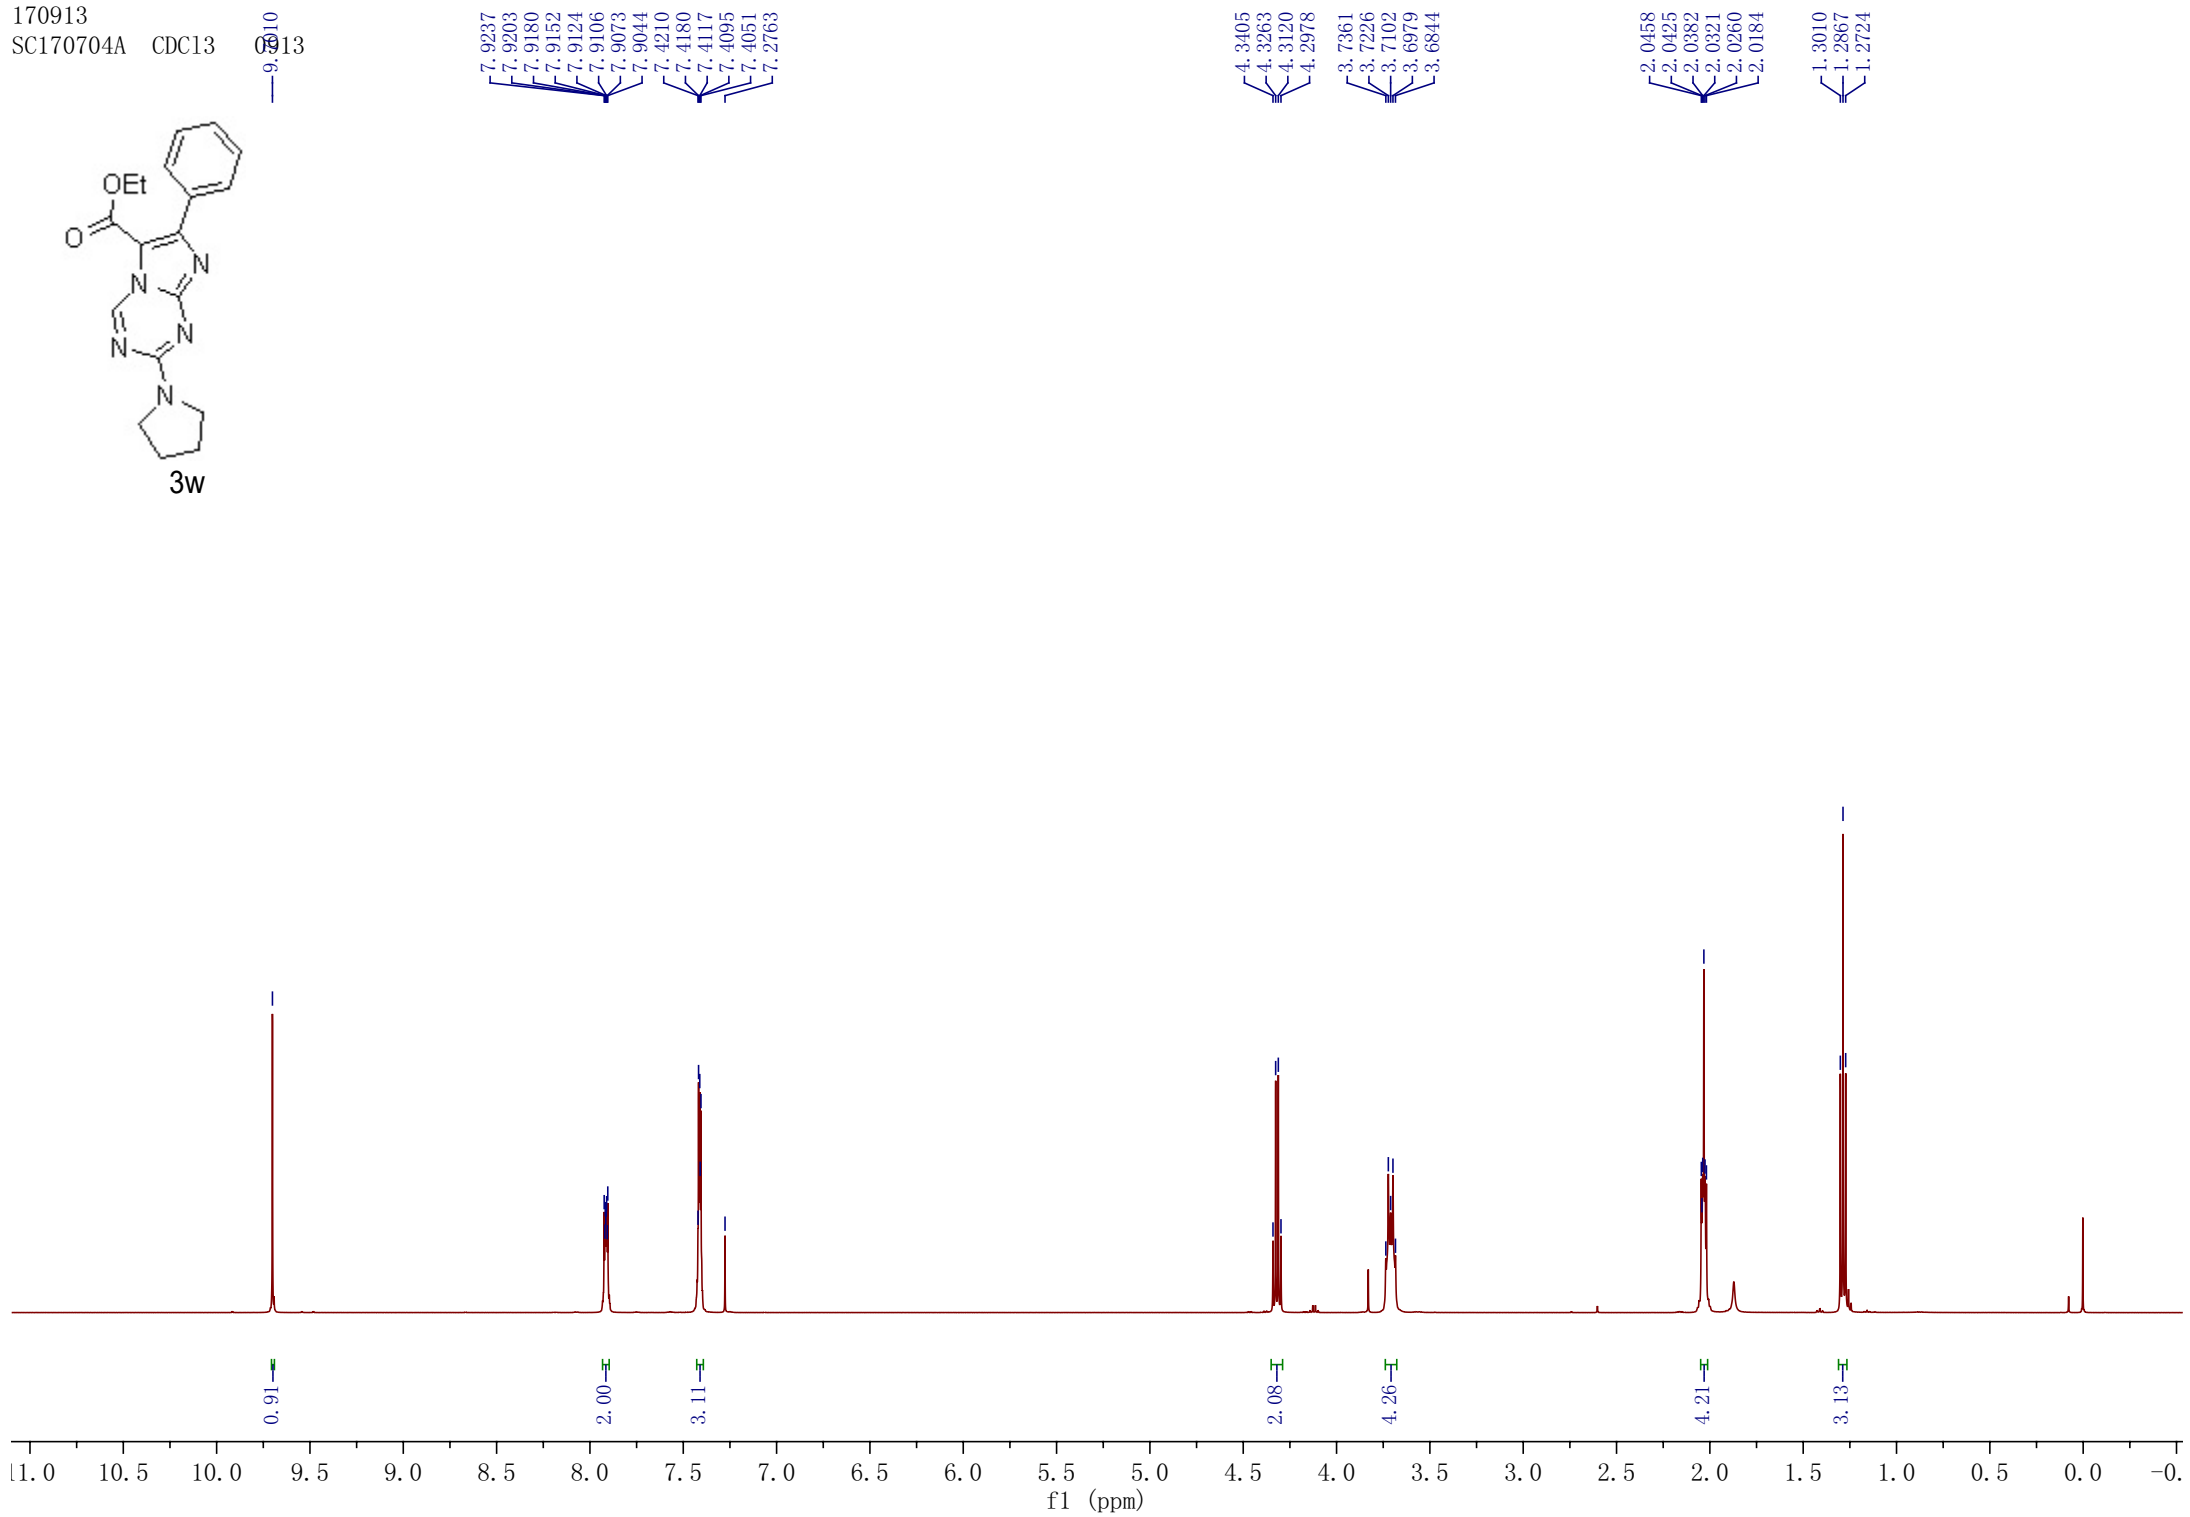

170918  
SC170704A CDC13 0918

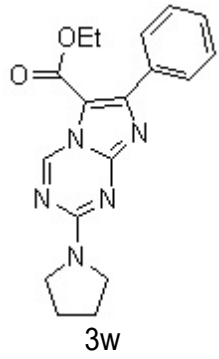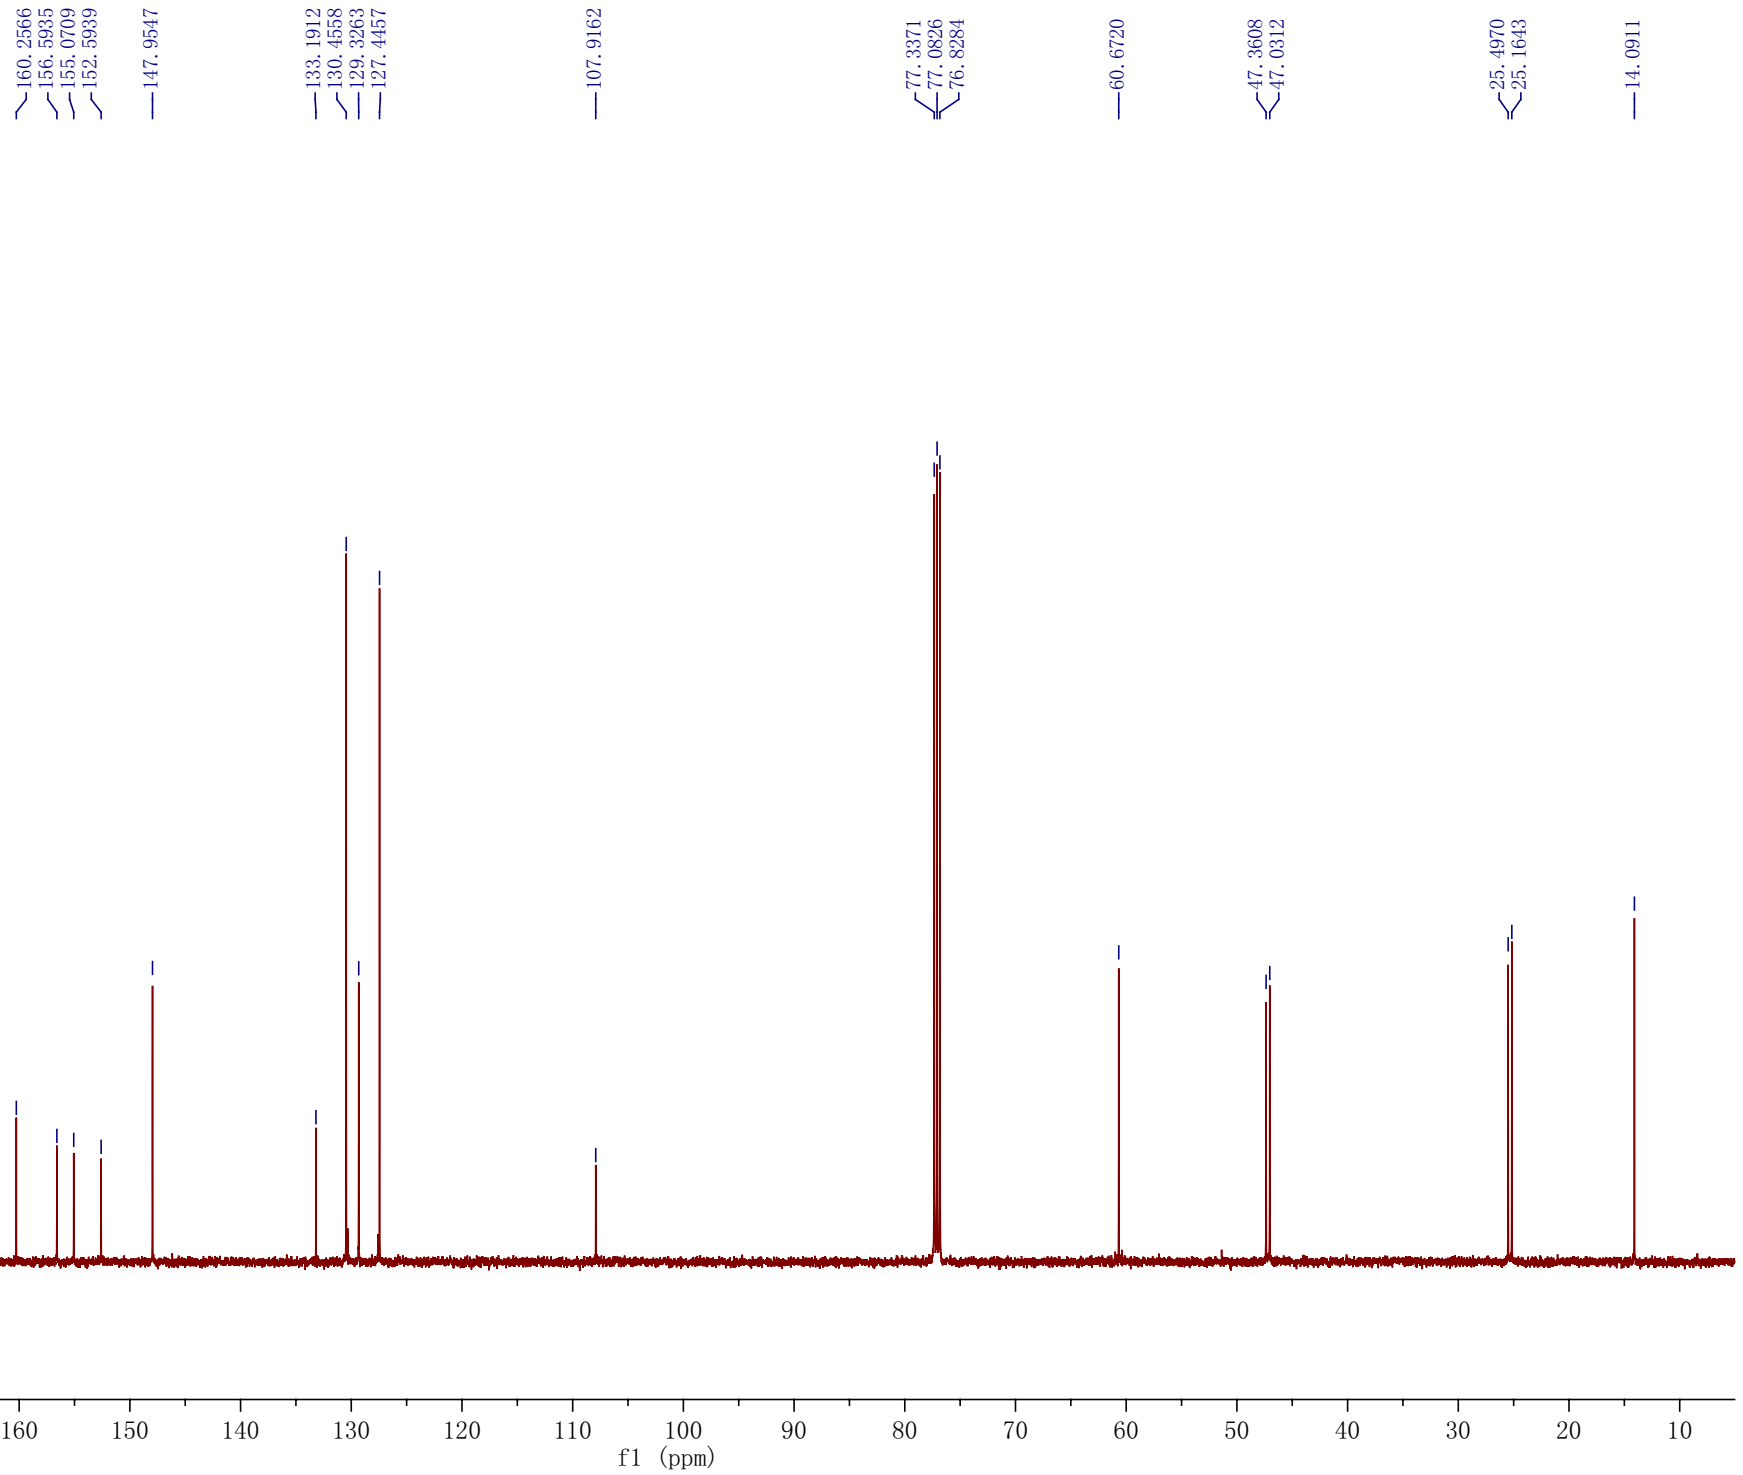



171011  
SC170921B CDC13 1011

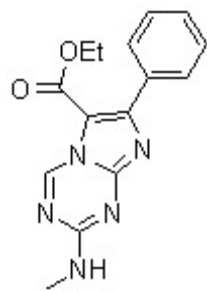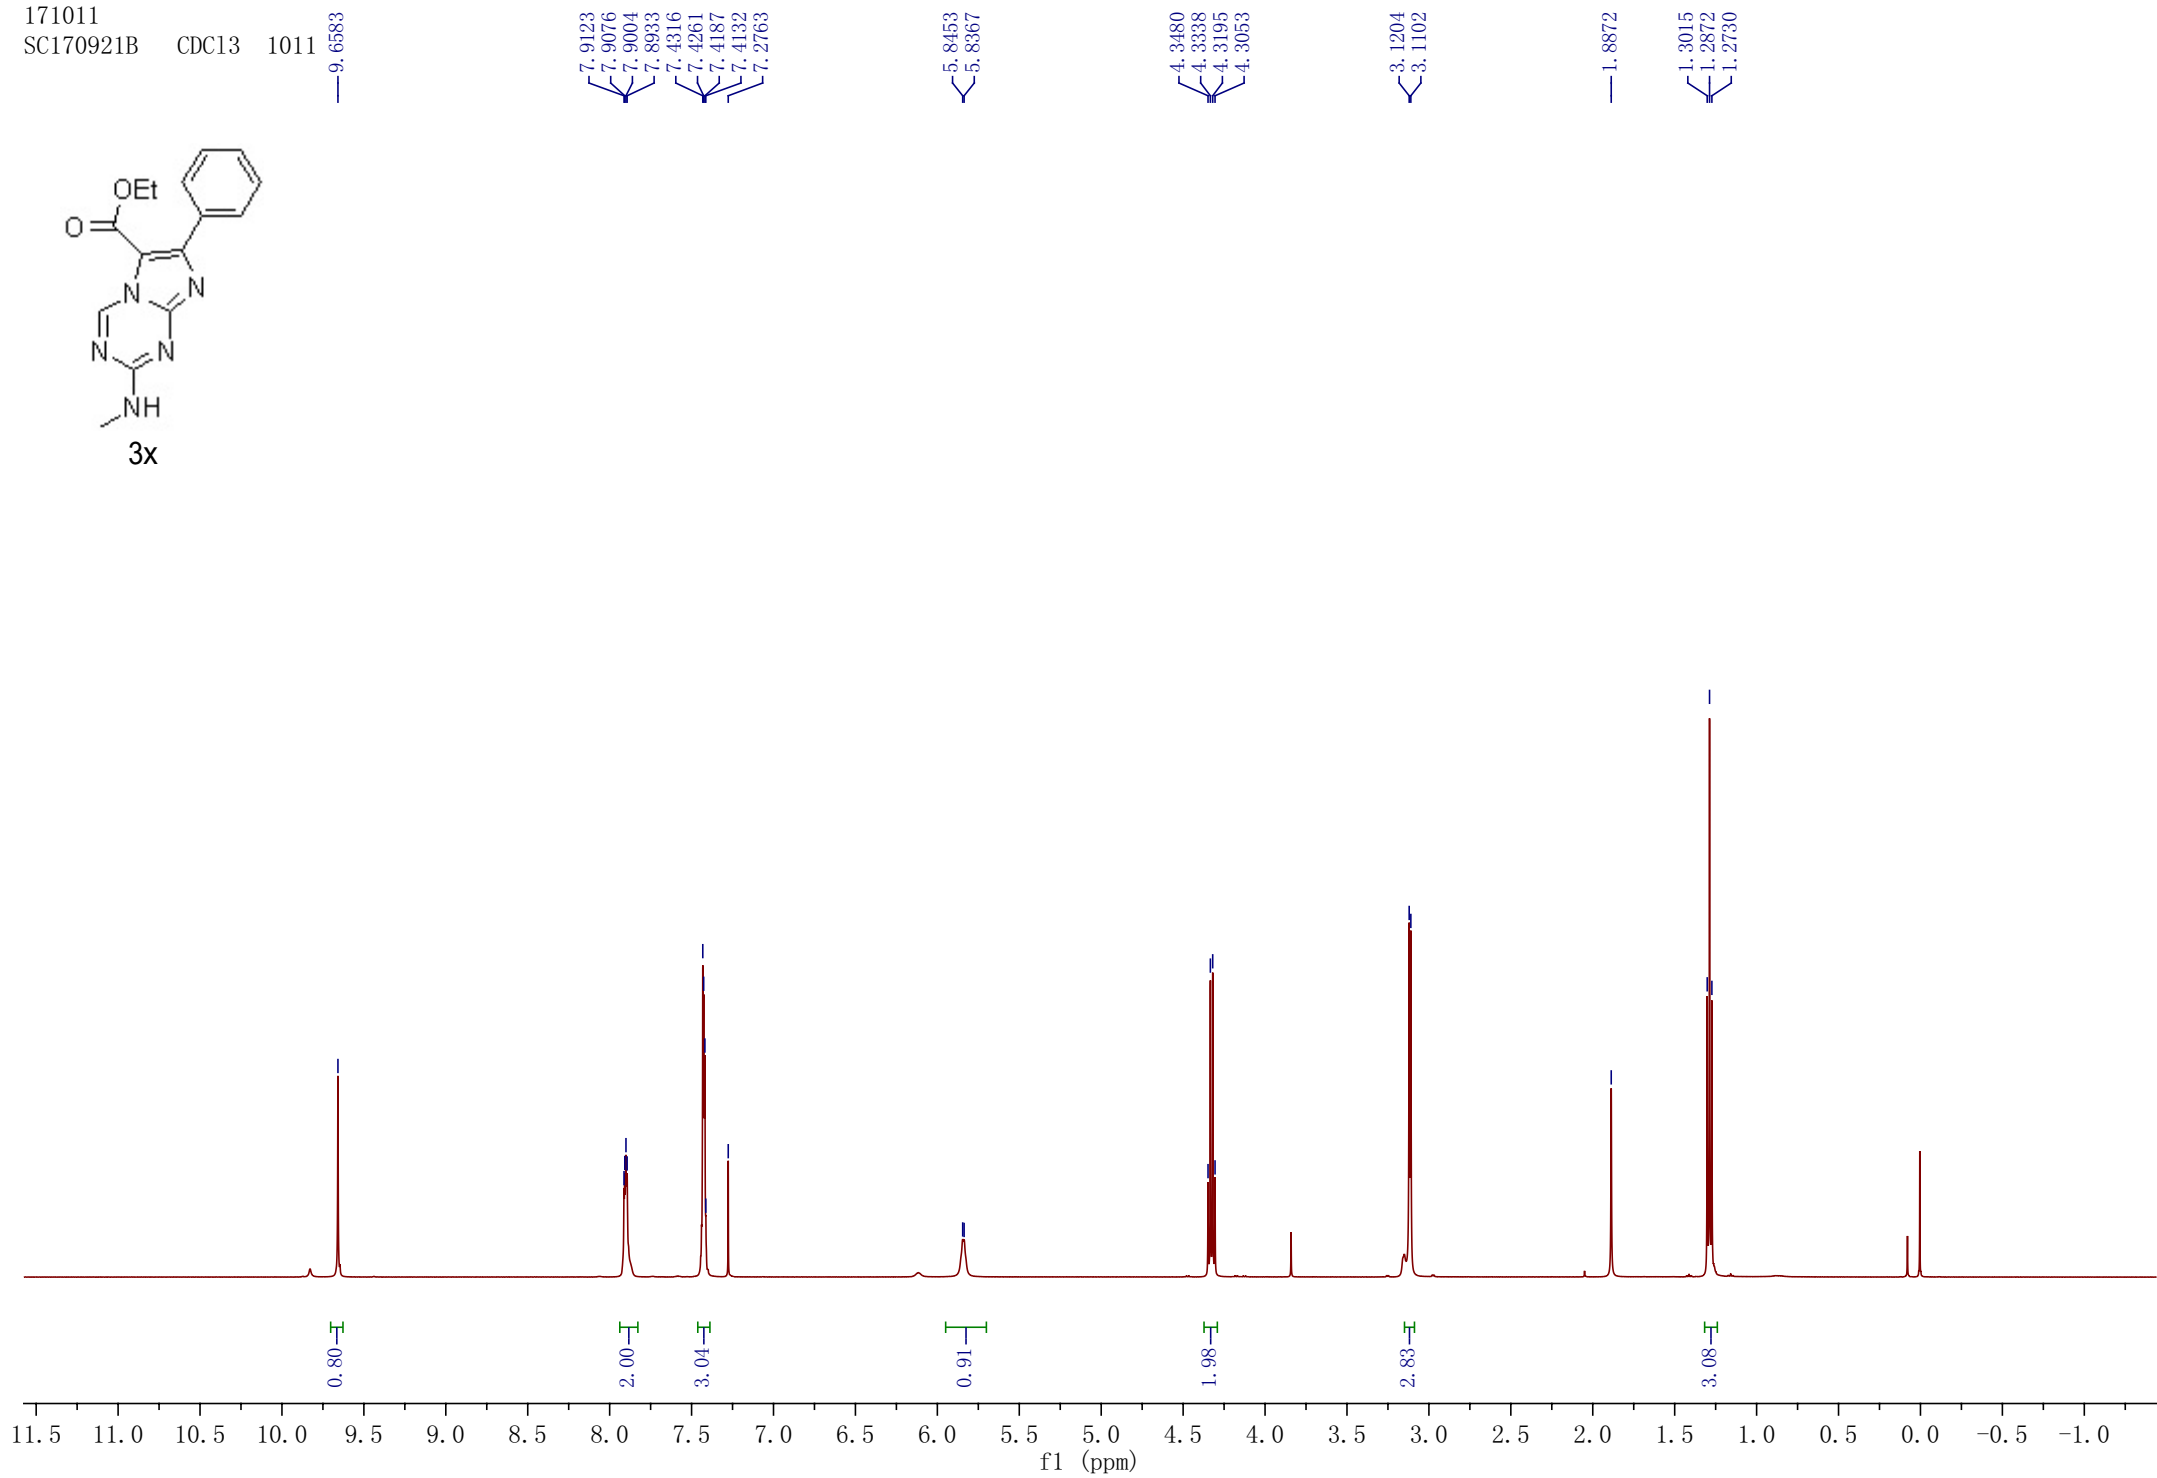

171013  
sc170921B CDC13 1013

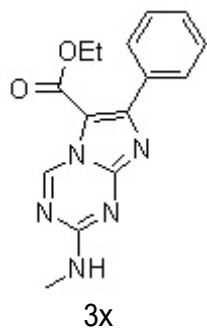

160.2848  
159.5144

154.6365  
152.3460  
148.1658

132.9861  
130.4025  
129.3913  
127.4866

108.6747

77.2886  
77.0346  
76.7805

60.8166

28.2893

14.0305

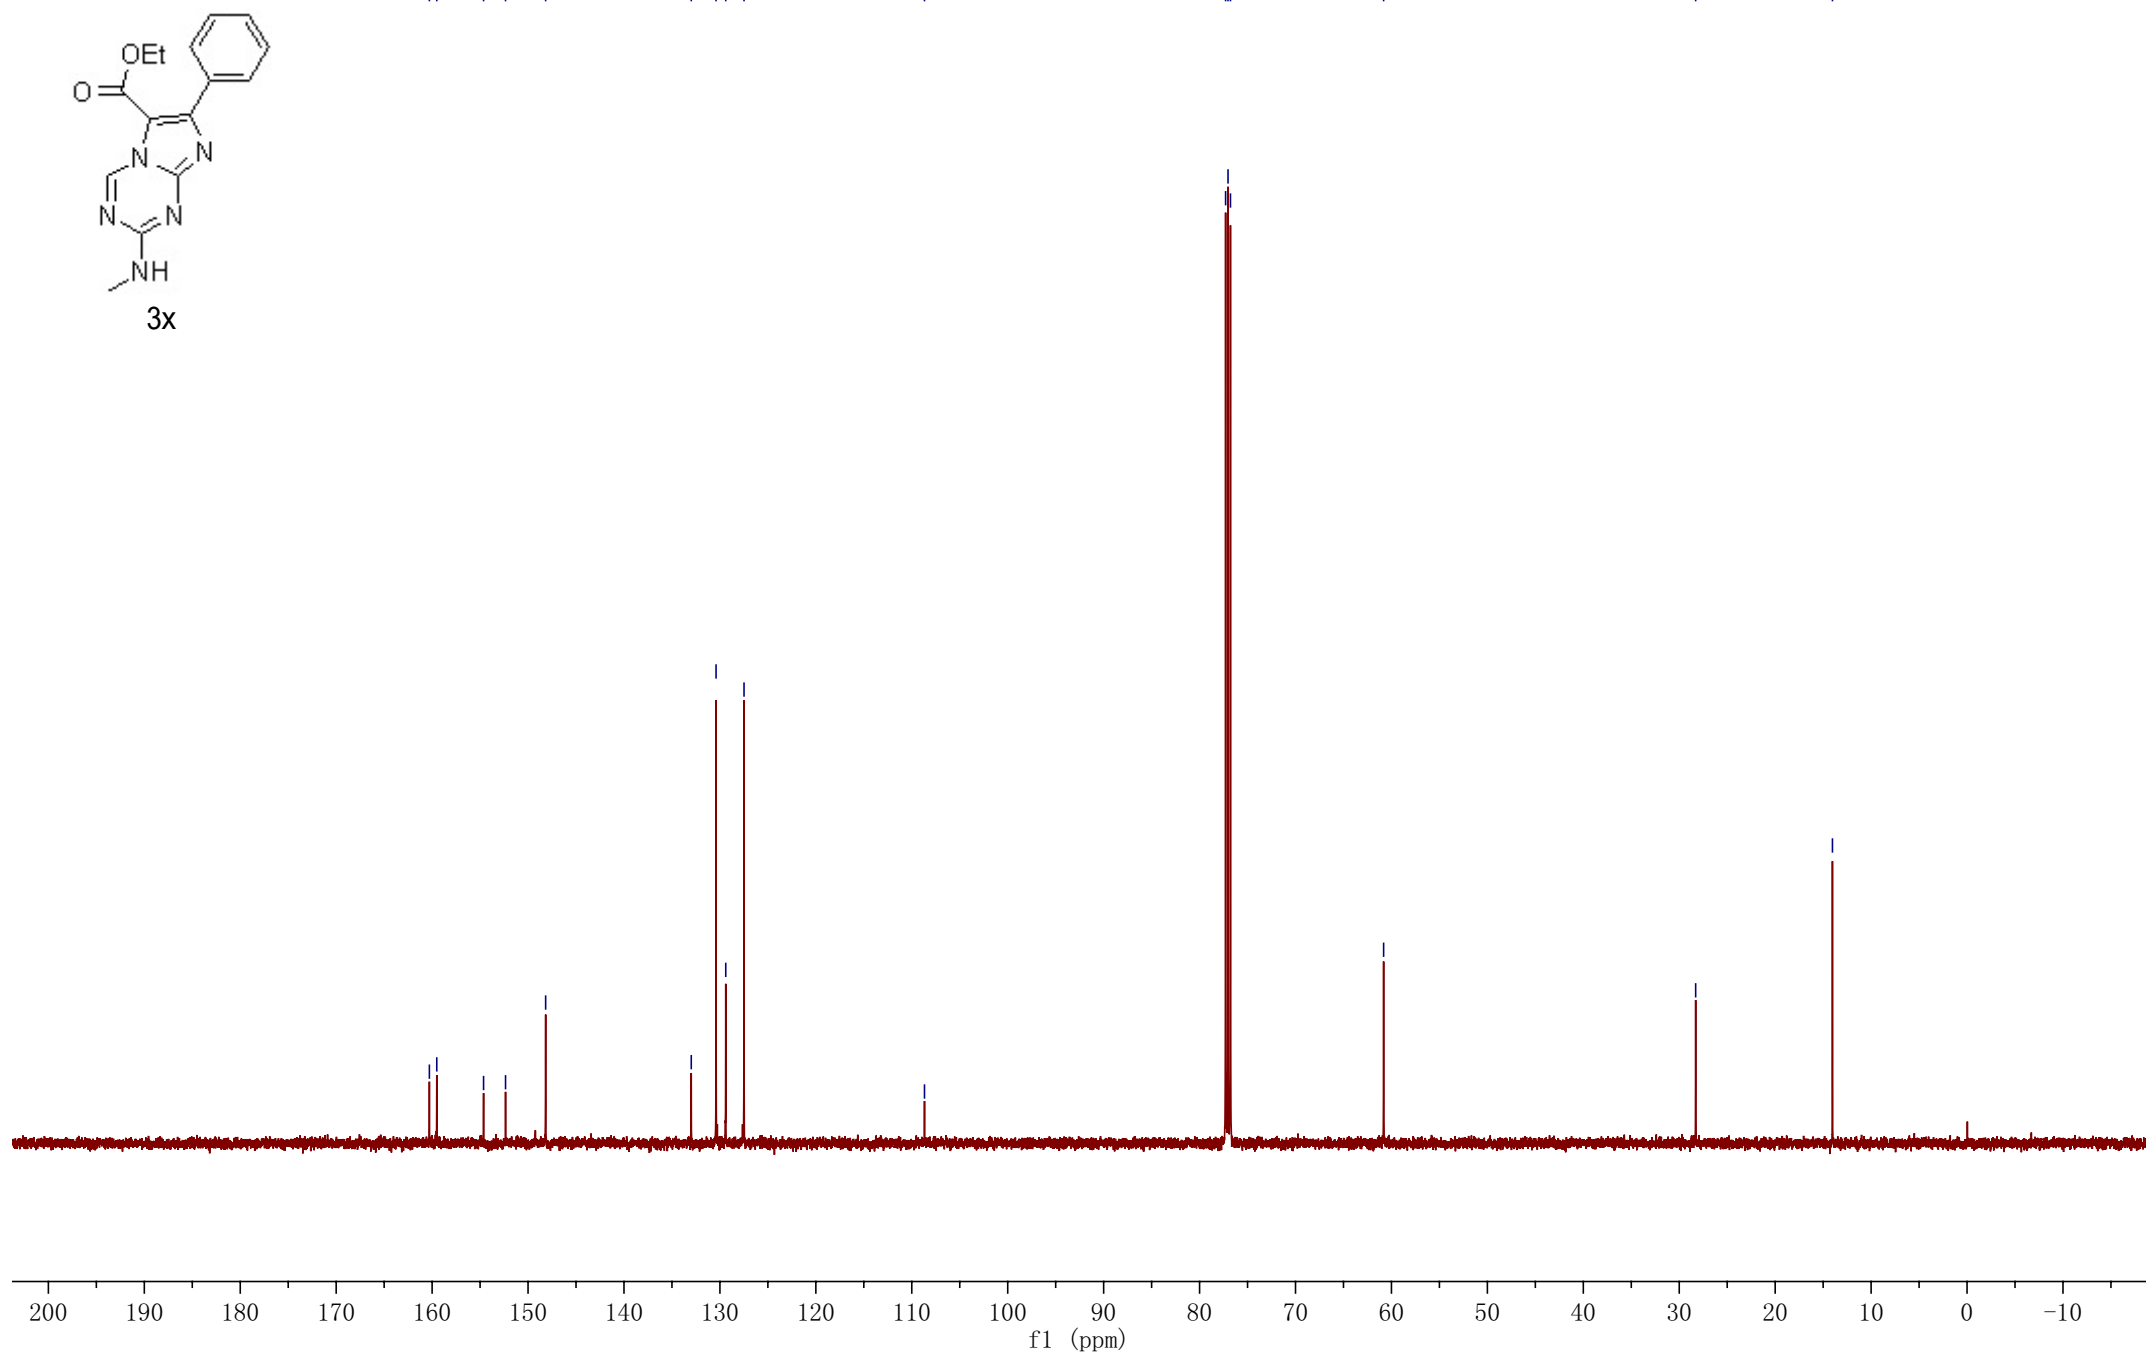

171031  
SC171013 CDC13 1030

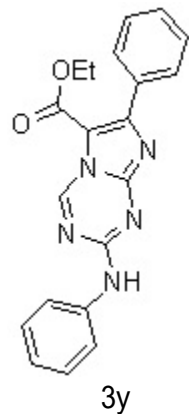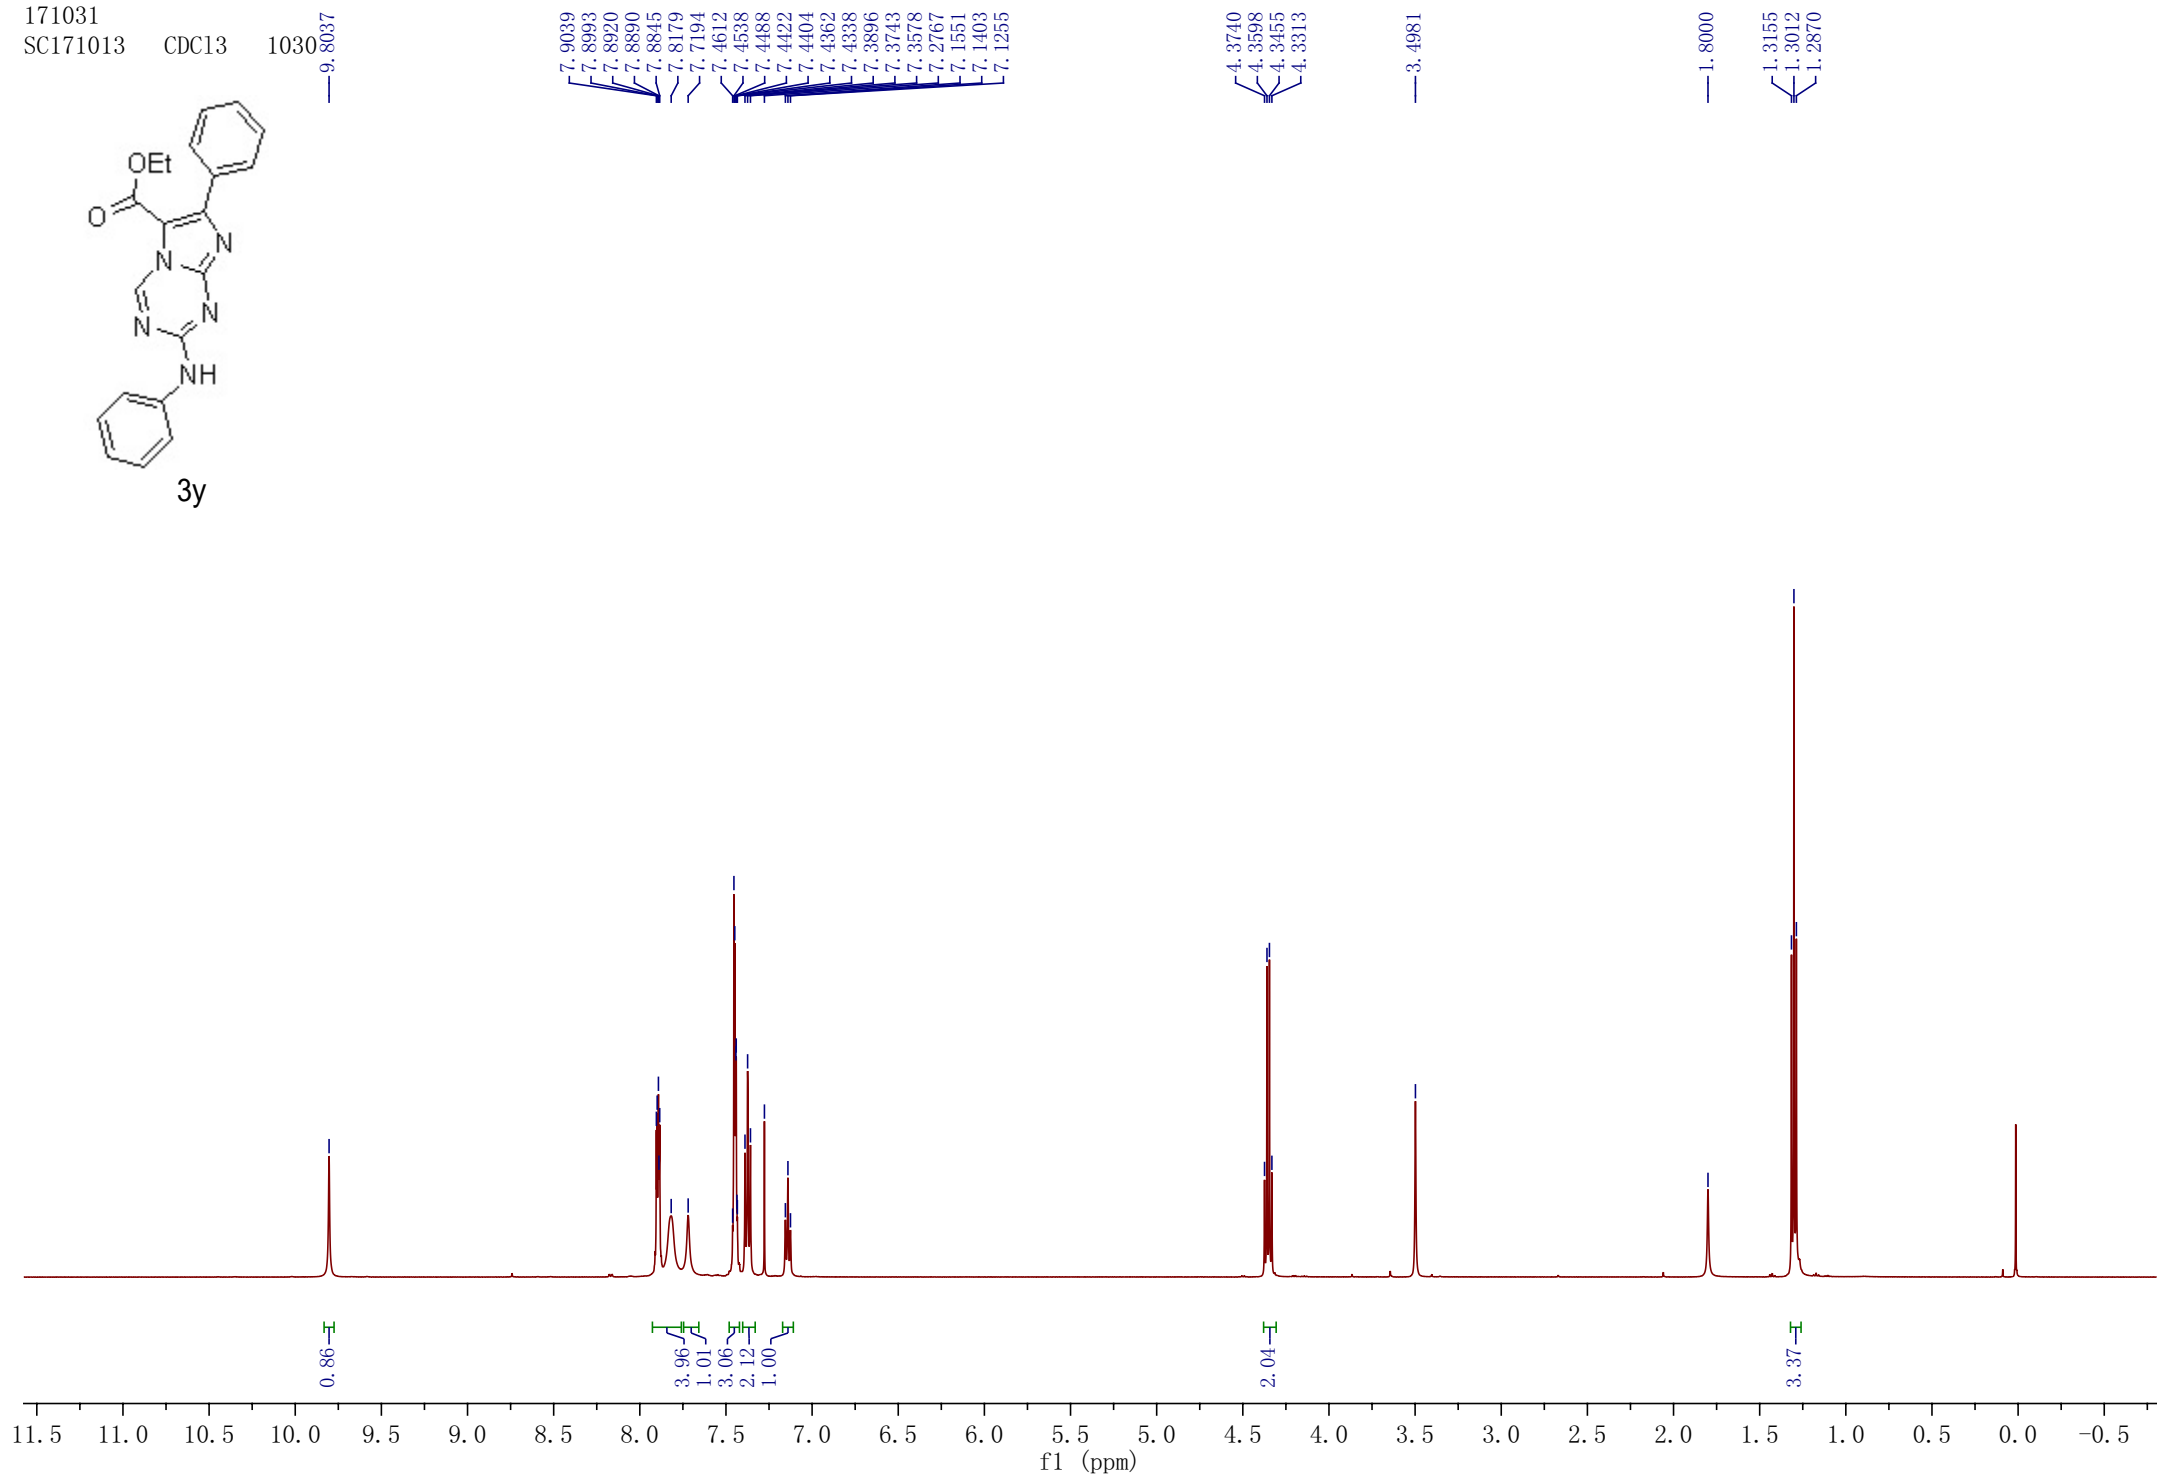

171101  
SC171013 CDC13 1101

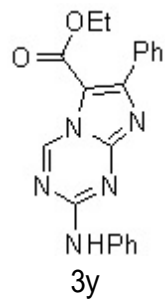

160.20  
156.35  
154.99  
151.29  
148.52

137.53  
132.81  
130.42  
129.54  
129.07  
127.58  
124.20  
119.93

109.16

77.29  
77.03  
76.78

61.02

14.03

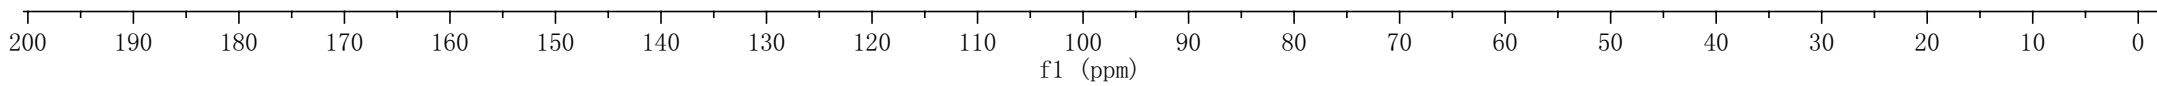

170928  
SC170706-a CDC13 0928

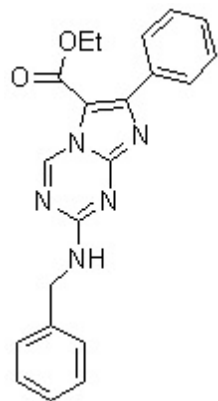

3z

9.6530

7.9098  
7.9056  
7.8984  
7.8914

7.4409  
7.4357  
7.4281  
7.3977  
7.3830  
7.3526  
7.3381  
7.3230  
7.2763  
6.2073  
6.1967

4.7478  
4.7362  
4.3520  
4.3378  
4.3235  
4.3093

1.8506

1.3053  
1.2911  
1.2768

0.0143

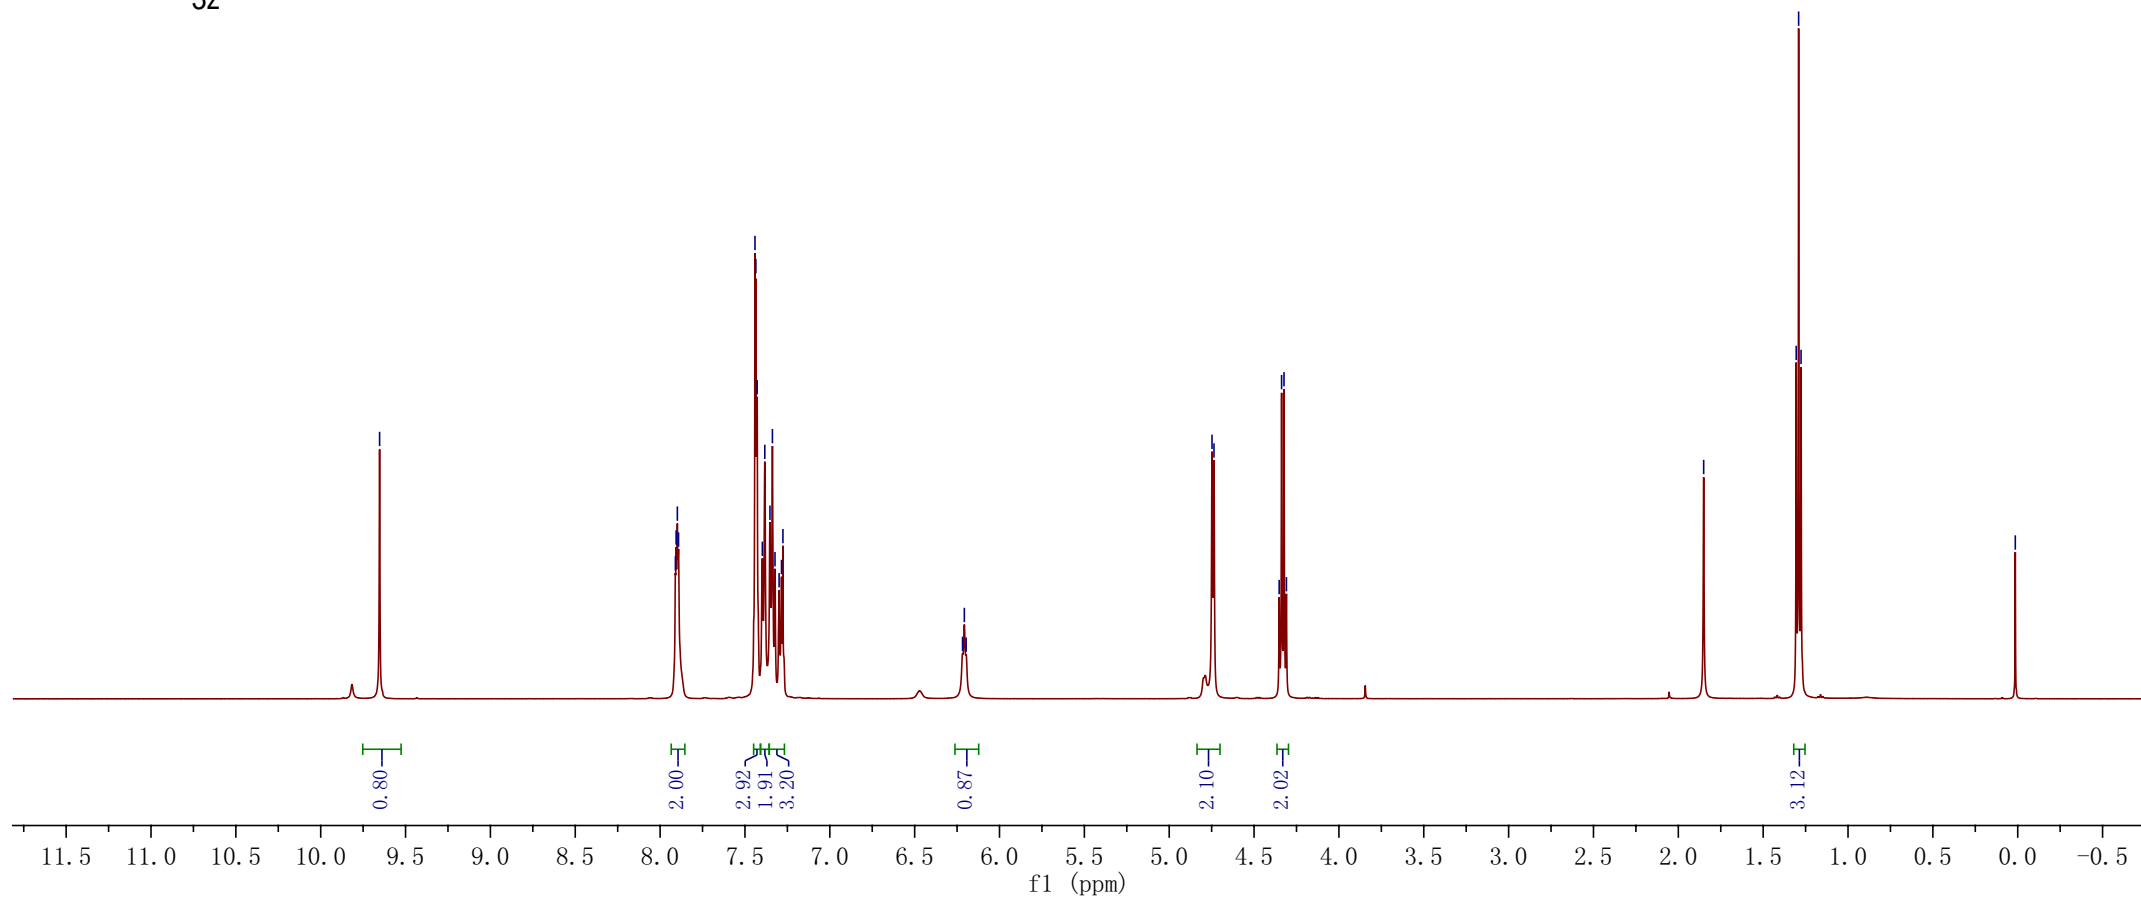

170929  
SC170706-a CDC13 0929

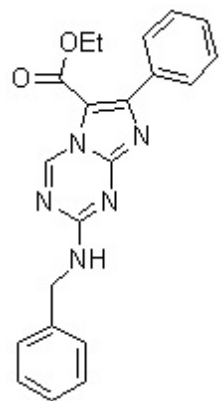

3z

160.2214  
158.7214  
154.6955  
152.1304  
148.4892

137.4631  
132.9433  
130.3958  
129.4289  
128.7278  
127.9862  
127.7114  
127.5147

108.7898

77.2876  
77.0333  
76.7791

60.8438

45.4405

14.0353

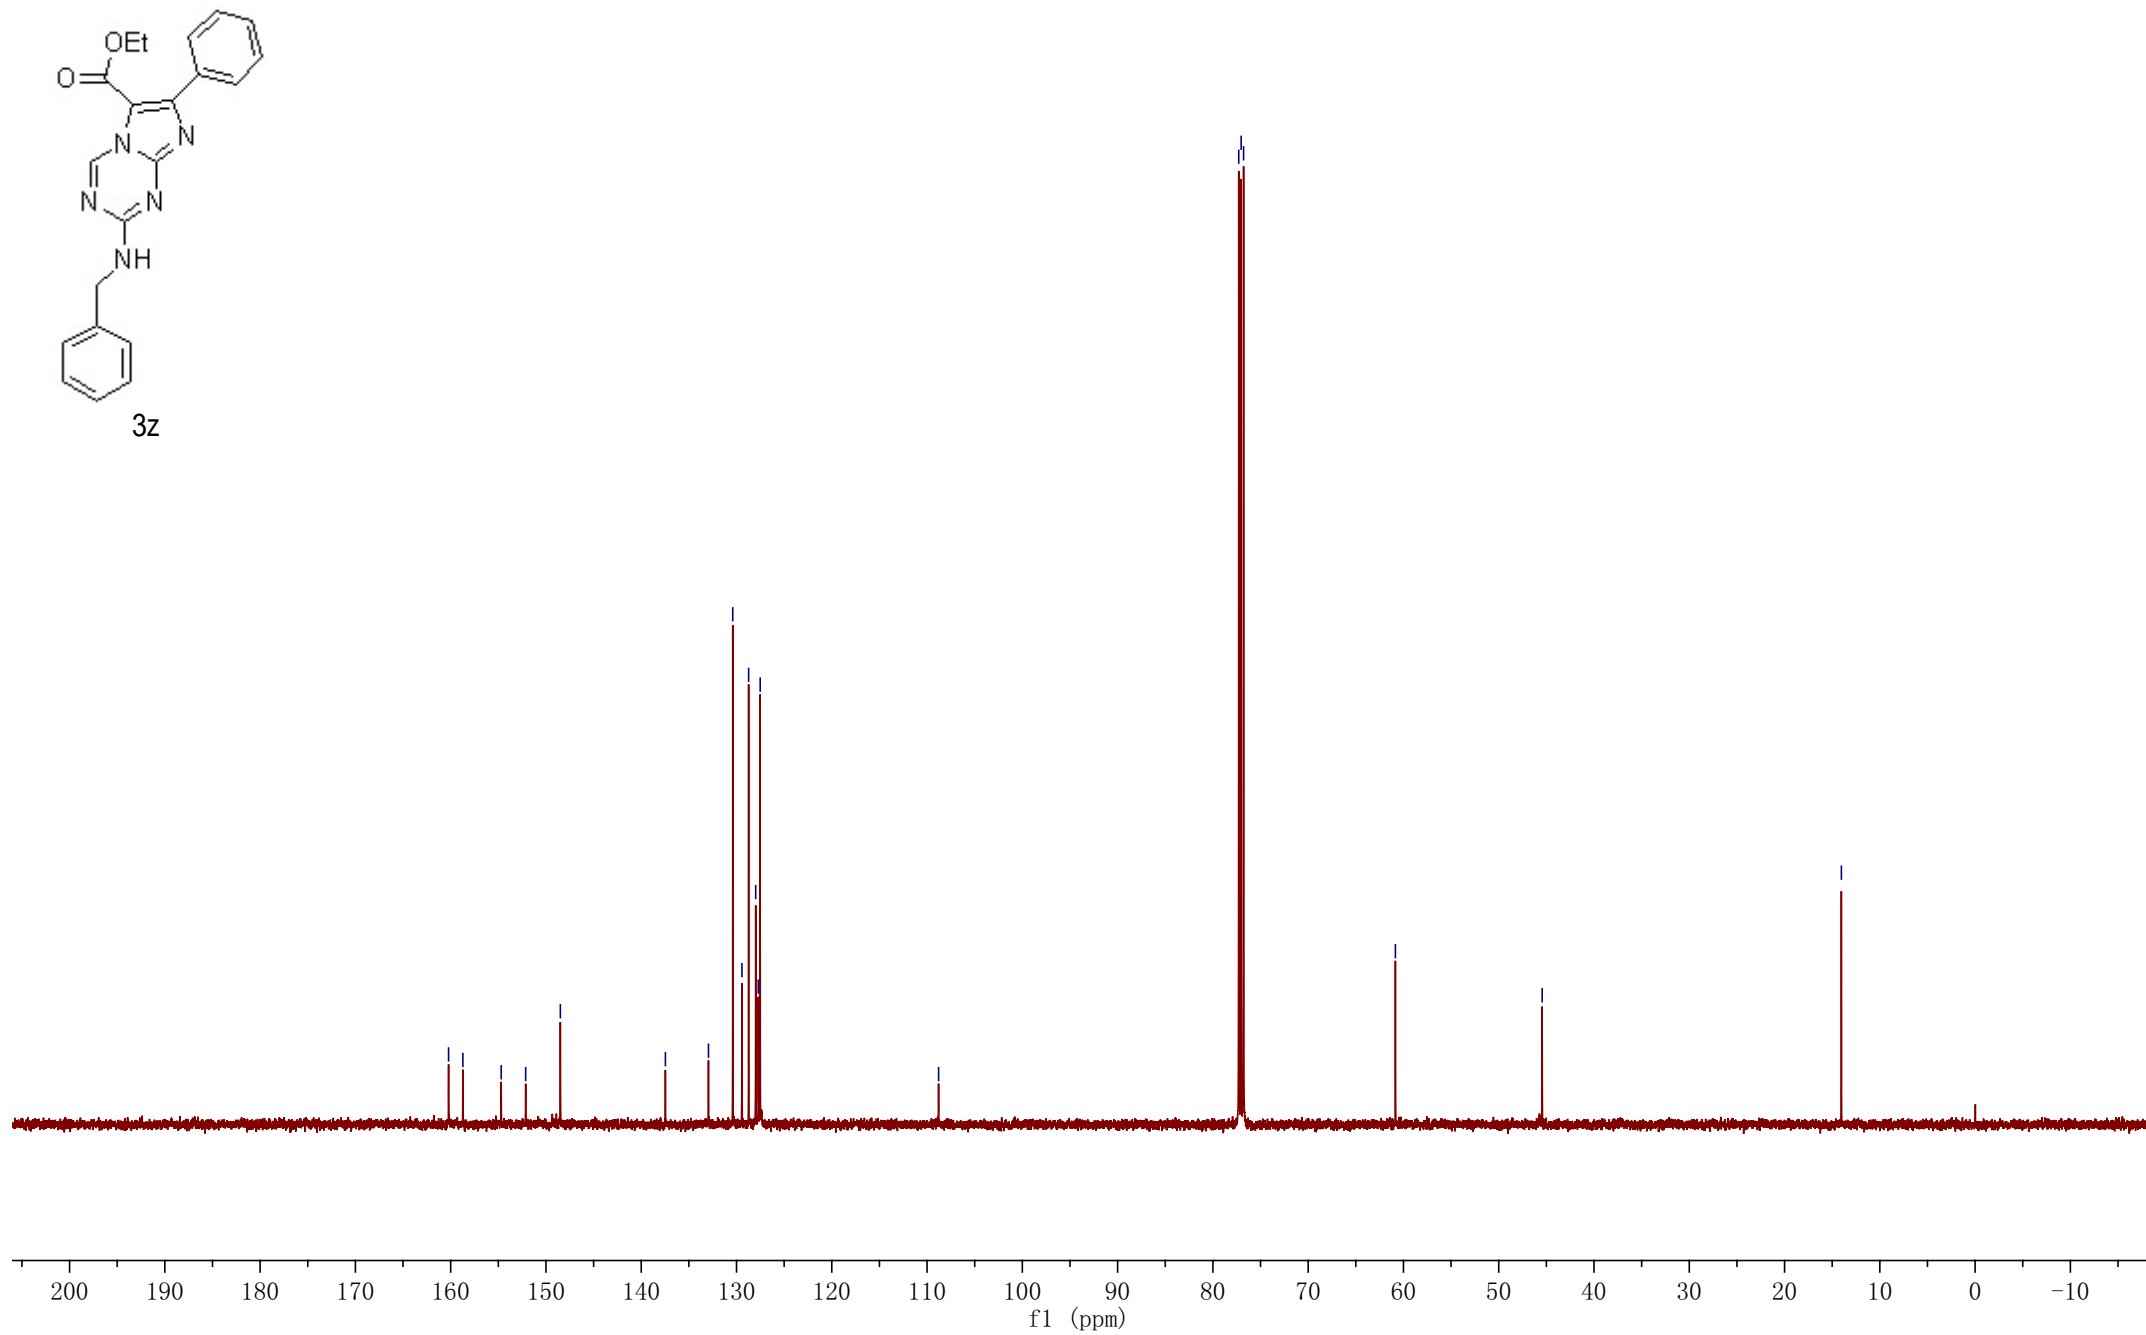

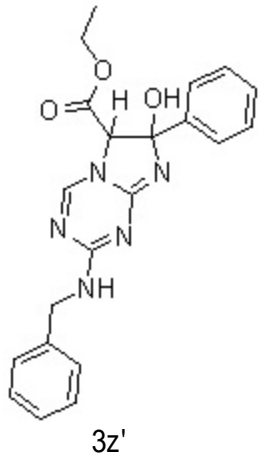

—13.4152

—9.3333

8.6457  
8.6361

8.4699

7.9360  
7.9217

7.4506

7.4365

7.4212

7.4036

7.4007

7.3980

7.3913

7.3864

7.3687

7.3593

7.3126

7.3036

4.6431

4.6319

4.3227

4.3085

4.2942

4.2800

—1.7176

1.3296

1.3154

1.3012

1.2786

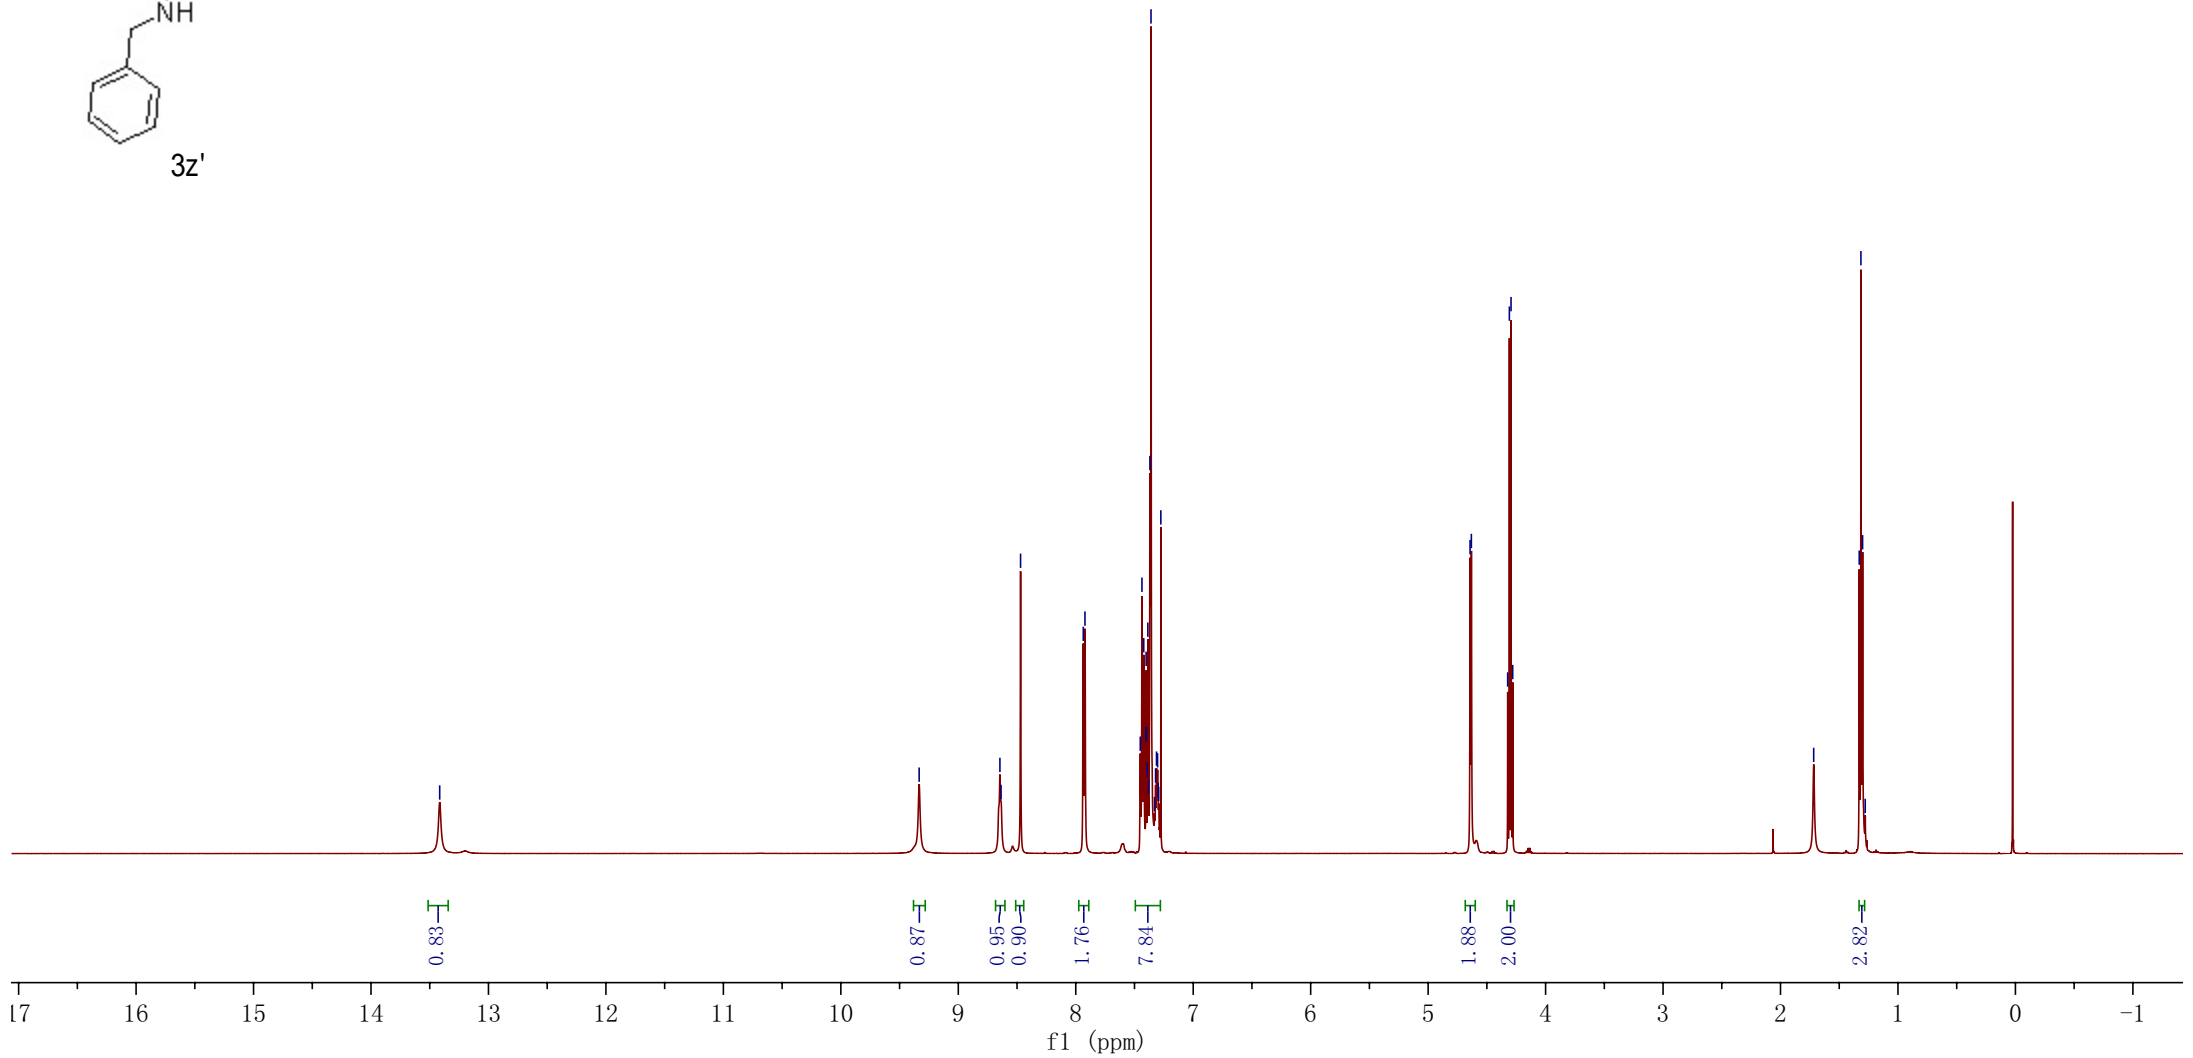

170918  
SC170706-b CDC13 0918

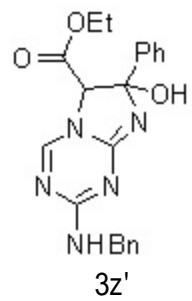

161.62  
160.11

151.36  
150.47

144.80

137.72

133.32

129.23

128.76

128.45

127.82

127.57

113.03

77.33  
77.08  
76.82

60.61

44.89

14.31

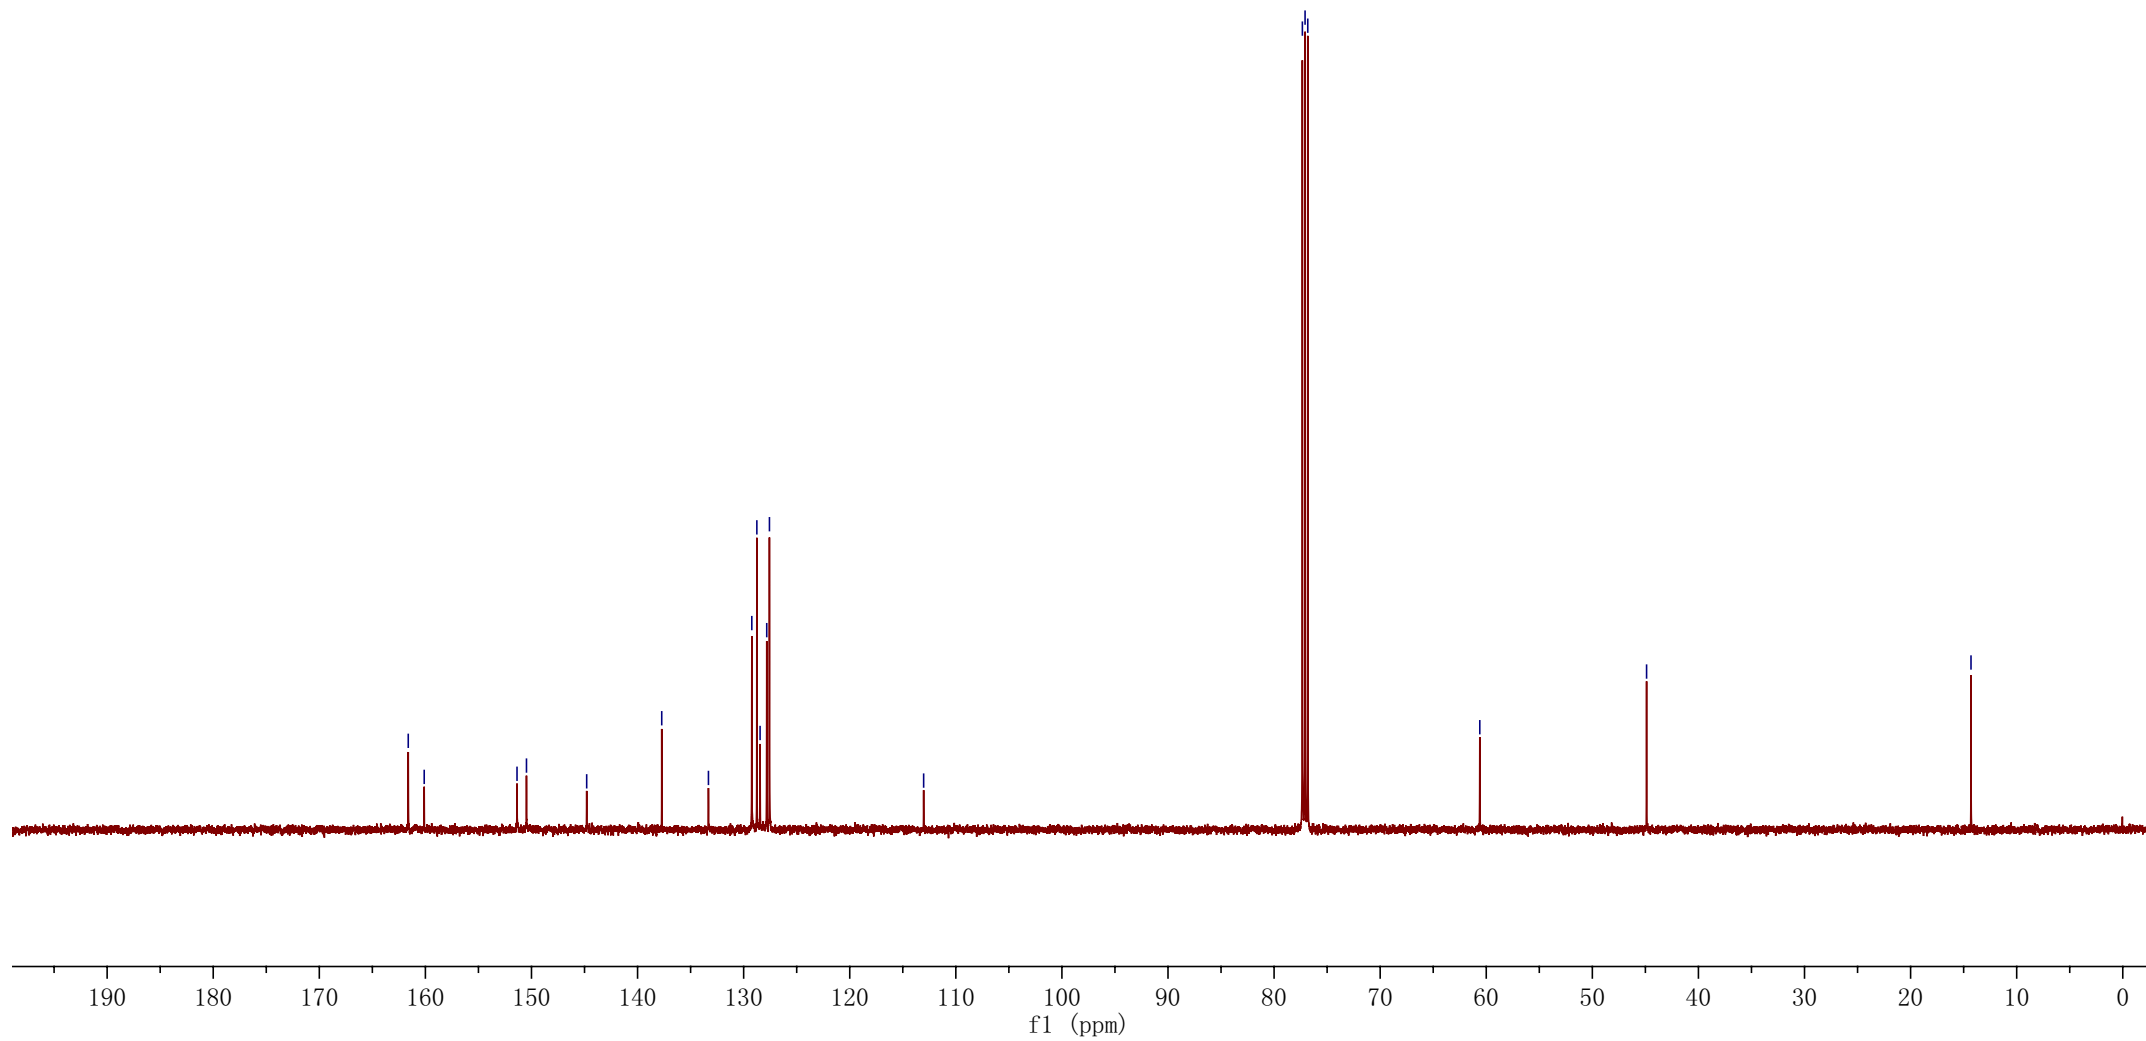



171018  
SC171018-XIU CDC13 1018

8.02  
8.00  
7.64  
7.63  
7.53  
7.52  
7.50

5.67  
5.62

4.32  
4.31  
4.29  
4.28

1.61  
1.28  
1.27  
1.26  
1.26  
1.25  
1.24

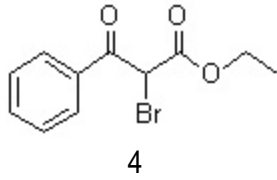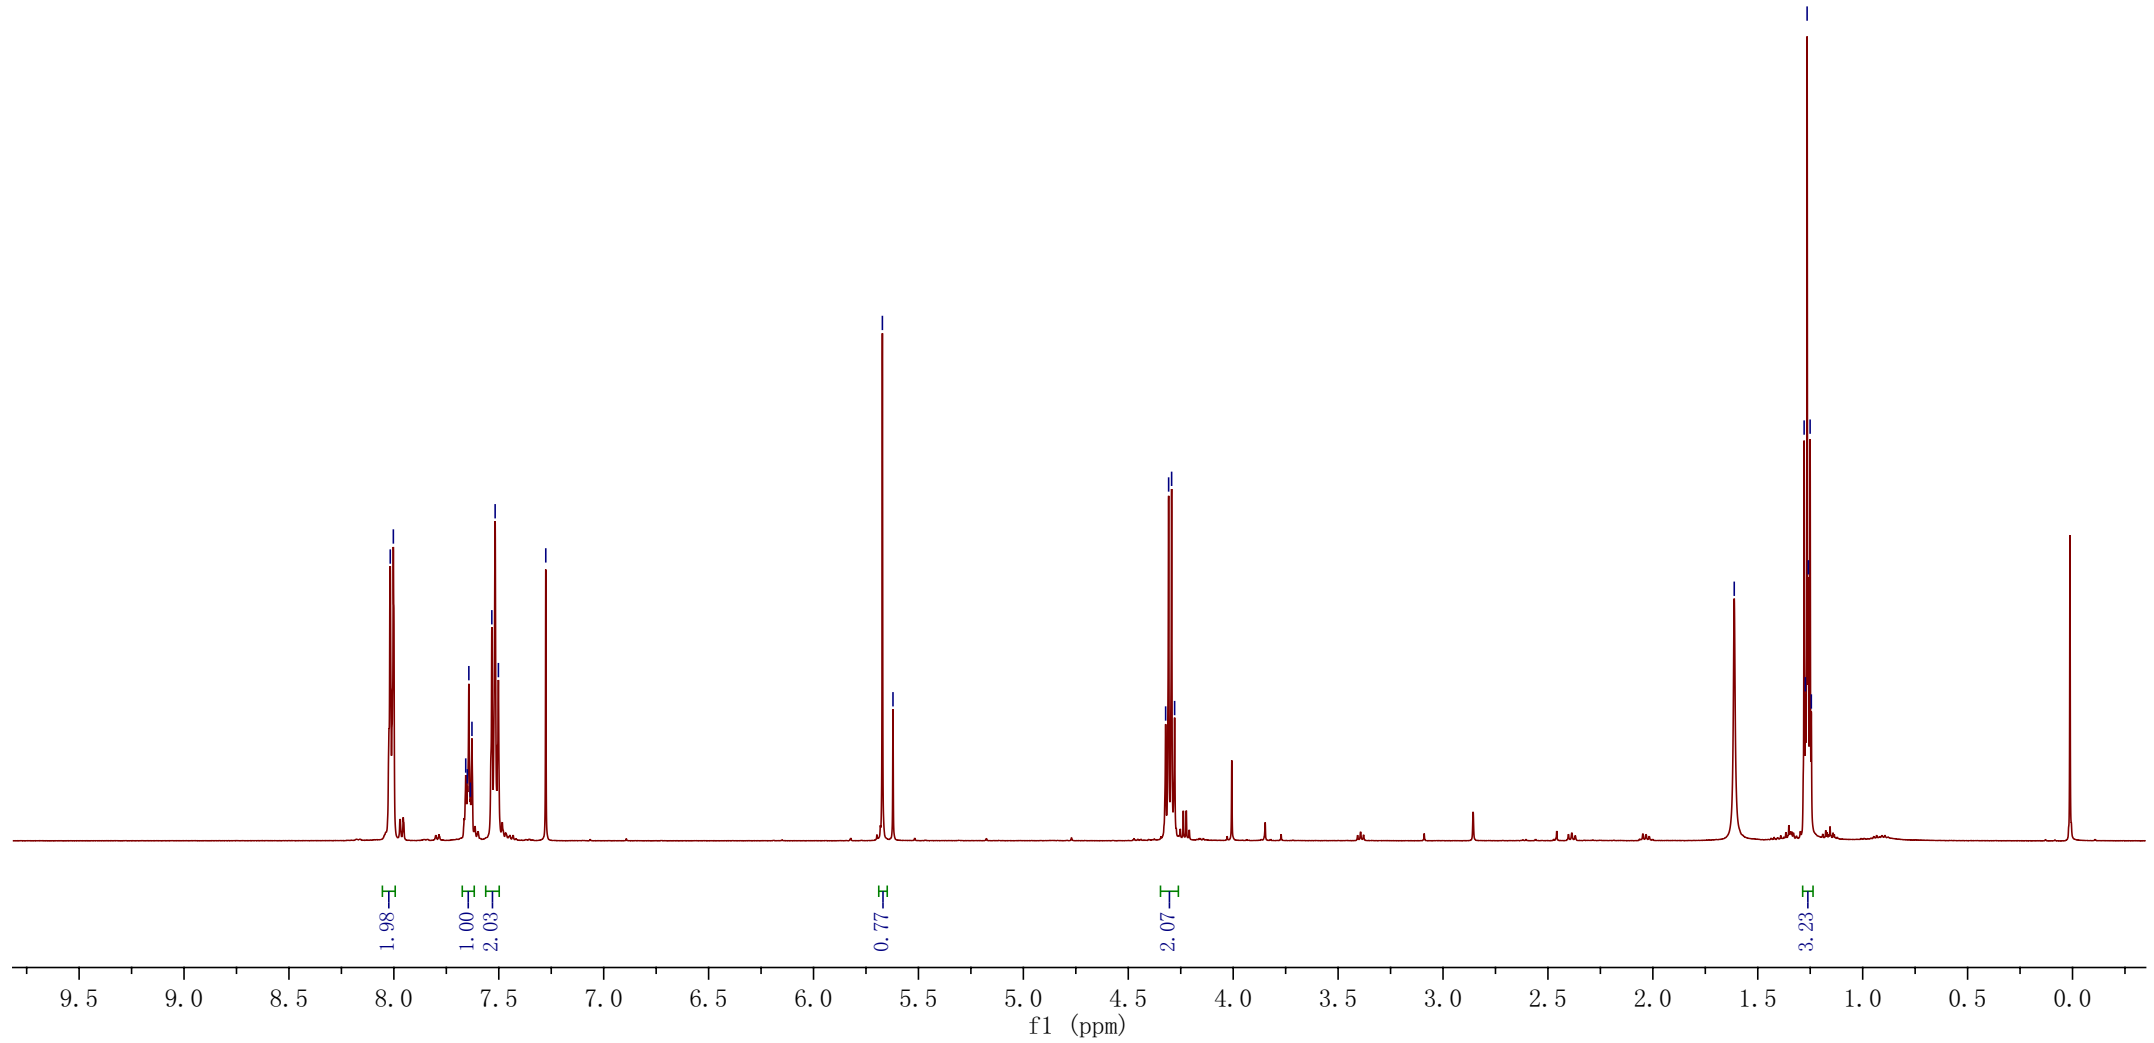

## checkCIF/PLATON report

Structure factors have been supplied for datablock(s) 171130\_sc171128

THIS REPORT IS FOR GUIDANCE ONLY. IF USED AS PART OF A REVIEW PROCEDURE FOR PUBLICATION, IT SHOULD NOT REPLACE THE EXPERTISE OF AN EXPERIENCED CRYSTALLOGRAPHIC REFEREE.

No syntax errors found.      CIF dictionary      Interpreting this report

### Datablock: 171130\_sc171128

---

Bond precision:    C-C = 0.0030 A

Wavelength=0.71073

Cell:              a=7.1753(5)              b=10.1901(9)              c=11.0558(9)  
                    alpha=109.818(7)          beta=97.305(6)          gamma=100.110(6)  
Temperature:      150 K

|                | Calculated    | Reported      |
|----------------|---------------|---------------|
| Volume         | 733.32(11)    | 733.32(11)    |
| Space group    | P -1          | P -1          |
| Hall group     | -P 1          | -P 1          |
| Moiety formula | C16 H17 N5 O2 | C16 H17 N5 O2 |
| Sum formula    | C16 H17 N5 O2 | C16 H17 N5 O2 |
| Mr             | 311.35        | 311.34        |
| Dx,g cm-3      | 1.410         | 1.410         |
| Z              | 2             | 2             |
| Mu (mm-1)      | 0.098         | 0.098         |
| F000           | 328.0         | 328.0         |
| F000'          | 328.13        |               |
| h,k,lmax       | 8,12,13       | 8,12,13       |
| Nref           | 2696          | 2690          |
| Tmin,Tmax      | 0.953,0.965   | 0.858,1.000   |
| Tmin'          | 0.953         |               |

Correction method= # Reported T Limits: Tmin=0.858 Tmax=1.000  
AbsCorr = MULTI-SCAN

Data completeness= 0.998

Theta(max)= 25.347

R(reflections)= 0.0482( 2027)

wR2(reflections)= 0.1312( 2690)

S = 1.028

Npar= 211

---

The following ALERTS were generated. Each ALERT has the format

**test-name\_ALERT\_alert-type\_alert-level.**

Click on the hyperlinks for more details of the test.

---

### ● Alert level C

|                   |                                                  |       |          |
|-------------------|--------------------------------------------------|-------|----------|
| PLAT911_ALERT_3_C | Missing FCF Refl Between Thmin & STh/L=          | 0.600 | 3 Report |
| PLAT978_ALERT_2_C | Number C-C Bonds with Positive Residual Density. |       | 0 Info   |

---

### ● Alert level G

|                   |                                                  |  |           |
|-------------------|--------------------------------------------------|--|-----------|
| PLAT380_ALERT_4_G | Incorrectly? Oriented X(sp2)-Methyl Moiety ..... |  | C12 Check |
| PLAT910_ALERT_3_G | Missing # of FCF Reflection(s) Below Theta(Min). |  | 3 Note    |

---

0 **ALERT level A** = Most likely a serious problem - resolve or explain  
0 **ALERT level B** = A potentially serious problem, consider carefully  
2 **ALERT level C** = Check. Ensure it is not caused by an omission or oversight  
2 **ALERT level G** = General information/check it is not something unexpected

0 ALERT type 1 CIF construction/syntax error, inconsistent or missing data  
1 ALERT type 2 Indicator that the structure model may be wrong or deficient  
2 ALERT type 3 Indicator that the structure quality may be low  
1 ALERT type 4 Improvement, methodology, query or suggestion  
0 ALERT type 5 Informative message, check

---

It is advisable to attempt to resolve as many as possible of the alerts in all categories. Often the minor alerts point to easily fixed oversights, errors and omissions in your CIF or refinement strategy, so attention to these fine details can be worthwhile. In order to resolve some of the more serious problems it may be necessary to carry out additional measurements or structure refinements. However, the purpose of your study may justify the reported deviations and the more serious of these should normally be commented upon in the discussion or experimental section of a paper or in the "special\_details" fields of the CIF. checkCIF was carefully designed to identify outliers and unusual parameters, but every test has its limitations and alerts that are not important in a particular case may appear. Conversely, the absence of alerts does not guarantee there are no aspects of the results needing attention. It is up to the individual to critically assess their own results and, if necessary, seek expert advice.

### Publication of your CIF in IUCr journals

A basic structural check has been run on your CIF. These basic checks will be run on all CIFs submitted for publication in IUCr journals (*Acta Crystallographica*, *Journal of Applied Crystallography*, *Journal of Synchrotron Radiation*); however, if you intend to submit to *Acta Crystallographica Section C* or *E* or *IUCrData*, you should make sure that full publication checks are run on the final version of your CIF prior to submission.

### Publication of your CIF in other journals

Please refer to the *Notes for Authors* of the relevant journal for any special instructions relating to CIF submission.

---

**PLATON version of 09/11/2017; check.def file version of 08/11/2017**

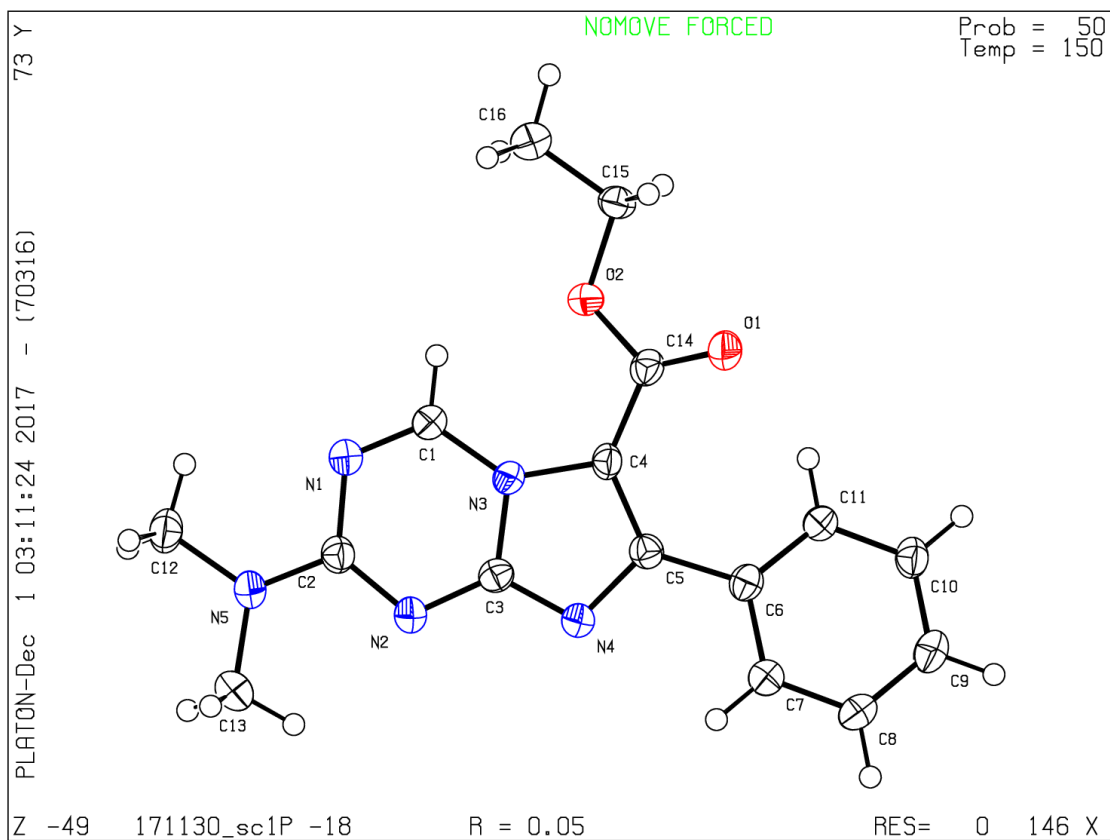

Supplement: c9nj05794c1.pdf [file c9nj05794c1.pdf]
